# Supplementary material for: Integrated proteomics and metabolomics analysis of rice leaves in response to rice straw return
Source: Front Plant Sci. 2022 Sep 13;13:997557. doi: 10.3389/fpls.2022.997557 (PMC9514043; doi:10.3389/fpls.2022.997557)
Supplement: Supplementary file 2 [file Table_1.XLSX]

## Sheet: Sheet1
	Supplementary Table 1 The soil basic fertility
	Organic matter (g kg-1)	NH4+-N (mg kg-1)	NO3--N (mg kg-1)	Available phosphorus (mg kg-1)	Available potassium (mg kg-1)	Total nitrogen (g kg-1)	Total phosphorus (g kg-1)	Total potassium (g kg-1)
	32.28	23.56	33.75	25.3	165	1.49	0.62	22
