# Supplementary material for: Integrated proteomics and metabolomics analysis of rice leaves in response to rice straw return
Source: Front Plant Sci. 2022 Sep 13;13:997557. doi: 10.3389/fpls.2022.997557 (PMC9514043; doi:10.3389/fpls.2022.997557)
Supplement: Supplementary file 3 [file Table_2.XLSX]

## Sheet: Sheet 1
Supplementary Table 2 The differentially expressed proteins between rice straw return and no straw return
Gene	Accession	Description	Score	Coverage	#.Proteins	#.Unique.Peptides	#.Peptides	#.PSMs	Mean SR	Mean S0	P-value	Q-value	Fold change (SR/S0)	Log2(fold change)
SNAT2	Q6Z1Y6	Serotonin N-acetyltransferase 2, chloroplastic OS=Oryza sativa subsp. japonica OX=39947 GN=SNAT2 PE=1 SV=1 - [SNAT2_ORYSJ]	45.15	18	1	3	3	3	0.000203175	0.000168603	0.0264581	0.0428483	1.20505	0.269089
OsI_27756	B8BAM2	Uncharacterized protein OS=Oryza sativa subsp. indica OX=39946 GN=OsI_27756 PE=4 SV=1 - [B8BAM2_ORYSI]	86.8159	30.57	2	5	5	8	0.000164125	0.000136166	0.00352246	0.0181582	1.20533	0.269428
OSJNBb0079L11.14	Q6L4K3	Uncharacterized protein OSJNBb0079L11.14 OS=Oryza sativa subsp. japonica OX=39947 GN=OSJNBb0079L11.14 PE=4 SV=1 - [Q6L4K3_ORYSJ]	28.62	1.52	3	1	1	2	0.000169194	0.000140125	0.00939936	0.0277412	1.20745	0.271959
OsI_19769	B8AXR7	Uncharacterized protein OS=Oryza sativa subsp. indica OX=39946 GN=OsI_19769 PE=4 SV=1 - [B8AXR7_ORYSI]	64.49	9.92	3	2	3	5	0.000203094	0.000168135	0.0121013	0.0308489	1.20792	0.272529
OsI_11724	B8AQ74	Uncharacterized protein OS=Oryza sativa subsp. indica OX=39946 GN=OsI_11724 PE=4 SV=1 - [B8AQ74_ORYSI]	0	9.46	2	1	2	2	0.000182106	0.000150535	0.00389159	0.0190417	1.20972	0.274678
OsI_37085	B8BIL3	Uncharacterized protein OS=Oryza sativa subsp. indica OX=39946 GN=OsI_37085 PE=3 SV=1 - [B8BIL3_ORYSI]	67.513	10.59	5	5	5	7	0.000211089	0.000174409	0.00953028	0.0279115	1.21031	0.275378
OsI_35259	B8BJB0	Uncharacterized protein OS=Oryza sativa subsp. indica OX=39946 GN=OsI_35259 PE=4 SV=1 - [B8BJB0_ORYSI]	61.1332	7.41	5	2	2	2	0.000179246	0.000148049	0.00248948	0.0156035	1.21072	0.27587
RPS21	P35687	40S ribosomal protein S21 OS=Oryza sativa subsp. japonica OX=39947 GN=RPS21 PE=3 SV=1 - [RS21_ORYSJ]	423.746	70.73	6	4	4	17	0.000186818	0.000154281	0.0110013	0.0296591	1.2109	0.276076
Os01g0868900	Q8S1N3	Os01g0868900 protein OS=Oryza sativa subsp. japonica OX=39947 GN=Os01g0868900 PE=4 SV=1 - [Q8S1N3_ORYSJ]	333.658	15.92	6	11	12	34	0.000227441	0.000187725	0.00109023	0.0109982	1.21157	0.276874
BADH2	B3VMC0	Betaine aldehyde dehydrogenase 2 OS=Oryza sativa subsp. indica OX=39946 GN=BADH2 PE=2 SV=1 - [BADH2_ORYSI]	520.907	38.17	23	3	17	37	0.000271983	0.000224424	0.0109461	0.0295985	1.21191	0.277286
OSIGBa0152L12.11	Q01JS3	OSIGBa0152L12.11 protein OS=Oryza sativa OX=4530 GN=OSIGBa0152L12.11 PE=4 SV=1 - [Q01JS3_ORYSA]	61.486	14.87	5	5	5	6	0.000243142	0.000200585	0.042326	0.0551943	1.21217	0.277588
OsI_05122	A2WYW0	Photosystem II reaction center Psb28 protein OS=Oryza sativa subsp. indica OX=39946 GN=OsI_05122 PE=3 SV=1 - [A2WYW0_ORYSI]	464.012	23.33	2	5	5	31	0.000226781	0.000186972	0.0154514	0.0338167	1.21292	0.27848
ADF4	Q84TB3	Actin-depolymerizing factor 4 OS=Oryza sativa subsp. japonica OX=39947 GN=ADF4 PE=1 SV=1 - [ADF4_ORYSJ]	90.6277	48.92	2	6	6	12	0.000232074	0.000191269	0.00777432	0.0255908	1.21334	0.278982
Os01g0866600	A0A0P0VAX3	Os01g0866600 protein (Fragment) OS=Oryza sativa subsp. japonica OX=39947 GN=Os01g0866600 PE=3 SV=1 - [A0A0P0VAX3_ORYSJ]	36.13	23.29	2	1	1	1	0.00023588	0.000194374	0.0107386	0.0293676	1.21353	0.279214
OsI_04995	B8A8G2	Uncharacterized protein OS=Oryza sativa subsp. indica OX=39946 GN=OsI_04995 PE=4 SV=1 - [B8A8G2_ORYSI]	134.166	19.06	4	8	8	11	0.000211572	0.000174286	0.0158489	0.034114	1.21393	0.279685
OsI_12514	B8AM45	Uncharacterized protein OS=Oryza sativa subsp. indica OX=39946 GN=OsI_12514 PE=4 SV=1 - [B8AM45_ORYSI]	0	5.32	3	1	1	1	0.00024562	0.000202201	0.048375	0.0593222	1.21473	0.280633
LOC_Os03g15920	Q10NL5	Expressed protein OS=Oryza sativa subsp. japonica OX=39947 GN=LOC_Os03g15920 PE=4 SV=1 - [Q10NL5_ORYSJ]	65.9458	62.04	5	6	6	10	0.000202488	0.000166685	0.0133916	0.0321008	1.21479	0.280711
OsI_09350	B8AEF3	Uncharacterized protein OS=Oryza sativa subsp. indica OX=39946 GN=OsI_09350 PE=4 SV=1 - [B8AEF3_ORYSI]	21.72	3.12	4	1	1	1	0.000220713	0.000181656	0.000629731	0.00916539	1.215	0.280957
ndhE	P0C332	NAD(P)H-quinone oxidoreductase subunit 4L, chloroplastic OS=Oryza sativa OX=4530 GN=ndhE PE=3 SV=1 - [NU4LC_ORYSA]	36.52	8.91	1	1	1	2	0.000228079	0.000187698	0.029213	0.0450448	1.21514	0.281123
OBGC1	Q0D3S3	Probable GTP-binding protein OBGC1, chloroplastic OS=Oryza sativa subsp. japonica OX=39947 GN=OBGC1 PE=3 SV=1 - [OBGC1_ORYSJ]	70.8959	7.58	4	5	5	6	0.000189348	0.000155821	0.00748038	0.0251679	1.21516	0.281152
OsI_24955	A2YIB7	Uncharacterized protein OS=Oryza sativa subsp. indica OX=39946 GN=OsI_24955 PE=4 SV=1 - [A2YIB7_ORYSI]	377.843	31.32	3	9	9	24	0.000185059	0.000152187	0.000668343	0.00935085	1.216	0.282143
OsI_34892	A2ZAV1	Uncharacterized protein OS=Oryza sativa subsp. indica OX=39946 GN=OsI_34892 PE=4 SV=1 - [A2ZAV1_ORYSI]	51.3337	14.42	3	4	4	6	0.000211282	0.000173746	0.000302849	0.00683167	1.21604	0.282191
OsI_03466	B8A8C8	Uncharacterized protein OS=Oryza sativa subsp. indica OX=39946 GN=OsI_03466 PE=4 SV=1 - [B8A8C8_ORYSI]	157.618	24.94	1	1	8	17	0.000208081	0.000171051	0.0267379	0.0430421	1.21648	0.282717
OsI_08180	A2X7J4	Uncharacterized protein OS=Oryza sativa subsp. indica OX=39946 GN=OsI_08180 PE=4 SV=1 - [A2X7J4_ORYSI]	38.97	3.08	1	1	1	1	0.000230924	0.000189752	0.0320069	0.0471602	1.21698	0.283305
OsJ_08701	B9F3Z9	Uncharacterized protein OS=Oryza sativa subsp. japonica OX=39947 GN=OsJ_08701 PE=4 SV=1 - [B9F3Z9_ORYSJ]	242.722	36.07	4	12	12	26	0.000209644	0.000172263	0.00435299	0.0200274	1.217	0.283328
B1011H02.4	Q25AG9	B1011H02.4 protein OS=Oryza sativa OX=4530 GN=B1011H02.4 PE=4 SV=1 - [Q25AG9_ORYSA]	0	2.17	3	2	2	2	0.000216548	0.000177931	0.00165864	0.0133459	1.21703	0.283366
PFP-ALPHA	B8B9Z2	Pyrophosphate--fructose 6-phosphate 1-phosphotransferase subunit alpha OS=Oryza sativa subsp. indica OX=39946 GN=PFP-ALPHA PE=3 SV=1 - [B8B9Z2_ORYSI]	39.35	5.02	2	2	2	2	0.000230099	0.000189062	0.000608826	0.0090586	1.21706	0.283396
prx110	Q5U1I3	Peroxidase OS=Oryza sativa subsp. japonica OX=39947 GN=prx110 PE=3 SV=1 - [Q5U1I3_ORYSJ]	84.4789	23.96	5	4	4	5	0.00020934	0.000171931	0.00123983	0.011679	1.21758	0.284017
OsI_03904	A2WVI5	Uncharacterized protein OS=Oryza sativa subsp. indica OX=39946 GN=OsI_03904 PE=4 SV=1 - [A2WVI5_ORYSI]	52.5	4.94	1	1	1	1	0.000219143	0.000179954	0.0255266	0.0421859	1.21777	0.284242
Os06g0506600	A0A0P0WX41	Os06g0506600 protein OS=Oryza sativa subsp. japonica OX=39947 GN=Os06g0506600 PE=3 SV=1 - [A0A0P0WX41_ORYSJ]	30.77	42.03	3	1	2	3	0.000189938	0.000155923	0.000574581	0.00887301	1.21815	0.284691
OsI_15810	A2XT72	Ferredoxin OS=Oryza sativa subsp. indica OX=39946 GN=OsI_15810 PE=3 SV=1 - [A2XT72_ORYSI]	318.369	62.5	4	6	6	24	0.000242481	0.000199046	0.0116759	0.0304005	1.21822	0.284776
Os03g0707200	Q0DP94	Os03g0707200 protein OS=Oryza sativa subsp. japonica OX=39947 GN=Os03g0707200 PE=4 SV=1 - [Q0DP94_ORYSJ]	57.59	4.26	5	1	1	1	0.000301207	0.000247198	0.0190065	0.036723	1.21848	0.285088
OsI_16479	A2XV42	Uncharacterized protein OS=Oryza sativa subsp. indica OX=39946 GN=OsI_16479 PE=4 SV=1 - [A2XV42_ORYSI]	34.26	1.89	2	1	1	1	0.000211496	0.000173289	0.00714831	0.0246746	1.22048	0.287445
OJ1540_G08.27	Q6ZAX7	Uncharacterized protein OJ1540_G08.27 OS=Oryza sativa subsp. japonica OX=39947 GN=OJ1540_G08.27 PE=4 SV=1 - [Q6ZAX7_ORYSJ]	39.86	17.69	2	1	1	1	0.000336477	0.000275672	0.0129272	0.0316678	1.22057	0.287555
Os07g0573300	Q0D593	Os07g0573300 protein OS=Oryza sativa subsp. japonica OX=39947 GN=Os07g0573300 PE=4 SV=1 - [Q0D593_ORYSJ]	40.79	4.98	5	1	1	1	0.000220107	0.000180291	0.0172506	0.0352092	1.22084	0.287873
OsI_15719	A2XSY5	Uncharacterized protein OS=Oryza sativa subsp. indica OX=39946 GN=OsI_15719 PE=4 SV=1 - [A2XSY5_ORYSI]	95.8844	25.23	4	5	7	7	0.000225127	0.000184308	0.0375133	0.0515913	1.22147	0.288622
OsI_05080	B8A8T3	Uncharacterized protein OS=Oryza sativa subsp. indica OX=39946 GN=OsI_05080 PE=3 SV=1 - [B8A8T3_ORYSI]	31.16	2.98	1	1	1	1	0.000269158	0.000220352	0.0198698	0.0375003	1.22149	0.288643
OJ1004_A11.16-2	Q6Z315	DCL protein-like OS=Oryza sativa subsp. japonica OX=39947 GN=OJ1004_A11.16-2 PE=4 SV=1 - [Q6Z315_ORYSJ]	26.78	15.89	2	2	2	3	0.000192499	0.00015744	0.00277193	0.0163626	1.22268	0.290047
Os08g0410300	C7J5L8	Os08g0410300 protein (Fragment) OS=Oryza sativa subsp. japonica OX=39947 GN=Os08g0410300 PE=4 SV=1 - [C7J5L8_ORYSJ]	42.27	2.57	5	1	1	1	0.000260425	0.000212861	0.0208835	0.0384335	1.22345	0.290955
OsI_34807	B8BIN0	Ferritin OS=Oryza sativa subsp. indica OX=39946 GN=OsI_34807 PE=3 SV=1 - [B8BIN0_ORYSI]	309.587	45.02	12	12	12	37	0.000186361	0.000152147	0.00297278	0.0168703	1.22487	0.292626
Os11g0425600	Q0IT26	Os11g0425600 protein OS=Oryza sativa subsp. japonica OX=39947 GN=Os11g0425600 PE=4 SV=1 - [Q0IT26_ORYSJ]	56.4084	35.71	2	2	2	4	0.000225244	0.000183886	0.0344158	0.049073	1.22491	0.292679
Os01g0512100	Q5QMV0	Os01g0512100 protein OS=Oryza sativa subsp. japonica OX=39947 GN=Os01g0512100 PE=2 SV=1 - [Q5QMV0_ORYSJ]	30	7.69	3	4	4	4	0.000225818	0.000184286	0.000221891	0.00657071	1.22537	0.293214
Os01g0595100	B7FAK7	Os01g0595100 protein OS=Oryza sativa subsp. japonica OX=39947 GN=Os01g0595100 PE=2 SV=1 - [B7FAK7_ORYSJ]	54.032	6.67	4	4	4	4	0.00023522	0.000191889	0.00469565	0.0206864	1.22581	0.293741
OsJ_10617	B9F844	Uncharacterized protein OS=Oryza sativa subsp. japonica OX=39947 GN=OsJ_10617 PE=4 SV=1 - [B9F844_ORYSJ]	83.4967	18.3	3	3	3	6	0.000189007	0.000154188	0.0167881	0.0348397	1.22582	0.293745
P0028E10.16	Q9AS76	Kinase interacting protein 1-like OS=Oryza sativa subsp. japonica OX=39947 GN=P0028E10.16 PE=4 SV=1 - [Q9AS76_ORYSJ]	34.57	20.57	7	10	10	10	0.000242087	0.000197469	0.0270557	0.0432728	1.22595	0.293896
OsI_19730	B8AXP3	Uncharacterized protein OS=Oryza sativa subsp. indica OX=39946 GN=OsI_19730 PE=4 SV=1 - [B8AXP3_ORYSI]	21.15	3.89	1	1	1	2	0.00021622	0.000176288	0.000220836	0.00656622	1.22651	0.294559
OsJ_15493	A3AVM8	Uncharacterized protein OS=Oryza sativa subsp. japonica OX=39947 GN=OsJ_15493 PE=4 SV=1 - [A3AVM8_ORYSJ]	32.21	2.72	2	1	1	1	0.000304568	0.000248279	0.0485795	0.0594532	1.22672	0.294802
Os01g0924400	Q5JJP7	Os01g0924400 protein OS=Oryza sativa subsp. japonica OX=39947 GN=Os01g0924400 PE=2 SV=1 - [Q5JJP7_ORYSJ]	22.49	2.84	2	1	1	1	0.000217726	0.000177476	0.0334838	0.0482786	1.22679	0.29489
B1046G12.28	Q8S2Q8	Os01g0198900 protein OS=Oryza sativa subsp. japonica OX=39947 GN=B1046G12.28 PE=2 SV=1 - [Q8S2Q8_ORYSJ]	30.1902	19.44	2	3	3	6	0.000211672	0.000172512	0.0147474	0.0332649	1.227	0.295138
OsI_00953	B8AAN6	Uncharacterized protein OS=Oryza sativa subsp. indica OX=39946 GN=OsI_00953 PE=4 SV=1 - [B8AAN6_ORYSI]	37.4147	9.5	2	3	3	3	0.000233565	0.000190257	0.0480241	0.0590962	1.22763	0.295878
LOC_Os03g22420	Q10LK8	AAA-type ATPase family protein, putative, expressed OS=Oryza sativa subsp. japonica OX=39947 GN=LOC_Os03g22420 PE=4 SV=1 - [Q10LK8_ORYSJ]	36.64	4.9	10	2	4	4	0.00021771	0.000177324	0.0107747	0.0294082	1.22775	0.296021
Os10g0109300	A0A0P0XR31	Peroxidase (Fragment) OS=Oryza sativa subsp. japonica OX=39947 GN=Os10g0109300 PE=3 SV=1 - [A0A0P0XR31_ORYSJ]	105.976	12.87	4	4	4	7	0.000238221	0.000194018	0.00063999	0.00921611	1.22783	0.296113
OsI_16660	A2XVK3	Phenylalanine ammonia-lyase OS=Oryza sativa subsp. indica OX=39946 GN=OsI_16660 PE=3 SV=1 - [A2XVK3_ORYSI]	126.177	20.73	5	7	14	21	0.000283694	0.000231013	0.00877597	0.0269038	1.22804	0.296362
Os01g0970400	P48599	Eukaryotic translation initiation factor 4E-1 OS=Oryza sativa subsp. japonica OX=39947 GN=Os01g0970400 PE=2 SV=1 - [IF4E1_ORYSJ]	38.43	11.01	1	2	2	3	0.000222347	0.000180884	0.0184491	0.0362011	1.22922	0.297746
OsJ_20183	A3B8J3	Uncharacterized protein OS=Oryza sativa subsp. japonica OX=39947 GN=OsJ_20183 PE=4 SV=1 - [A3B8J3_ORYSJ]	31.4	10	4	3	3	3	0.000264508	0.000215172	0.0161736	0.0343497	1.22929	0.297824
OSIGBa0142I02-OSIGBa0101B20.3	Q01HI6	OSIGBa0142I02-OSIGBa0101B20.3 protein OS=Oryza sativa OX=4530 GN=OSIGBa0142I02-OSIGBa0101B20.3 PE=4 SV=1 - [Q01HI6_ORYSA]	921.476	57.73	4	4	18	62	0.000213606	0.000173683	0.0290036	0.0448783	1.22986	0.298495
OsJ_07545	B9F142	Uncharacterized protein OS=Oryza sativa subsp. japonica OX=39947 GN=OsJ_07545 PE=4 SV=1 - [B9F142_ORYSJ]	44.07	7.48	3	1	1	2	0.000185517	0.000150813	0.00429147	0.0199028	1.23011	0.29879
Os11g0643700	A0A0P0Y588	Os11g0643700 protein (Fragment) OS=Oryza sativa subsp. japonica OX=39947 GN=Os11g0643700 PE=4 SV=1 - [A0A0P0Y588_ORYSJ]	47.78	4.77	4	2	2	2	0.000210296	0.000170927	0.0244707	0.0414014	1.23033	0.299041
OSJNBb0111K12.9	Q75IT2	'putative pentatricopeptide (PPR) repeat-containing protein, PF01535' OS=Oryza sativa subsp. japonica OX=39947 GN=OSJNBb0111K12.9 PE=4 SV=1 - [Q75IT2_ORYSJ]	47.16	2.52	1	2	2	2	0.000202625	0.000164604	0.00624986	0.0232661	1.23098	0.299812
OsI_06446	A2X2N4	Uncharacterized protein OS=Oryza sativa subsp. indica OX=39946 GN=OsI_06446 PE=4 SV=1 - [A2X2N4_ORYSI]	62.6178	3.24	69	3	4	6	0.000240853	0.000195485	0.01615	0.0343328	1.23208	0.301091
OsI_32245	A2Z3N5	Uncharacterized protein OS=Oryza sativa subsp. indica OX=39946 GN=OsI_32245 PE=4 SV=1 - [A2Z3N5_ORYSI]	201.4	10.06	4	22	22	23	0.000250487	0.000203128	0.00574556	0.0224253	1.23315	0.302346
Pigm_GM4.1	A1XFD3	Nitrate-induced NOI protein-like protein Pigm-NIP OS=Oryza sativa subsp. indica OX=39946 GN=Pigm_GM4.1 PE=4 SV=1 - [A1XFD3_ORYSI]	36.61	50	4	3	3	4	0.000248401	0.000201278	0.0032974	0.0176129	1.23412	0.303481
OsI_27609	B8BAG3	Uncharacterized protein OS=Oryza sativa subsp. indica OX=39946 GN=OsI_27609 PE=4 SV=1 - [B8BAG3_ORYSI]	111.193	41.46	3	6	6	8	0.00020967	0.000169774	0.00110672	0.0110709	1.235	0.304511
OsI_31743	B8BCQ3	Uncharacterized protein OS=Oryza sativa subsp. indica OX=39946 GN=OsI_31743 PE=3 SV=1 - [B8BCQ3_ORYSI]	778.416	41.56	1	2	27	84	0.000187552	0.000151858	0.0286428	0.0445886	1.23505	0.304568
P0666G10.103	Q6ZD31	Os08g0538600 protein OS=Oryza sativa subsp. japonica OX=39947 GN=P0666G10.103 PE=2 SV=1 - [Q6ZD31_ORYSJ]	128.738	27.12	2	8	8	13	0.000164522	0.000133141	0.00543881	0.0219397	1.2357	0.30533
OsI_23221	B8B3A5	Uncharacterized protein OS=Oryza sativa subsp. indica OX=39946 GN=OsI_23221 PE=3 SV=1 - [B8B3A5_ORYSI]	61.94	6.2	1	2	2	2	0.000205235	0.000166022	0.00364944	0.0184726	1.23619	0.305904
OsI_11787	A2XHA9	Uncharacterized protein OS=Oryza sativa subsp. indica OX=39946 GN=OsI_11787 PE=4 SV=1 - [A2XHA9_ORYSI]	67.9952	12.92	4	7	7	8	0.000215792	0.000174468	0.00541557	0.0219037	1.23686	0.306681
PL10A	Q75HJ0	DEAD-box ATP-dependent RNA helicase 37 OS=Oryza sativa subsp. japonica OX=39947 GN=PL10A PE=2 SV=1 - [RH37_ORYSJ]	239.38	33.12	6	6	17	30	0.000223253	0.00018048	0.00265274	0.0160446	1.237	0.306841
LOC_Os11g28980	Q2R4C3	Gpi16 subunit, GPI transamidase component family protein, expressed OS=Oryza sativa subsp. japonica OX=39947 GN=LOC_Os11g28980 PE=4 SV=1 - [Q2R4C3_ORYSJ]	0	1.91	3	1	1	1	0.000242964	0.000196187	0.0241365	0.0411453	1.23843	0.308514
OsI_10598	A2XE50	Uncharacterized protein OS=Oryza sativa subsp. indica OX=39946 GN=OsI_10598 PE=4 SV=1 - [A2XE50_ORYSI]	150.478	22.52	2	5	5	9	0.000184646	0.000149085	0.00151051	0.0128149	1.23853	0.308625
OsI_06131	B8AIY6	Uncharacterized protein OS=Oryza sativa subsp. indica OX=39946 GN=OsI_06131 PE=3 SV=1 - [B8AIY6_ORYSI]	25.67	3.01	5	1	3	5	0.000212383	0.000171436	0.0256823	0.0422985	1.23885	0.309001
OsI_18723	B8AYY6	Uncharacterized protein OS=Oryza sativa subsp. indica OX=39946 GN=OsI_18723 PE=4 SV=1 - [B8AYY6_ORYSI]	29.95	8.55	1	1	1	1	0.000231186	0.000186429	0.00428467	0.0198889	1.24008	0.310428
OsJ_29732	B9G449	Uncharacterized protein OS=Oryza sativa subsp. japonica OX=39947 GN=OsJ_29732 PE=3 SV=1 - [B9G449_ORYSJ]	770.04	48.67	1	3	28	86	0.000155985	0.000125624	0.0125485	0.0313004	1.24168	0.312296
OsI_04286	B8ABM6	Uncharacterized protein OS=Oryza sativa subsp. indica OX=39946 GN=OsI_04286 PE=4 SV=1 - [B8ABM6_ORYSI]	43.315	6.44	5	2	2	4	0.000213656	0.000171987	0.0276363	0.0437618	1.24228	0.312987
LOC_Os12g14070	Q2QV45	70 kDa heat shock protein OS=Oryza sativa subsp. japonica OX=39947 GN=LOC_Os12g14070 PE=2 SV=1 - [Q2QV45_ORYSJ]	2517.51	63.18	6	23	46	220	0.000183937	0.000148048	0.000466244	0.0081806	1.24242	0.313148
OSIGBa0153E02-OSIGBa0093I20.14	Q01HR1	OSIGBa0153E02-OSIGBa0093I20.14 protein OS=Oryza sativa OX=4530 GN=OSIGBa0153E02-OSIGBa0093I20.14 PE=4 SV=1 - [Q01HR1_ORYSA]	38.33	2.35	2	1	1	1	0.000249368	0.000200679	0.00244387	0.0154974	1.24262	0.313386
OsI_12486	A2XJ70	Uncharacterized protein OS=Oryza sativa subsp. indica OX=39946 GN=OsI_12486 PE=4 SV=1 - [A2XJ70_ORYSI]	0	8.33	4	1	1	1	0.000230417	0.000185409	0.00586045	0.0226071	1.24275	0.313536
OsJ_08883	B9F483	Uncharacterized protein OS=Oryza sativa subsp. japonica OX=39947 GN=OsJ_08883 PE=3 SV=1 - [B9F483_ORYSJ]	526.132	32.91	3	16	16	36	0.000160231	0.000128871	0.0364818	0.0507728	1.24334	0.314224
U2AF35B	Q6AUG0	Splicing factor U2af small subunit B OS=Oryza sativa subsp. japonica OX=39947 GN=U2AF35B PE=2 SV=1 - [U2AFB_ORYSJ]	70.0683	18.75	2	5	5	5	0.000203575	0.000163638	0.00826107	0.0262522	1.24406	0.315053
OSJNBb0008G24.26	Q8RUM9	Amidophosphoribosyltransferase OS=Oryza sativa subsp. japonica OX=39947 GN=OSJNBb0008G24.26 PE=3 SV=1 - [Q8RUM9_ORYSJ]	356.648	23.77	4	6	9	17	0.00021605	0.000173646	0.00639137	0.023496	1.2442	0.315215
OsI_00591	A2WL80	Uncharacterized protein OS=Oryza sativa subsp. indica OX=39946 GN=OsI_00591 PE=4 SV=1 - [A2WL80_ORYSI]	105.518	48.69	2	8	8	12	0.000247634	0.000198997	0.00231461	0.0151826	1.24441	0.315463
OsI_27635	A2YQR2	Fructose-bisphosphate aldolase OS=Oryza sativa subsp. indica OX=39946 GN=OsI_27635 PE=3 SV=1 - [A2YQR2_ORYSI]	562.638	21.27	1	3	7	44	0.00025348	0.000203659	0.00907191	0.0273036	1.24463	0.315711
Os02g0206700	Q67TS1	Glycosyltransferase OS=Oryza sativa subsp. japonica OX=39947 GN=Os02g0206700 PE=2 SV=1 - [Q67TS1_ORYSJ]	79.8962	11.78	5	1	4	6	0.000226851	0.00018222	0.0222409	0.0396159	1.24493	0.316062
OsJ_18728	B9FPV7	Uncharacterized protein OS=Oryza sativa subsp. japonica OX=39947 GN=OsJ_18728 PE=4 SV=1 - [B9FPV7_ORYSJ]	37.03	7.95	4	1	1	2	0.0002068	0.000166038	0.00956935	0.0279618	1.2455	0.316724
OsI_08635	A2X8S3	Uncharacterized protein OS=Oryza sativa subsp. indica OX=39946 GN=OsI_08635 PE=4 SV=1 - [A2X8S3_ORYSI]	30.19	12.99	1	2	2	2	0.000225749	0.000181128	0.0105357	0.0291367	1.24635	0.317709
Os03g0569900	Q10HZ8	Os03g0569900 protein OS=Oryza sativa subsp. japonica OX=39947 GN=Os03g0569900 PE=2 SV=1 - [Q10HZ8_ORYSJ]	64.6808	8.71	6	3	3	4	0.000186799	0.000149857	0.000291801	0.00680363	1.24651	0.317896
OsI_24670	B8B6S0	Peroxidase OS=Oryza sativa subsp. indica OX=39946 GN=OsI_24670 PE=3 SV=1 - [B8B6S0_ORYSI]	35.3383	15.76	2	4	4	4	0.00023862	0.000191298	0.00658493	0.0238014	1.24738	0.318898
OsI_32160	A2Z3F6	Uncharacterized protein OS=Oryza sativa subsp. indica OX=39946 GN=OsI_32160 PE=3 SV=1 - [A2Z3F6_ORYSI]	0	6.4	25	1	3	4	0.000186031	0.000149108	0.0177664	0.0356071	1.24762	0.31918
OsI_03766	A2WV53	Uncharacterized protein OS=Oryza sativa subsp. indica OX=39946 GN=OsI_03766 PE=4 SV=1 - [A2WV53_ORYSI]	49.21	11.06	4	2	2	2	0.000190733	0.000152698	0.0012595	0.0117699	1.24908	0.320868
OsI_24385	A2YGS4	Uncharacterized protein OS=Oryza sativa subsp. indica OX=39946 GN=OsI_24385 PE=4 SV=1 - [A2YGS4_ORYSI]	203.35	31.17	6	17	17	29	0.000204639	0.000163642	0.00295858	0.0168357	1.25053	0.322538
OsI_24063	B8B172	Uncharacterized protein OS=Oryza sativa subsp. indica OX=39946 GN=OsI_24063 PE=4 SV=1 - [B8B172_ORYSI]	38.21	5.32	1	2	2	2	0.000189641	0.000151633	0.00481314	0.0208997	1.25066	0.322686
OsI_34868	A2ZAT2	Non-specific lipid-transfer protein OS=Oryza sativa subsp. indica OX=39946 GN=OsI_34868 PE=3 SV=1 - [A2ZAT2_ORYSI]	555.249	47.46	3	4	5	37	0.000287301	0.000229102	0.02118	0.0386985	1.25403	0.326577
CAB1R	P12330	Chlorophyll a-b binding protein 1, chloroplastic OS=Oryza sativa subsp. japonica OX=39947 GN=CAB1R PE=2 SV=2 - [CB21_ORYSJ]	3315.23	59.62	3	4	10	304	0.000236911	0.000188681	0.0131801	0.031906	1.25562	0.328396
Os03g0206700	Q0DU53	Os03g0206700 protein OS=Oryza sativa subsp. japonica OX=39947 GN=Os03g0206700 PE=3 SV=1 - [Q0DU53_ORYSJ]	40.3452	5.63	3	2	2	2	0.000190939	0.000152065	0.00555961	0.0221284	1.25564	0.328426
OSJNBa0054K20.23	Q6K4P0	Uncharacterized protein OSJNBa0054K20.23 OS=Oryza sativa subsp. japonica OX=39947 GN=OSJNBa0054K20.23 PE=4 SV=1 - [Q6K4P0_ORYSJ]	0	3.9	2	1	1	1	0.000161224	0.000128392	0.0186865	0.0364254	1.25572	0.328517
OsJ_21245	B9FT46	Uncharacterized protein OS=Oryza sativa subsp. japonica OX=39947 GN=OsJ_21245 PE=4 SV=1 - [B9FT46_ORYSJ]	79.2236	25.74	2	3	3	3	0.000213035	0.000169613	0.00191997	0.0141602	1.25601	0.328849
KMK0024M20.25	Q5VM93	Os06g0157800 protein OS=Oryza sativa subsp. japonica OX=39947 GN=KMK0024M20.25 PE=2 SV=1 - [Q5VM93_ORYSJ]	85.3659	28.69	2	3	3	7	0.000234894	0.000186959	0.00469453	0.0206844	1.25639	0.329286
OsI_22808	A2YCH0	Uncharacterized protein OS=Oryza sativa subsp. indica OX=39946 GN=OsI_22808 PE=4 SV=1 - [A2YCH0_ORYSI]	746.902	54.96	1	5	5	43	0.000252238	0.000200654	0.0311649	0.0465427	1.25708	0.330075
OsJ_25702	A3BNR1	Uncharacterized protein OS=Oryza sativa subsp. japonica OX=39947 GN=OsJ_25702 PE=4 SV=1 - [A3BNR1_ORYSJ]	52.1196	7.16	3	3	3	6	0.000211741	0.000168334	0.0106628	0.029282	1.25787	0.33098
rpl36	P62727	50S ribosomal protein L36, chloroplastic OS=Oryza sativa subsp. japonica OX=39947 GN=rpl36 PE=3 SV=1 - [RK36_ORYSJ]	36.45	18.92	1	1	1	3	0.000214181	0.000170232	0.0384133	0.0522898	1.25817	0.331327
Os06g0651600	Q67UP9	Probable protein phosphatase 2C 58 OS=Oryza sativa subsp. japonica OX=39947 GN=Os06g0651600 PE=2 SV=1 - [P2C58_ORYSJ]	0	5.71	1	2	2	2	0.000277935	0.000220639	0.0194798	0.0371536	1.25968	0.333055
Os11g0634500	Q7XZX4	40S ribosomal protein S29, putative, expressed OS=Oryza sativa subsp. japonica OX=39947 GN=Os11g0634500 PE=4 SV=1 - [Q7XZX4_ORYSJ]	23.13	17.86	7	1	1	3	0.000222907	0.000176748	0.00855868	0.0266346	1.26116	0.334753
Os01g0851400	Q8LQ36	Putative ataxin-3 homolog OS=Oryza sativa subsp. japonica OX=39947 GN=Os01g0851400 PE=3 SV=1 - [ATX3_ORYSJ]	45.44	5.95	3	2	2	2	0.000258913	0.000205245	0.0309524	0.0463842	1.26148	0.335122
SSII-1_3	A0A076FSW6	Starch synthase, chloroplastic/amyloplastic OS=Oryza sativa subsp. indica OX=39946 GN=SSII-1_3 PE=3 SV=1 - [A0A076FSW6_ORYSI]	61.7884	10.95	8	5	6	10	0.000156032	0.000123648	0.0219631	0.0393802	1.26191	0.335606
eIF-5A	Q9ZSU2	Eukaryotic translation initiation factor 5A OS=Oryza sativa OX=4530 GN=eIF-5A PE=2 SV=1 - [Q9ZSU2_ORYSA]	99.699	41.88	3	3	8	18	0.000168818	0.000133689	0.00213518	0.0147354	1.26277	0.336594
Os04g0480100	B7FAA5	Os04g0480100 protein OS=Oryza sativa subsp. japonica OX=39947 GN=Os04g0480100 PE=2 SV=1 - [B7FAA5_ORYSJ]	35.3476	13.35	6	8	8	9	0.000215355	0.000170426	0.000294282	0.00681009	1.26363	0.337571
OsI_17950	B8ARI2	Uncharacterized protein OS=Oryza sativa subsp. indica OX=39946 GN=OsI_17950 PE=4 SV=1 - [B8ARI2_ORYSI]	45.44	5.35	4	3	5	5	0.000233962	0.000185126	0.048141	0.0591717	1.2638	0.337763
OsJ_08790	A3ACG9	Uncharacterized protein OS=Oryza sativa subsp. japonica OX=39947 GN=OsJ_08790 PE=4 SV=1 - [A3ACG9_ORYSJ]	20.68	2.96	2	2	2	2	0.000255895	0.000202387	0.0145349	0.0330916	1.26439	0.338438
OsI_27012	A2YP23	Uncharacterized protein OS=Oryza sativa subsp. indica OX=39946 GN=OsI_27012 PE=4 SV=1 - [A2YP23_ORYSI]	179.007	26.5	7	8	13	18	0.000211472	0.00016723	0.0449853	0.0570717	1.26456	0.338631
OsI_21059	A2Y7P0	Uncharacterized protein OS=Oryza sativa subsp. indica OX=39946 GN=OsI_21059 PE=4 SV=1 - [A2Y7P0_ORYSI]	43.55	6.09	2	4	4	4	0.000198477	0.000156906	0.00366246	0.0185042	1.26494	0.339074
LOC_Os03g58710	Q10BY1	Riboflavin biosynthesis protein, putative, expressed OS=Oryza sativa subsp. japonica OX=39947 GN=LOC_Os03g58710 PE=4 SV=1 - [Q10BY1_ORYSJ]	26.71	2.84	3	1	1	1	0.000213556	0.00016878	0.0114898	0.0301984	1.2653	0.339476
LOC_Os11g19810	H2KWG3	PWWP domain containing protein, expressed OS=Oryza sativa subsp. japonica OX=39947 GN=LOC_Os11g19810 PE=4 SV=1 - [H2KWG3_ORYSJ]	183.128	16.35	5	14	14	18	0.000222559	0.00017587	0.00548395	0.0220091	1.26547	0.339676
Os05g0463800	A0A0P0WNF0	Os05g0463800 protein OS=Oryza sativa subsp. japonica OX=39947 GN=Os05g0463800 PE=4 SV=1 - [A0A0P0WNF0_ORYSJ]	62.1724	19.38	3	2	2	2	0.000219098	0.000172932	0.00733864	0.0249588	1.26696	0.341368
CDSP32	Q84NN4	Thioredoxin-like protein CDSP32, chloroplastic OS=Oryza sativa subsp. japonica OX=39947 GN=CDSP32 PE=2 SV=1 - [CDSP_ORYSJ]	292.444	49.5	2	12	12	39	0.000195579	0.000154225	0.000667885	0.00934874	1.26814	0.342719
Os02g0719800	A0A0P0VNW4	Os02g0719800 protein OS=Oryza sativa subsp. japonica OX=39947 GN=Os02g0719800 PE=4 SV=1 - [A0A0P0VNW4_ORYSJ]	42.77	4.44	4	2	2	2	0.000183919	0.000144762	0.0124004	0.031153	1.27049	0.345389
OsJ_26103	B9FZ58	Uncharacterized protein OS=Oryza sativa subsp. japonica OX=39947 GN=OsJ_26103 PE=4 SV=1 - [B9FZ58_ORYSJ]	20.13	2.57	3	2	2	2	0.00025017	0.000196764	0.00910532	0.027349	1.27142	0.346445
OsI_23305	B8B3L5	Peroxidase OS=Oryza sativa subsp. indica OX=39946 GN=OsI_23305 PE=3 SV=1 - [B8B3L5_ORYSI]	72.8972	29.32	1	5	5	5	0.000186776	0.000146882	0.0229675	0.0402181	1.27161	0.346652
P0696G06.11	Q8S0K1	Os01g0894500 protein OS=Oryza sativa subsp. japonica OX=39947 GN=P0696G06.11 PE=2 SV=1 - [Q8S0K1_ORYSJ]	32.04	10.49	1	2	2	2	0.000254281	0.00019975	0.0279381	0.0440127	1.273	0.348228
OsI_12726	A2XJV7	Uncharacterized protein OS=Oryza sativa subsp. indica OX=39946 GN=OsI_12726 PE=4 SV=1 - [A2XJV7_ORYSI]	47.94	8.68	2	2	2	3	0.000218132	0.000171212	0.00667964	0.0239471	1.27404	0.349416
OsI_11257	A2XFV9	Uncharacterized protein OS=Oryza sativa subsp. indica OX=39946 GN=OsI_11257 PE=4 SV=1 - [A2XFV9_ORYSI]	78.4779	18.06	5	8	8	8	0.000203736	0.000159858	0.00732406	0.0249373	1.27448	0.349907
P0042B03.41	Q6ZAJ3	Uncharacterized protein P0042B03.41 OS=Oryza sativa subsp. japonica OX=39947 GN=P0042B03.41 PE=4 SV=1 - [Q6ZAJ3_ORYSJ]	24.68	6.19	4	2	2	3	0.000170982	0.00013403	0.040322	0.053725	1.2757	0.351285
P0482C06.33	Q658A2	Transcriptional co-repressor-like OS=Oryza sativa subsp. japonica OX=39947 GN=P0482C06.33 PE=4 SV=1 - [Q658A2_ORYSJ]	51.7884	5.23	8	5	6	7	0.00020313	0.000159197	0.00154686	0.0129505	1.27597	0.351591
Os06g0731300	Q0D996	Os06g0731300 protein (Fragment) OS=Oryza sativa subsp. japonica OX=39947 GN=Os06g0731300 PE=4 SV=1 - [Q0D996_ORYSJ]	58.057	32.84	3	3	3	5	0.000255967	0.000200386	0.0325741	0.0475669	1.27737	0.353172
OsJ_19806	A3B7I6	RING-type E3 ubiquitin transferase OS=Oryza sativa subsp. japonica OX=39947 GN=OsJ_19806 PE=4 SV=1 - [A3B7I6_ORYSJ]	0	1.59	3	1	1	1	0.000224826	0.000175932	0.0290041	0.0448787	1.27791	0.353789
Os02g0656500	A0A0P0VMI3	Os02g0656500 protein (Fragment) OS=Oryza sativa subsp. japonica OX=39947 GN=Os02g0656500 PE=4 SV=1 - [A0A0P0VMI3_ORYSJ]	128.921	8.43	5	1	2	7	0.00017902	0.000140077	0.0349883	0.0495523	1.27801	0.353897
OsI_11856	B8AQL4	Uncharacterized protein OS=Oryza sativa subsp. indica OX=39946 GN=OsI_11856 PE=4 SV=1 - [B8AQL4_ORYSI]	153.481	23.37	3	4	4	8	0.000190738	0.000149228	0.0011376	0.011204	1.27816	0.354068
OsJ_25250	A3BMI4	Uncharacterized protein OS=Oryza sativa subsp. japonica OX=39947 GN=OsJ_25250 PE=3 SV=1 - [A3BMI4_ORYSJ]	31.58	9.22	2	1	1	1	0.000274589	0.000214803	0.0291142	0.0449664	1.27833	0.354257
Os01g0104100	Q658D5	Os01g0104100 protein OS=Oryza sativa subsp. japonica OX=39947 GN=Os01g0104100 PE=2 SV=1 - [Q658D5_ORYSJ]	112.164	26.45	7	7	7	8	0.000221653	0.000173358	0.000714561	0.00956776	1.27859	0.354549
OsI_25927	A2YL37	Uncharacterized protein OS=Oryza sativa subsp. indica OX=39946 GN=OsI_25927 PE=4 SV=1 - [A2YL37_ORYSI]	856.849	57.8	3	8	8	40	0.000206891	0.000161789	4.17671e-05	0.00498042	1.27877	0.354758
LOC_Os12g34890	Q2QPD1	Acyl carrier protein OS=Oryza sativa subsp. japonica OX=39947 GN=LOC_Os12g34890 PE=2 SV=2 - [Q2QPD1_ORYSJ]	136.867	11.11	2	1	1	3	0.000318244	0.0002488	0.0366914	0.0509406	1.27912	0.355148
OsJ_00995	B9EUI6	Uncharacterized protein OS=Oryza sativa subsp. japonica OX=39947 GN=OsJ_00995 PE=3 SV=1 - [B9EUI6_ORYSJ]	33.19	4.48	2	1	1	1	0.000175038	0.000136574	0.019446	0.0371232	1.28164	0.357986
LOC_Os03g63400	Q10AI8	Nascent polypeptide-associated complex subunit beta OS=Oryza sativa subsp. japonica OX=39947 GN=LOC_Os03g63400 PE=3 SV=1 - [Q10AI8_ORYSJ]	26.41	21.23	3	1	2	2	0.000272163	0.000212303	0.00350366	0.0181106	1.28196	0.358347
Os05g0545600	A0A0P0WQD6	Os05g0545600 protein OS=Oryza sativa subsp. japonica OX=39947 GN=Os05g0545600 PE=4 SV=1 - [A0A0P0WQD6_ORYSJ]	0	4.9	5	2	2	2	0.00024159	0.000188318	0.0196074	0.0372678	1.28288	0.359389
OsJ_05944	B9F4C9	Uncharacterized protein OS=Oryza sativa subsp. japonica OX=39947 GN=OsJ_05944 PE=4 SV=1 - [B9F4C9_ORYSJ]	201.409	16.91	2	7	8	25	0.00022731	0.000177179	0.0363917	0.0507004	1.28294	0.359455
Os07g0571100	Q0D5B0	Os07g0571100 protein (Fragment) OS=Oryza sativa subsp. japonica OX=39947 GN=Os07g0571100 PE=4 SV=1 - [Q0D5B0_ORYSJ]	24.36	4.13	5	4	4	4	0.000238004	0.000185339	0.0135141	0.032212	1.28416	0.360822
Os11g0142500	Q2RAP8	2-isopropylmalate synthase B, putative, expressed OS=Oryza sativa subsp. japonica OX=39947 GN=Os11g0142500 PE=3 SV=1 - [Q2RAP8_ORYSJ]	442.424	40.47	4	1	20	45	0.000159985	0.000124534	0.0022079	0.0149134	1.28467	0.361401
OsJ_01847	B9EWV6	Peroxidase OS=Oryza sativa subsp. japonica OX=39947 GN=OsJ_01847 PE=3 SV=1 - [B9EWV6_ORYSJ]	370.599	50.56	4	1	11	29	0.000225957	0.000175704	0.0404148	0.0537933	1.28601	0.362905
spdSyn3	B3GPG7	Spermidine synthase 3 OS=Oryza sativa subsp. japonica OX=39947 GN=spdSyn3 PE=2 SV=1 - [B3GPG7_ORYSJ]	74.697	14.11	4	4	5	6	0.000226156	0.00017582	0.00151434	0.0128294	1.2863	0.363223
OsI_14220	A2XNS3	Uncharacterized protein OS=Oryza sativa subsp. indica OX=39946 GN=OsI_14220 PE=4 SV=1 - [A2XNS3_ORYSI]	358.654	40.98	1	8	8	22	0.000210062	0.000163185	0.000750522	0.00973186	1.28727	0.36431
RPS27AA	Q9ARZ9	Ubiquitin-40S ribosomal protein S27a-1 OS=Oryza sativa subsp. japonica OX=39947 GN=RPS27AA PE=2 SV=1 - [R27AA_ORYSJ]	1159.69	60	41	3	10	139	0.000207093	0.000160775	0.00216678	0.0148137	1.2881	0.365239
Os06g0711600	Q5Z7Y7	GCIP-interacting family protein-like OS=Oryza sativa subsp. japonica OX=39947 GN=Os06g0711600 PE=2 SV=1 - [Q5Z7Y7_ORYSJ]	31.94	9.71	2	3	3	4	0.00022649	0.000175711	0.0170313	0.0350355	1.28899	0.366243
OS0EE2	Q40701	23 kDa polypeptide of photosystem II OS=Oryza sativa OX=4530 GN=OS0EE2 PE=2 SV=1 - [Q40701_ORYSA]	5337.87	38.89	2	1	12	402	0.000273077	0.000211765	0.0261866	0.042658	1.28953	0.366843
LOC_Os12g18900	Q2QTQ1	Cysteine desulfurase, putative, expressed OS=Oryza sativa subsp. japonica OX=39947 GN=LOC_Os12g18900 PE=4 SV=2 - [Q2QTQ1_ORYSJ]	74.7568	15.47	4	1	5	7	0.000225787	0.000175004	0.000741611	0.00969217	1.29018	0.367578
Os01g0233000	Q0JPA6	Salt stress root protein RS1 OS=Oryza sativa subsp. japonica OX=39947 GN=Os01g0233000 PE=2 SV=1 - [SRS1_ORYSJ]	500.5	75.49	2	16	16	63	0.000213944	0.000165711	0.0225054	0.0398375	1.29107	0.368563
Os07g0413800	B9FWT3	Os07g0413800 protein OS=Oryza sativa subsp. japonica OX=39947 GN=Os07g0413800 PE=4 SV=1 - [B9FWT3_ORYSJ]	58.5924	17.09	2	3	3	6	0.00033852	0.000262139	0.037913	0.0519033	1.29138	0.368909
OSJNBb0042K11.5	Q75GR3	Putative transcription elongation factor, 5'-partial (Fragment) OS=Oryza sativa subsp. japonica OX=39947 GN=OSJNBb0042K11.5 PE=4 SV=1 - [Q75GR3_ORYSJ]	0	2.54	2	1	1	1	0.000243086	0.000188054	0.00394269	0.019157	1.29264	0.370321
PLA2-II	Q9XG81	Probable phospholipase A2 homolog 2 OS=Oryza sativa subsp. japonica OX=39947 GN=PLA2-II PE=1 SV=1 - [PLA22_ORYSJ]	35.4	16.34	2	2	2	2	0.000266363	0.000205932	0.00537735	0.0218441	1.29345	0.371225
OsI_05457	A2WZR6	Uncharacterized protein OS=Oryza sativa subsp. indica OX=39946 GN=OsI_05457 PE=4 SV=1 - [A2WZR6_ORYSI]	47.4858	4.1	5	7	7	8	0.000236015	0.000182459	0.0192583	0.0369534	1.29352	0.371308
OsI_21182	A2Y814	Uncharacterized protein OS=Oryza sativa subsp. indica OX=39946 GN=OsI_21182 PE=3 SV=1 - [A2Y814_ORYSI]	30.65	5.3	2	2	2	2	0.000248568	0.000191907	0.00129144	0.0119145	1.29525	0.37323
OsJ_25788	A3BNZ2	Uncharacterized protein OS=Oryza sativa subsp. japonica OX=39947 GN=OsJ_25788 PE=4 SV=1 - [A3BNZ2_ORYSJ]	334.953	30.14	4	11	13	28	0.000229196	0.000176871	0.0169488	0.0349695	1.29583	0.373881
Os04g0692900	A0A0P0WH17	Os04g0692900 protein (Fragment) OS=Oryza sativa subsp. japonica OX=39947 GN=Os04g0692900 PE=4 SV=1 - [A0A0P0WH17_ORYSJ]	27.35	2.27	2	1	1	1	0.000322547	0.000248812	0.00170802	0.0135109	1.29635	0.374454
OsI_11140	B8AM01	Uncharacterized protein OS=Oryza sativa subsp. indica OX=39946 GN=OsI_11140 PE=4 SV=1 - [B8AM01_ORYSI]	78.1355	52.73	2	5	5	8	0.000229302	0.000176842	0.000563271	0.00880858	1.29665	0.374791
OsJ_06127	A3A568	Uncharacterized protein OS=Oryza sativa subsp. japonica OX=39947 GN=OsJ_06127 PE=4 SV=1 - [A3A568_ORYSJ]	516.893	22.9	3	17	35	60	0.000211981	0.000163407	0.000809189	0.00997842	1.29726	0.37547
OsI_35454	B8BJK6	Uncharacterized protein OS=Oryza sativa subsp. indica OX=39946 GN=OsI_35454 PE=4 SV=1 - [B8BJK6_ORYSI]	75.9156	7.5	5	4	4	8	0.000257072	0.000198123	0.0452954	0.057284	1.29754	0.375774
Os12g0540800	A0A0P0YAX1	Os12g0540800 protein (Fragment) OS=Oryza sativa subsp. japonica OX=39947 GN=Os12g0540800 PE=4 SV=1 - [A0A0P0YAX1_ORYSJ]	32.29	7.32	4	1	1	1	0.000212669	0.000163329	0.0426588	0.055435	1.30208	0.380823
Os03g0134900	Q8H8D6	Glutathione S-transferase, N-terminal domain containing protein, expressed OS=Oryza sativa subsp. japonica OX=39947 GN=Os03g0134900 PE=3 SV=1 - [Q8H8D6_ORYSJ]	1085.91	63.64	3	16	17	94	0.000242726	0.000186286	0.000569096	0.00884196	1.30298	0.38181
Os04g0443900	A0A0P0WAW0	Os04g0443900 protein OS=Oryza sativa subsp. japonica OX=39947 GN=Os04g0443900 PE=3 SV=1 - [A0A0P0WAW0_ORYSJ]	27.76	4.93	3	2	4	4	0.000179321	0.000137556	0.00121845	0.0115785	1.30362	0.382526
ALDH1a	Q9LRE9	Cytosolic aldehyde dehydrogenase OS=Oryza sativa subsp. japonica OX=39947 GN=ALDH1a PE=2 SV=1 - [Q9LRE9_ORYSJ]	305.434	42.83	6	17	21	39	0.000170817	0.000130981	0.000404431	0.00773702	1.30413	0.383091
OsI_01678	A2WPA3	Peroxidase OS=Oryza sativa subsp. indica OX=39946 GN=OsI_01678 PE=3 SV=1 - [A2WPA3_ORYSI]	250.32	18.83	76	1	6	24	0.00022276	0.000170803	0.00132338	0.0120555	1.30419	0.383157
rpl33	P0C457	50S ribosomal protein L33, chloroplastic OS=Oryza sativa subsp. japonica OX=39947 GN=rpl33 PE=3 SV=1 - [RK33_ORYSJ]	201.122	62.12	1	6	6	28	0.000233889	0.000179042	0.00206431	0.0145543	1.30633	0.385524
LOC_Os12g36180	Q2QNZ9	Expressed protein OS=Oryza sativa subsp. japonica OX=39947 GN=LOC_Os12g36180 PE=4 SV=1 - [Q2QNZ9_ORYSJ]	40.1505	4.22	7	4	4	4	0.000227582	0.000174088	0.00160753	0.013169	1.30728	0.386573
OSJNBa0028F23.19	Q6ATQ2	5-azacytidine resistance protein, putative, expressed OS=Oryza sativa subsp. japonica OX=39947 GN=OSJNBa0028F23.19 PE=4 SV=1 - [Q6ATQ2_ORYSJ]	39.5655	4.38	3	2	2	3	0.000197736	0.00015113	0.00734567	0.0249691	1.30838	0.387787
LOC_Os12g38170	Q2QND6	Os12g0569500 protein OS=Oryza sativa subsp. japonica OX=39947 GN=LOC_Os12g38170 PE=4 SV=1 - [Q2QND6_ORYSJ]	399.038	28.33	2	5	5	42	0.000227388	0.000173748	0.00562433	0.022229	1.30872	0.38816
MT3A	A2WLS0	Metallothionein-like protein 3A OS=Oryza sativa subsp. indica OX=39946 GN=MT3A PE=3 SV=1 - [MT3A_ORYSI]	145.14	93.55	6	3	6	20	0.000315819	0.000241245	0.0387788	0.0525695	1.30912	0.388597
OsI_18511	B8AY67	Kinesin-like protein OS=Oryza sativa subsp. indica OX=39946 GN=OsI_18511 PE=3 SV=1 - [B8AY67_ORYSI]	57.33	1.6	2	1	1	1	0.000209784	0.000160162	0.0151784	0.0336067	1.30982	0.389367
Os10g0188300	A0A0P0XSC2	Os10g0188300 protein (Fragment) OS=Oryza sativa subsp. japonica OX=39947 GN=Os10g0188300 PE=4 SV=1 - [A0A0P0XSC2_ORYSJ]	22.67	2.15	4	1	1	1	0.000221268	0.000168783	0.00327932	0.0175738	1.31096	0.390625
OsI_22855	A2YCL4	Uncharacterized protein OS=Oryza sativa subsp. indica OX=39946 GN=OsI_22855 PE=3 SV=1 - [A2YCL4_ORYSI]	57.6522	45.14	1	5	5	7	0.000204219	0.000155579	0.0178006	0.0356329	1.31263	0.392466
P0702E04.24-2	Q6YZD3	Lipid transfer protein-like OS=Oryza sativa subsp. japonica OX=39947 GN=P0702E04.24-2 PE=2 SV=1 - [Q6YZD3_ORYSJ]	50.3467	10.11	3	2	2	3	0.000273075	0.000207579	0.00609827	0.0230133	1.31552	0.395632
Os12g0538900	Q2QP84	Os12g0538900 protein OS=Oryza sativa subsp. japonica OX=39947 GN=Os12g0538900 PE=2 SV=1 - [Q2QP84_ORYSJ]	35.21	4.2	2	4	4	4	0.000251592	0.000191138	0.0079674	0.0258588	1.31628	0.396472
OsJ_03201	A2ZX29	Uncharacterized protein OS=Oryza sativa subsp. japonica OX=39947 GN=OsJ_03201 PE=3 SV=1 - [A2ZX29_ORYSJ]	31.4598	8.69	22	3	4	7	0.000232255	0.000176446	0.00281025	0.0164626	1.31629	0.396479
P0003H10.3	Q5NBS3	Putative COP9 signalosome complex subunit 2 OS=Oryza sativa subsp. japonica OX=39947 GN=P0003H10.3 PE=4 SV=1 - [Q5NBS3_ORYSJ]	36.61	9.93	3	4	4	4	0.00021888	0.000166242	0.000831773	0.010067	1.31664	0.396861
HSP18.0	Q5VRY1	18.0 kDa class II heat shock protein OS=Oryza sativa subsp. japonica OX=39947 GN=HSP18.0 PE=2 SV=1 - [HSP18_ORYSJ]	32.98	19.88	2	3	3	3	0.000280951	0.00021334	0.0133551	0.0320675	1.31692	0.397164
Os03g0749500	Q10CU4	Glycosyl hydrolase family 3 N terminal domain containing protein, expressed OS=Oryza sativa subsp. japonica OX=39947 GN=Os03g0749500 PE=2 SV=1 - [Q10CU4_ORYSJ]	125.4	12.78	3	4	7	9	0.000283555	0.000215229	0.0141738	0.0327896	1.31746	0.397755
OsJ_06717	B9EZZ3	Uncharacterized protein OS=Oryza sativa subsp. japonica OX=39947 GN=OsJ_06717 PE=4 SV=1 - [B9EZZ3_ORYSJ]	0	2.96	3	1	1	2	0.000193216	0.000146539	0.0111536	0.0298242	1.31852	0.398925
OsJ_28250	B9FYI2	Uncharacterized protein OS=Oryza sativa subsp. japonica OX=39947 GN=OsJ_28250 PE=4 SV=1 - [B9FYI2_ORYSJ]	28.83	0.83	2	1	1	1	0.000165671	0.000125284	0.00166472	0.0133665	1.32236	0.403114
OsI_03437	B8A8B7	Uncharacterized protein OS=Oryza sativa subsp. indica OX=39946 GN=OsI_03437 PE=4 SV=1 - [B8A8B7_ORYSI]	37.39	4.92	2	1	1	1	0.000217026	0.000164095	0.000894595	0.010297	1.32256	0.403335
OsJ_35269	B9GBY4	Uncharacterized protein OS=Oryza sativa subsp. japonica OX=39947 GN=OsJ_35269 PE=4 SV=1 - [B9GBY4_ORYSJ]	0	1.35	1	1	1	1	0.0002487	0.000187905	0.0122638	0.0310153	1.32354	0.404401
OsI_21251	B8AXI7	Uncharacterized protein OS=Oryza sativa subsp. indica OX=39946 GN=OsI_21251 PE=4 SV=1 - [B8AXI7_ORYSI]	49.3066	15.15	5	6	6	7	0.000222335	0.000167962	0.0112672	0.0299515	1.32372	0.404601
P0401G10.25-2	Q5JN26	Os01g0960400 protein OS=Oryza sativa subsp. japonica OX=39947 GN=P0401G10.25-2 PE=3 SV=1 - [Q5JN26_ORYSJ]	29.76	5.26	15	2	2	2	0.000235678	0.000177837	0.010454	0.0290423	1.32525	0.406265
Os07g0656800	Q0D402	Os07g0656800 protein OS=Oryza sativa subsp. japonica OX=39947 GN=Os07g0656800 PE=2 SV=1 - [Q0D402_ORYSJ]	88.4452	10.81	2	1	1	2	0.000285289	0.000214893	0.00266235	0.0160707	1.32759	0.408805
OsJ_19628	B9FLQ7	Uncharacterized protein OS=Oryza sativa subsp. japonica OX=39947 GN=OsJ_19628 PE=3 SV=1 - [B9FLQ7_ORYSJ]	321.39	30.48	10	4	15	42	0.000197882	0.000148779	2.69769e-05	0.00472255	1.33004	0.411474
OSJNBa0075N02.121	Q7EY44	Water-stress protein-like protein OS=Oryza sativa subsp. japonica OX=39947 GN=OSJNBa0075N02.121 PE=4 SV=1 - [Q7EY44_ORYSJ]	0	1.94	2	1	1	1	0.000219543	0.000165026	0.0264388	0.0428348	1.33035	0.41181
Os01g0328500	Q0JN48	Os01g0328500 protein OS=Oryza sativa subsp. japonica OX=39947 GN=Os01g0328500 PE=4 SV=1 - [Q0JN48_ORYSJ]	0	10.23	3	3	3	3	0.000257815	0.000193393	0.0083279	0.0263395	1.33312	0.414806
OsI_36419	B8BKY7	Uncharacterized protein OS=Oryza sativa subsp. indica OX=39946 GN=OsI_36419 PE=4 SV=1 - [B8BKY7_ORYSI]	37.7176	12.23	18	3	4	6	0.000211791	0.000158778	0.000774556	0.00983588	1.33388	0.415631
Os03g0290300	Q0DSS9	Os03g0290300 protein (Fragment) OS=Oryza sativa subsp. japonica OX=39947 GN=Os03g0290300 PE=4 SV=1 - [Q0DSS9_ORYSJ]	36.08	3.26	4	1	1	1	0.000253738	0.00019006	0.00677019	0.0240842	1.33504	0.416886
OsI_16033	B8AUC1	Uncharacterized protein OS=Oryza sativa subsp. indica OX=39946 GN=OsI_16033 PE=4 SV=1 - [B8AUC1_ORYSI]	78.2842	9.24	1	1	5	7	0.000195904	0.000146718	0.000272833	0.00675083	1.33524	0.417104
Os01g0805000	Q0JIF8	Os01g0805000 protein (Fragment) OS=Oryza sativa subsp. japonica OX=39947 GN=Os01g0805000 PE=3 SV=1 - [Q0JIF8_ORYSJ]	25.3968	7.37	2	1	1	4	0.000195406	0.000146308	0.00133055	0.0120866	1.33558	0.417469
OsI_00202	A2WK53	Uncharacterized protein OS=Oryza sativa subsp. indica OX=39946 GN=OsI_00202 PE=3 SV=1 - [A2WK53_ORYSI]	0	16.57	3	3	3	5	0.000290488	0.000217115	0.0453228	0.0573027	1.33795	0.420022
prx16	Q9AS12	Peroxidase OS=Oryza sativa subsp. japonica OX=39947 GN=prx16 PE=3 SV=1 - [Q9AS12_ORYSJ]	338.347	25.36	65	6	9	36	0.000238969	0.000178605	0.0188218	0.0365519	1.33797	0.420047
CAB2R	P12331	Chlorophyll a-b binding protein 2, chloroplastic OS=Oryza sativa subsp. japonica OX=39947 GN=CAB2R PE=2 SV=2 - [CB22_ORYSJ]	3073.86	60.15	3	3	10	290	0.000297615	0.000222397	0.00630586	0.0233578	1.33822	0.42031
OsI_37072	A2ZH16	Uncharacterized protein OS=Oryza sativa subsp. indica OX=39946 GN=OsI_37072 PE=4 SV=1 - [A2ZH16_ORYSI]	0	7.93	2	1	1	1	0.00024282	0.00018116	0.0089447	0.0271288	1.34036	0.422624
B0403H10-OSIGBa0105A11.14	Q01HT4	B0403H10-OSIGBa0105A11.14 protein OS=Oryza sativa OX=4530 GN=B0403H10-OSIGBa0105A11.14 PE=4 SV=1 - [Q01HT4_ORYSA]	58.6023	37.67	6	6	6	7	0.000213645	0.000159107	0.002898	0.0166859	1.34278	0.425222
Os03g0107000	A0A0P0VS32	Os03g0107000 protein OS=Oryza sativa subsp. japonica OX=39947 GN=Os03g0107000 PE=3 SV=1 - [A0A0P0VS32_ORYSJ]	0	5	4	1	1	1	0.000199476	0.000148211	0.0109612	0.0296151	1.34589	0.428564
P0498E12.113	Q7EZC9	Nucleolar GTP-binding protein 1-like OS=Oryza sativa subsp. japonica OX=39947 GN=P0498E12.113 PE=4 SV=1 - [Q7EZC9_ORYSJ]	27.83	3.02	1	1	1	1	0.000170047	0.000126275	0.00714953	0.0246765	1.34664	0.42936
Os01g0235100	A0A0P0V022	Os01g0235100 protein OS=Oryza sativa subsp. japonica OX=39947 GN=Os01g0235100 PE=4 SV=1 - [A0A0P0V022_ORYSJ]	54.7362	29.78	5	3	3	4	0.000210999	0.000156668	0.0233654	0.0405393	1.34679	0.429524
OsI_24461	A2YGZ6	Uncharacterized protein OS=Oryza sativa subsp. indica OX=39946 GN=OsI_24461 PE=4 SV=1 - [A2YGZ6_ORYSI]	92.2959	6.22	2	1	1	3	0.000186882	0.000138749	0.00751984	0.0252258	1.34691	0.429649
P0034A04.133	Q84NP4	Uncharacterized protein P0034A04.133 OS=Oryza sativa subsp. japonica OX=39947 GN=P0034A04.133 PE=4 SV=1 - [Q84NP4_ORYSJ]	22.16	0.74	3	1	1	1	0.000249572	0.000185093	0.00892881	0.0271068	1.34836	0.431207
OSJNBb0081B07.6	Q852B8	Pentatricopeptide, putative, expressed OS=Oryza sativa subsp. japonica OX=39947 GN=OSJNBb0081B07.6 PE=4 SV=1 - [Q852B8_ORYSJ]	60.25	8	4	6	6	7	0.000206671	0.000153265	0.000156142	0.00619778	1.34846	0.431308
OsI_30537	B8BD98	Ferredoxin-thioredoxin reductase, catalytic chain OS=Oryza sativa subsp. indica OX=39946 GN=OsI_30537 PE=3 SV=1 - [B8BD98_ORYSI]	206.448	53.42	2	7	7	19	0.00019777	0.000146365	0.00069686	0.00948299	1.35121	0.434257
OsI_03626	B8A914	Uncharacterized protein OS=Oryza sativa subsp. indica OX=39946 GN=OsI_03626 PE=4 SV=1 - [B8A914_ORYSI]	0	9.73	1	1	1	1	0.000248711	0.000183722	0.0274373	0.043595	1.35373	0.436944
OJ1116_E04.5	Q6K987	Endoribonuclease L-PSP family protein-like OS=Oryza sativa subsp. japonica OX=39947 GN=OJ1116_E04.5 PE=4 SV=1 - [Q6K987_ORYSJ]	36.23	1.5	2	1	1	2	0.000260574	0.000192437	0.0151267	0.0335663	1.35407	0.437306
OsI_16851	A2XW27	Uncharacterized protein OS=Oryza sativa subsp. indica OX=39946 GN=OsI_16851 PE=4 SV=1 - [A2XW27_ORYSI]	39.82	5.09	5	3	3	6	0.000185329	0.000136844	0.0159029	0.0341536	1.35431	0.437555
Os02g0814900	Q0DWH7	Nicotinamide/nicotinic acid mononucleotide adenylyltransferase OS=Oryza sativa subsp. japonica OX=39947 GN=Os02g0814900 PE=3 SV=2 - [NMNAT_ORYSJ]	0	3.21	2	1	1	1	0.00022551	0.000166141	0.0157306	0.0340266	1.35734	0.440784
Os04g0561600	Q0JB20	Os04g0561600 protein OS=Oryza sativa subsp. japonica OX=39947 GN=Os04g0561600 PE=4 SV=1 - [Q0JB20_ORYSJ]	31.89	7.26	5	2	2	3	0.000218295	0.000160653	0.000256256	0.00669908	1.3588	0.442334
OsI_10295	A2XDB2	Uncharacterized protein OS=Oryza sativa subsp. indica OX=39946 GN=OsI_10295 PE=4 SV=1 - [A2XDB2_ORYSI]	26.95	13.6	1	2	2	3	0.000241114	0.000177432	6.6994e-05	0.00537782	1.35891	0.442451
OsI_20004	B8AYC4	Uncharacterized protein OS=Oryza sativa subsp. indica OX=39946 GN=OsI_20004 PE=4 SV=1 - [B8AYC4_ORYSI]	41.77	14.2	2	4	4	5	0.000222335	0.000163326	0.00983204	0.0282941	1.36129	0.444978
OsI_10369	A2XDI0	Cytochrome b561 and DOMON domain-containing protein OS=Oryza sativa subsp. indica OX=39946 GN=OsI_10369 PE=4 SV=1 - [A2XDI0_ORYSI]	29.83	11.72	4	3	3	3	0.00018329	0.000134365	0.00162219	0.0132204	1.36412	0.44797
OsI_32066	A2Z367	Uncharacterized protein OS=Oryza sativa subsp. indica OX=39946 GN=OsI_32066 PE=4 SV=1 - [A2Z367_ORYSI]	0	48	1	4	4	5	0.000255418	0.00018709	0.00103083	0.0107259	1.36521	0.449123
OsI_07959	B8AF14	Uncharacterized protein OS=Oryza sativa subsp. indica OX=39946 GN=OsI_07959 PE=4 SV=1 - [B8AF14_ORYSI]	21.18	1.26	3	1	1	1	0.000227474	0.000166412	0.0113369	0.0300293	1.36693	0.450942
OsI_37102	B8BIM3	Uncharacterized protein OS=Oryza sativa subsp. indica OX=39946 GN=OsI_37102 PE=3 SV=1 - [B8BIM3_ORYSI]	0	11.02	2	1	1	1	0.000202826	0.000147988	7.88569e-05	0.00554248	1.37056	0.454767
OsI_31764	B8BCV5	Uncharacterized protein OS=Oryza sativa subsp. indica OX=39946 GN=OsI_31764 PE=3 SV=1 - [B8BCV5_ORYSI]	0	8.07	2	4	4	4	0.000169724	0.000123804	0.00428699	0.0198937	1.37091	0.455134
OsI_13529	A2XM21	Uncharacterized protein OS=Oryza sativa subsp. indica OX=39946 GN=OsI_13529 PE=3 SV=1 - [A2XM21_ORYSI]	546.276	53.98	2	1	13	55	0.000236898	0.000172764	0.000420907	0.0078629	1.37122	0.455459
OsI_13062	B8APK7	Uncharacterized protein OS=Oryza sativa subsp. indica OX=39946 GN=OsI_13062 PE=4 SV=1 - [B8APK7_ORYSI]	38.6029	21.43	2	2	2	2	0.0003008	0.000219244	0.0371628	0.0513153	1.37199	0.456266
OJ1005_B10.16	Q7EZN6	Uncharacterized protein OJ1005_B10.16 OS=Oryza sativa subsp. japonica OX=39947 GN=OJ1005_B10.16 PE=3 SV=1 - [Q7EZN6_ORYSJ]	29.61	1	4	1	1	1	0.000185867	0.00013536	0.00179461	0.0137872	1.37313	0.45747
Os09g0491772	B9G4B3	Os09g0491772 protein OS=Oryza sativa subsp. japonica OX=39947 GN=Os09g0491772 PE=3 SV=1 - [B9G4B3_ORYSJ]	286.302	19.44	2	6	11	27	0.000171743	0.000125049	0.00508381	0.0213685	1.3734	0.457753
Os12g0163800	Q2QXA8	Os12g0163800 protein OS=Oryza sativa subsp. japonica OX=39947 GN=Os12g0163800 PE=2 SV=1 - [Q2QXA8_ORYSJ]	45.61	2.81	2	1	1	1	0.00030157	0.000219183	0.00139374	0.0123538	1.37588	0.460357
OsI_21304	B8B1I1	Uncharacterized protein OS=Oryza sativa subsp. indica OX=39946 GN=OsI_21304 PE=4 SV=1 - [B8B1I1_ORYSI]	41.13	4.85	3	1	1	2	0.000243414	0.000175989	0.0126799	0.0314294	1.38312	0.467927
OsI_24825	B8B742	Uncharacterized protein OS=Oryza sativa subsp. indica OX=39946 GN=OsI_24825 PE=4 SV=1 - [B8B742_ORYSI]	75.9141	4.2	3	6	6	7	0.00027983	0.000202098	0.00165151	0.0133216	1.38463	0.469497
OsI_11921	A2XHN4	Uncharacterized protein OS=Oryza sativa subsp. indica OX=39946 GN=OsI_11921 PE=3 SV=1 - [A2XHN4_ORYSI]	39.65	7.52	3	3	3	3	0.00025857	0.000186435	0.0463654	0.0580065	1.38692	0.471883
P0544B02.29-2	Q6ETK6	Putative U2-associated SR140 protein OS=Oryza sativa subsp. japonica OX=39947 GN=P0544B02.29-2 PE=4 SV=1 - [Q6ETK6_ORYSJ]	35.3	2.73	6	3	3	4	0.000249849	0.000179815	0.00222511	0.0149544	1.38947	0.474539
Os04g0208200	Q0JES7	Os04g0208200 protein (Fragment) OS=Oryza sativa subsp. japonica OX=39947 GN=Os04g0208200 PE=3 SV=1 - [Q0JES7_ORYSJ]	41.12	7.31	4	1	1	1	0.000198105	0.000142252	0.00136724	0.0122434	1.39263	0.477815
OsJ_07542	B9F140	Uncharacterized protein OS=Oryza sativa subsp. japonica OX=39947 GN=OsJ_07542 PE=4 SV=1 - [B9F140_ORYSJ]	24.15	2.98	4	2	2	2	0.000248491	0.000178427	0.00325646	0.0175241	1.39268	0.47786
Os03g0737900	Q0DNR8	Os03g0737900 protein OS=Oryza sativa subsp. japonica OX=39947 GN=Os03g0737900 PE=4 SV=1 - [Q0DNR8_ORYSJ]	42.46	7.23	3	1	1	1	0.000330054	0.000236834	0.0151584	0.0335911	1.39361	0.478824
OsI_28114	A2YS16	Uncharacterized protein OS=Oryza sativa subsp. indica OX=39946 GN=OsI_28114 PE=4 SV=1 - [A2YS16_ORYSI]	47.8459	9.79	3	6	6	7	0.000202638	0.000145385	0.00537278	0.021837	1.3938	0.479022
OsI_35332	A2ZC27	Dirigent protein OS=Oryza sativa subsp. indica OX=39946 GN=OsI_35332 PE=3 SV=1 - [A2ZC27_ORYSI]	44.5381	16.48	2	2	3	5	0.000272284	0.000195045	0.0266745	0.0429984	1.39601	0.481304
OsI_30534	A2YYX1	Uncharacterized protein OS=Oryza sativa subsp. indica OX=39946 GN=OsI_30534 PE=4 SV=1 - [A2YYX1_ORYSI]	0	4.36	5	3	3	3	0.000268085	0.000191968	0.00422565	0.0197673	1.39651	0.481824
OsI_18557	A2Y0N3	Uncharacterized protein OS=Oryza sativa subsp. indica OX=39946 GN=OsI_18557 PE=4 SV=1 - [A2Y0N3_ORYSI]	0	11.97	1	1	1	3	0.000260371	0.000186341	0.0268446	0.0431154	1.39728	0.482618
OsI_04247	A2WWG7	Non-specific lipid-transfer protein OS=Oryza sativa subsp. indica OX=39946 GN=OsI_04247 PE=3 SV=1 - [A2WWG7_ORYSI]	0	17.5	1	2	2	3	0.000286407	0.000204796	0.00269602	0.0161615	1.3985	0.483881
Os01g0618400	Q5ZBH5	DEAD-box ATP-dependent RNA helicase 25 OS=Oryza sativa subsp. japonica OX=39947 GN=Os01g0618400 PE=2 SV=1 - [RH25_ORYSJ]	279.902	29.46	8	14	14	21	0.000155666	0.000111252	0.000285744	0.00678744	1.39922	0.484622
Os01g0174000	Q0JQA4	Os01g0174000 protein OS=Oryza sativa subsp. japonica OX=39947 GN=Os01g0174000 PE=4 SV=1 - [Q0JQA4_ORYSJ]	94.5871	33	5	4	6	6	0.000257334	0.000183495	0.0261004	0.042597	1.4024	0.487901
Os09g0130800	Q0J3D0	Os09g0130800 protein OS=Oryza sativa subsp. japonica OX=39947 GN=Os09g0130800 PE=2 SV=1 - [Q0J3D0_ORYSJ]	140.335	19.37	6	13	15	18	0.000193417	0.000137846	0.000525609	0.00858175	1.40314	0.488658
OsI_02435	A2WRE6	Uncharacterized protein OS=Oryza sativa subsp. indica OX=39946 GN=OsI_02435 PE=4 SV=1 - [A2WRE6_ORYSI]	25.61	17.19	2	4	4	4	0.00023538	0.000167152	0.0144827	0.0330485	1.40818	0.49383
OsI_02576	B8AAR4	Uncharacterized protein OS=Oryza sativa subsp. indica OX=39946 GN=OsI_02576 PE=4 SV=1 - [B8AAR4_ORYSI]	23.2	5.49	4	1	1	1	0.00020683	0.000146812	0.000845247	0.0101183	1.40881	0.494476
OsI_14139	A2XNJ4	Uncharacterized protein OS=Oryza sativa subsp. indica OX=39946 GN=OsI_14139 PE=4 SV=1 - [A2XNJ4_ORYSI]	0	2.73	1	1	1	1	0.000232747	0.00016436	0.00212287	0.0147045	1.41608	0.501905
RPS8	P49199	40S ribosomal protein S8 OS=Oryza sativa subsp. japonica OX=39947 GN=RPS8 PE=2 SV=2 - [RS8_ORYSJ]	496.984	43.64	3	4	11	31	0.000238848	0.000168373	0.00990163	0.0283805	1.41857	0.504435
OsJ_32069	A3C682	Glutamyl-tRNA reductase OS=Oryza sativa subsp. japonica OX=39947 GN=OsJ_32069 PE=3 SV=1 - [A3C682_ORYSJ]	26.39	2.11	3	1	1	1	0.000196124	0.000138175	0.000285898	0.00678786	1.41939	0.505275
OSIGBa0135C09.5	A0B9X9	OSIGBa0135C09.5 protein OS=Oryza sativa OX=4530 GN=OSIGBa0135C09.5 PE=4 SV=1 - [A0B9X9_ORYSA]	38.8	13.77	2	1	4	4	0.000222089	0.000156109	0.0237532	0.0408467	1.42265	0.508581
H0613H07.5	Q01MK8	H0613H07.5 protein OS=Oryza sativa OX=4530 GN=H0613H07.5 PE=4 SV=1 - [Q01MK8_ORYSA]	1598.42	53.14	10	3	42	160	0.000205794	0.000144228	0.00771504	0.025507	1.42686	0.512849
OsI_31339	B8BF75	Uncharacterized protein OS=Oryza sativa subsp. indica OX=39946 GN=OsI_31339 PE=4 SV=1 - [B8BF75_ORYSI]	236.509	25.12	4	2	12	17	0.000236455	0.000165704	0.00531857	0.0217515	1.42697	0.512957
OsI_18328	B8AXM0	Uncharacterized protein OS=Oryza sativa subsp. indica OX=39946 GN=OsI_18328 PE=4 SV=1 - [B8AXM0_ORYSI]	0	5.59	1	1	1	1	0.000202959	0.000141844	0.00702136	0.0244803	1.43086	0.516883
LOC_Os10g40750	Q94LR2	Expressed protein OS=Oryza sativa subsp. japonica OX=39947 GN=LOC_Os10g40750 PE=4 SV=1 - [Q94LR2_ORYSJ]	50.09	8.33	2	2	2	2	0.000209616	0.00014634	0.0490395	0.0597459	1.43239	0.518422
OsI_03319	B8A7N9	Uncharacterized protein OS=Oryza sativa subsp. indica OX=39946 GN=OsI_03319 PE=4 SV=1 - [B8A7N9_ORYSI]	0	3.47	3	1	1	1	0.000201454	0.000140534	0.0238772	0.0409438	1.43349	0.519532
OsJ_14627	A3ATD8	Uncharacterized protein OS=Oryza sativa subsp. japonica OX=39947 GN=OsJ_14627 PE=4 SV=1 - [A3ATD8_ORYSJ]	26.32	13.56	4	1	1	2	0.000280836	0.000195549	0.0247716	0.0416287	1.43614	0.522201
OsI_21180	A2Y812	Uncharacterized protein OS=Oryza sativa subsp. indica OX=39946 GN=OsI_21180 PE=4 SV=1 - [A2Y812_ORYSI]	46.57	1.59	3	1	1	1	0.000181144	0.000126005	0.00644888	0.0235878	1.4376	0.523659
LOC_Os03g55874	Q10EJ0	ATP synthase beta chain, putative OS=Oryza sativa subsp. japonica OX=39947 GN=LOC_Os03g55874 PE=3 SV=1 - [Q10EJ0_ORYSJ]	5906.58	69.79	3	1	18	483	0.000271253	0.000188637	0.000347174	0.00724811	1.43796	0.524021
OsI_31351	A2Z174	Uncharacterized protein OS=Oryza sativa subsp. indica OX=39946 GN=OsI_31351 PE=4 SV=1 - [A2Z174_ORYSI]	0	5.06	2	2	2	3	0.00022018	0.000152623	0.0149493	0.0334265	1.44264	0.528714
OsJ_10173	B9F6U3	Uncharacterized protein OS=Oryza sativa subsp. japonica OX=39947 GN=OsJ_10173 PE=4 SV=1 - [B9F6U3_ORYSJ]	0	6.67	3	2	2	3	0.000266767	0.000184747	0.00509527	0.0213877	1.44396	0.53003
Os07g0173300	Q0D8A5	Os07g0173300 protein (Fragment) OS=Oryza sativa subsp. japonica OX=39947 GN=Os07g0173300 PE=4 SV=1 - [Q0D8A5_ORYSJ]	53.74	5.76	3	1	1	1	0.000276093	0.000191111	0.00321572	0.0174344	1.44468	0.530747
OsI_13038	B8APJ2	Uncharacterized protein OS=Oryza sativa subsp. indica OX=39946 GN=OsI_13038 PE=4 SV=1 - [B8APJ2_ORYSI]	28.74	8.81	2	2	2	2	0.000275585	0.000190562	0.0143589	0.0329456	1.44617	0.532237
Os04g0685100	Q7XPU3	Ribosome biogenesis regulatory protein OS=Oryza sativa subsp. japonica OX=39947 GN=Os04g0685100 PE=3 SV=1 - [Q7XPU3_ORYSJ]	39.55	6.36	5	1	2	2	0.000190814	0.000131875	0.0168449	0.0348857	1.44693	0.532998
OsI_20063	B8AYI9	Uncharacterized protein OS=Oryza sativa subsp. indica OX=39946 GN=OsI_20063 PE=4 SV=1 - [B8AYI9_ORYSI]	30.34	4.85	2	2	2	2	0.000196422	0.000135735	0.00333887	0.0177015	1.4471	0.533162
Os05g0182201	A0A0P0WIZ3	Hypoxanthine phosphoribosyltransferase OS=Oryza sativa subsp. japonica OX=39947 GN=Os05g0182201 PE=3 SV=1 - [A0A0P0WIZ3_ORYSJ]	36.95	10.34	1	2	2	2	0.000274458	0.000188906	0.0252073	0.0419525	1.45288	0.538916
OsI_27624	B8BAD1	Uncharacterized protein OS=Oryza sativa subsp. indica OX=39946 GN=OsI_27624 PE=4 SV=1 - [B8BAD1_ORYSI]	46.23	9.15	1	4	4	4	0.000233584	0.000160533	0.010513	0.0291106	1.45506	0.541074
Os01g0679700	P0DKK1	60S ribosomal protein L37a-1 OS=Oryza sativa subsp. japonica OX=39947 GN=Os01g0679700 PE=1 SV=1 - [RL371_ORYSJ]	80.6232	34.78	2	3	3	11	0.000210716	0.000143893	0.00662637	0.0238654	1.4644	0.550308
OsI_11682	A2XH06	Uncharacterized protein OS=Oryza sativa subsp. indica OX=39946 GN=OsI_11682 PE=4 SV=1 - [A2XH06_ORYSI]	49.17	9.49	5	1	1	1	0.000219671	0.000149999	0.0229635	0.0402148	1.46448	0.550392
OSJNBb0020J19.12	Q7XK98	OSJNBb0020J19.12 protein OS=Oryza sativa subsp. japonica OX=39947 GN=OSJNBb0020J19.12 PE=4 SV=2 - [Q7XK98_ORYSJ]	81.439	18.66	4	3	3	5	0.000196411	0.000134004	0.00160803	0.0131707	1.46571	0.551602
Os12g0115500	Q0IQK7	Non-specific lipid-transfer protein (Fragment) OS=Oryza sativa subsp. japonica OX=39947 GN=Os12g0115500 PE=3 SV=2 - [Q0IQK7_ORYSJ]	434.499	54.84	5	4	5	31	0.000291672	0.000198806	0.0161891	0.0343608	1.46712	0.552985
OsI_09938	A2XCA8	Uncharacterized protein OS=Oryza sativa subsp. indica OX=39946 GN=OsI_09938 PE=4 SV=1 - [A2XCA8_ORYSI]	0	5.53	2	1	1	1	0.000172386	0.000117028	0.000365358	0.00741279	1.47304	0.558798
Os03g0856100	Q75IP7	Os03g0856100 protein OS=Oryza sativa subsp. japonica OX=39947 GN=Os03g0856100 PE=4 SV=1 - [Q75IP7_ORYSJ]	36.4224	4.69	3	3	3	4	0.000148645	0.000100777	0.000181072	0.00636565	1.47499	0.560702
OsJ_00494	B9ET09	Uncharacterized protein OS=Oryza sativa subsp. japonica OX=39947 GN=OsJ_00494 PE=4 SV=1 - [B9ET09_ORYSJ]	104.965	10.37	2	4	4	6	0.000279485	0.000189301	0.0245698	0.0414766	1.4764	0.562089
CAL1	Q6K209	Defensin-like protein CAL1 OS=Oryza sativa subsp. japonica OX=39947 GN=CAL1 PE=1 SV=1 - [CAL1_ORYSJ]	42.7855	30	2	2	2	6	0.000296863	0.000200868	0.0266994	0.0430156	1.4779	0.563552
OsI_02893	A2WSP8	Uncharacterized protein OS=Oryza sativa subsp. indica OX=39946 GN=OsI_02893 PE=4 SV=1 - [A2WSP8_ORYSI]	0	10.26	1	1	1	1	0.000313913	0.00021228	0.00857082	0.0266498	1.47877	0.564399
OsI_20582	A2Y6E9	Uncharacterized protein OS=Oryza sativa subsp. indica OX=39946 GN=OsI_20582 PE=4 SV=1 - [A2Y6E9_ORYSI]	27.12	3.73	1	1	1	1	0.000331863	0.000223883	0.0473988	0.0586897	1.48231	0.567844
LOC_Os11g28270	H2KWI5	Zinc finger CCCH type domain containing protein ZFN, putative, expressed OS=Oryza sativa subsp. japonica OX=39947 GN=LOC_Os11g28270 PE=4 SV=1 - [H2KWI5_ORYSJ]	40.67	2.96	4	1	1	2	0.000274161	0.000184932	0.0329094	0.0478154	1.48249	0.568023
OsI_35751	A2ZD86	Uncharacterized protein OS=Oryza sativa subsp. indica OX=39946 GN=OsI_35751 PE=4 SV=1 - [A2ZD86_ORYSI]	45.94	6.96	2	2	2	3	0.000141057	9.50916e-05	2.60361e-05	0.00469773	1.48338	0.568888
LOC_Os03g22740	Q10LH4	Nucleolar protein NOP5, putative, expressed OS=Oryza sativa subsp. japonica OX=39947 GN=LOC_Os03g22740 PE=2 SV=1 - [Q10LH4_ORYSJ]	210.996	34.33	4	7	16	18	0.000254806	0.000171293	0.00316197	0.017314	1.48755	0.572934
PSA2	Q6YUA8	Protein PHOTOSYSTEM I ASSEMBLY 2, chloroplastic OS=Oryza sativa subsp. japonica OX=39947 GN=PSA2 PE=2 SV=1 - [PSA22_ORYSJ]	73.9848	26.2	1	4	4	6	0.000292963	0.000196358	0.0447283	0.0568948	1.49198	0.57723
Os02g0162400	Q6H7T2	Os02g0162400 protein OS=Oryza sativa subsp. japonica OX=39947 GN=Os02g0162400 PE=4 SV=1 - [Q6H7T2_ORYSJ]	35.0123	16.82	2	2	2	3	0.000287668	0.000192623	0.0153459	0.0337361	1.49342	0.57862
Os05g0477300	Q0DHB9	40S ribosomal protein S26 OS=Oryza sativa subsp. japonica OX=39947 GN=Os05g0477300 PE=2 SV=1 - [Q0DHB9_ORYSJ]	124.482	45.59	3	4	7	15	0.000280921	0.000187982	0.000888466	0.0102756	1.49441	0.579571
Os01g0959000	Q5JN45	Os01g0959000 protein OS=Oryza sativa subsp. japonica OX=39947 GN=Os01g0959000 PE=2 SV=1 - [Q5JN45_ORYSJ]	28.69	3.47	3	2	2	3	0.000290648	0.000194097	0.00249924	0.0156259	1.49744	0.582497
OsI_21642	A2Y9A3	Uncharacterized protein OS=Oryza sativa subsp. indica OX=39946 GN=OsI_21642 PE=4 SV=1 - [A2Y9A3_ORYSI]	62.89	5.91	1	1	1	1	0.000181555	0.000120714	0.00479429	0.0208659	1.504	0.588805
OsI_38809	B8BML4	Uncharacterized protein OS=Oryza sativa subsp. indica OX=39946 GN=OsI_38809 PE=4 SV=1 - [B8BML4_ORYSI]	39.09	11.24	2	1	1	1	0.000263402	0.000175132	0.0291755	0.0450151	1.50402	0.58882
OsI_16976	B8ASY3	Uncharacterized protein OS=Oryza sativa subsp. indica OX=39946 GN=OsI_16976 PE=4 SV=1 - [B8ASY3_ORYSI]	0	4.06	2	3	3	3	0.000160643	0.000106783	0.00151054	0.012815	1.50439	0.589182
Os06g0704200	C7J4C3	Os06g0704200 protein (Fragment) OS=Oryza sativa subsp. japonica OX=39947 GN=Os06g0704200 PE=4 SV=1 - [C7J4C3_ORYSJ]	28.3	6.19	2	1	1	1	0.000274442	0.00018237	0.0137563	0.0324281	1.50486	0.589634
OsI_28872	A2YU61	Uncharacterized protein OS=Oryza sativa subsp. indica OX=39946 GN=OsI_28872 PE=4 SV=1 - [A2YU61_ORYSI]	249.825	35.48	2	4	4	17	0.000219698	0.000145814	0.0045999	0.020508	1.5067	0.591389
OsJ_32917	A3C8I0	Uncharacterized protein OS=Oryza sativa subsp. japonica OX=39947 GN=OsJ_32917 PE=3 SV=1 - [A3C8I0_ORYSJ]	43.7011	1.64	8	1	1	2	0.000257606	0.000170347	0.000209331	0.00651485	1.51224	0.596691
OsI_17791	A2XYL4	Uncharacterized protein OS=Oryza sativa subsp. indica OX=39946 GN=OsI_17791 PE=4 SV=1 - [A2XYL4_ORYSI]	34.03	2.9	2	1	1	1	0.000207674	0.000137065	0.0104074	0.028988	1.51515	0.599461
HWC1	I4DI94	HWC1 protein OS=Oryza sativa subsp. japonica OX=39947 GN=HWC1 PE=4 SV=1 - [I4DI94_ORYSJ]	0	2.51	4	2	2	2	0.000275145	0.000181302	0.0101185	0.0286453	1.51761	0.601798
ZHD6	Q688U3	Zinc-finger homeodomain protein 6 OS=Oryza sativa subsp. japonica OX=39947 GN=ZHD6 PE=2 SV=1 - [ZHD6_ORYSJ]	36.9	10.2	2	2	2	2	0.000265235	0.000174533	0.00399404	0.0192712	1.51969	0.603778
OSJNBa0027P08.10	Q7XUW6	OSJNBa0027P08.10 protein OS=Oryza sativa subsp. japonica OX=39947 GN=OSJNBa0027P08.10 PE=4 SV=2 - [Q7XUW6_ORYSJ]	141.56	45.27	4	6	6	19	0.000234288	0.000153566	0.00101778	0.0106884	1.52565	0.609428
Os06g0574450	A0A0P0WY77	Os06g0574450 protein OS=Oryza sativa subsp. japonica OX=39947 GN=Os06g0574450 PE=4 SV=1 - [A0A0P0WY77_ORYSJ]	37.5	3.02	3	1	1	1	0.000275514	0.000180102	0.00916215	0.0274259	1.52976	0.613308
OsI_04630	A2WXH9	Uncharacterized protein OS=Oryza sativa subsp. indica OX=39946 GN=OsI_04630 PE=3 SV=1 - [A2WXH9_ORYSI]	31.78	3.83	1	1	2	2	0.000321638	0.00020946	0.0172146	0.0351808	1.53556	0.618763
OsI_07431	A2X5F3	Uncharacterized protein OS=Oryza sativa subsp. indica OX=39946 GN=OsI_07431 PE=4 SV=1 - [A2X5F3_ORYSI]	1603.72	53.14	9	3	42	157	0.000191582	0.000124678	0.0153437	0.0337344	1.53661	0.619753
LTP	Q0IQK9	Non-specific lipid-transfer protein 1 OS=Oryza sativa subsp. japonica OX=39947 GN=LTP PE=1 SV=1 - [NLTP1_ORYSJ]	1197.76	52.59	3	2	6	77	0.000257468	0.000166669	0.0480427	0.0591083	1.54479	0.627408
OsJ_36037	A3CH67	Uncharacterized protein OS=Oryza sativa subsp. japonica OX=39947 GN=OsJ_36037 PE=4 SV=1 - [A3CH67_ORYSJ]	0	1.76	1	1	1	1	0.000270891	0.000174403	0.0298043	0.0455088	1.55325	0.635286
Os04g0446500	A0A0P0WAZ7	Os04g0446500 protein (Fragment) OS=Oryza sativa subsp. japonica OX=39947 GN=Os04g0446500 PE=4 SV=1 - [A0A0P0WAZ7_ORYSJ]	59.12	17.31	1	1	4	6	0.00032184	0.000206768	0.000688704	0.00944299	1.55653	0.638332
OsJ_24387	B9FXF4	Uncharacterized protein OS=Oryza sativa subsp. japonica OX=39947 GN=OsJ_24387 PE=4 SV=1 - [B9FXF4_ORYSJ]	34.04	1.17	3	1	1	1	0.000205846	0.000130477	0.0274793	0.0436303	1.57765	0.657778
OsI_24498	B8B2J6	Uncharacterized protein OS=Oryza sativa subsp. indica OX=39946 GN=OsI_24498 PE=4 SV=1 - [B8B2J6_ORYSI]	32.72	3.54	3	1	1	1	0.000292645	0.00018537	0.0329726	0.047862	1.57871	0.658743
OsI_06841	A2X3Q3	Uncharacterized protein OS=Oryza sativa subsp. indica OX=39946 GN=OsI_06841 PE=4 SV=1 - [A2X3Q3_ORYSI]	93.35	3.24	2	1	2	6	0.000223671	0.000140836	0.00109003	0.0109973	1.58817	0.667362
OsI_02580	B8AAR8	Uncharacterized protein OS=Oryza sativa subsp. indica OX=39946 GN=OsI_02580 PE=4 SV=1 - [B8AAR8_ORYSI]	0	7.24	2	2	2	2	0.000288115	0.0001801	0.0189642	0.0366839	1.59975	0.677844
RSZ23	Q6K9C3	Serine/arginine-rich splicing factor RSZ23 OS=Oryza sativa subsp. japonica OX=39947 GN=RSZ23 PE=2 SV=1 - [RZP23_ORYSJ]	41.6734	28	3	2	7	13	0.000217261	0.000135412	0.000311395	0.00690059	1.60445	0.682078
Os02g0661000	Q6H697	Os02g0661000 protein OS=Oryza sativa subsp. japonica OX=39947 GN=Os02g0661000 PE=4 SV=1 - [Q6H697_ORYSJ]	36.6	8.94	2	1	1	1	0.000319281	0.000198673	0.0444141	0.0566771	1.60707	0.684432
Os01g0811300	Q8RUS3	Os01g0811300 protein OS=Oryza sativa subsp. japonica OX=39947 GN=Os01g0811300 PE=4 SV=1 - [Q8RUS3_ORYSJ]	67.6093	4.21	3	2	3	3	0.000291352	0.00018118	0.000910183	0.0103507	1.60808	0.685342
OsI_29641	A2YWD0	Uncharacterized protein OS=Oryza sativa subsp. indica OX=39946 GN=OsI_29641 PE=4 SV=1 - [A2YWD0_ORYSI]	77.56	17.1	1	5	5	8	0.000217317	0.00013508	0.0194476	0.0371247	1.6088	0.685984
OsI_11778	A2XHA1	Uncharacterized protein OS=Oryza sativa subsp. indica OX=39946 GN=OsI_11778 PE=4 SV=1 - [A2XHA1_ORYSI]	26.1179	4.78	1	2	2	2	0.000335844	0.000207736	0.0454888	0.0574158	1.61668	0.693035
Os09g0314400	Q0J2R1	Probable protein phosphatase 2C 67 OS=Oryza sativa subsp. japonica OX=39947 GN=Os09g0314400 PE=2 SV=1 - [P2C67_ORYSJ]	0	4.09	3	1	1	1	0.000329489	0.000203493	0.0262918	0.042732	1.61916	0.69525
OsJ_19463	B9FLH7	Uncharacterized protein OS=Oryza sativa subsp. japonica OX=39947 GN=OsJ_19463 PE=4 SV=1 - [B9FLH7_ORYSJ]	51.2031	6.49	4	4	4	4	0.000156539	9.66575e-05	0.00012311	0.00590981	1.61952	0.69557
OsI_35929	A2ZDR8	Non-specific lipid-transfer protein OS=Oryza sativa subsp. indica OX=39946 GN=OsI_35929 PE=3 SV=1 - [A2ZDR8_ORYSI]	689.899	44.44	1	1	4	41	0.000282896	0.000173002	0.0239364	0.04099	1.63521	0.709478
OsI_11785	A2XHA8	Uncharacterized protein OS=Oryza sativa subsp. indica OX=39946 GN=OsI_11785 PE=4 SV=1 - [A2XHA8_ORYSI]	71.48	7.17	2	1	2	10	0.000136498	8.27302e-05	3.5367e-05	0.00489225	1.64992	0.722393
Os04g0478000	Q0JCD4	Os04g0478000 protein OS=Oryza sativa subsp. japonica OX=39947 GN=Os04g0478000 PE=4 SV=2 - [Q0JCD4_ORYSJ]	33.91	8.51	6	1	1	1	0.000288093	0.000172621	0.00523709	0.0216209	1.66894	0.738931
Os01g0640132	C7IXN6	Carbonic anhydrase OS=Oryza sativa subsp. japonica OX=39947 GN=Os01g0640132 PE=3 SV=1 - [C7IXN6_ORYSJ]	0	4.92	1	2	2	2	0.000181128	0.000108471	5.14841e-05	0.00507584	1.66983	0.739699
OsI_08429	B8AGF0	Uncharacterized protein OS=Oryza sativa subsp. indica OX=39946 GN=OsI_08429 PE=3 SV=1 - [B8AGF0_ORYSI]	113.917	4.22	4	3	3	4	0.000266283	0.000159103	0.00466102	0.0206224	1.67365	0.743
OsI_29063	A2YUR3	Uncharacterized protein OS=Oryza sativa subsp. indica OX=39946 GN=OsI_29063 PE=4 SV=1 - [A2YUR3_ORYSI]	3388.33	75.4	1	1	23	179	0.00026863	0.000160242	0.0134617	0.0321646	1.6764	0.74537
Os06g0159725	A0A0P0WTA4	Os06g0159725 protein (Fragment) OS=Oryza sativa subsp. japonica OX=39947 GN=Os06g0159725 PE=3 SV=1 - [A0A0P0WTA4_ORYSJ]	115.26	16.67	19	1	3	10	0.000134612	8.01337e-05	0.000227617	0.00659441	1.67984	0.748321
ADI1	Q0J8M2	Ferredoxin-1, chloroplastic OS=Oryza sativa subsp. japonica OX=39947 GN=ADI1 PE=1 SV=1 - [FER1_ORYSJ]	1820.24	64.75	2	5	5	119	0.000283199	0.000167685	0.0102785	0.0288364	1.68888	0.756064
OsI_15510	B8ASR7	Uncharacterized protein OS=Oryza sativa subsp. indica OX=39946 GN=OsI_15510 PE=4 SV=1 - [B8ASR7_ORYSI]	36.88	5.06	2	1	1	2	0.000273659	0.00015927	0.0113284	0.0300199	1.7182	0.780902
Os03g0432900	Q0DQZ2	Os03g0432900 protein (Fragment) OS=Oryza sativa subsp. japonica OX=39947 GN=Os03g0432900 PE=4 SV=1 - [Q0DQZ2_ORYSJ]	45.69	3.56	5	1	1	1	0.000223481	0.000129264	0.00237777	0.0153391	1.72887	0.789832
OSIGBa0153E02-OSIGBa0093I20.17	Q01HQ8	OSIGBa0153E02-OSIGBa0093I20.17 protein OS=Oryza sativa OX=4530 GN=OSIGBa0153E02-OSIGBa0093I20.17 PE=4 SV=1 - [Q01HQ8_ORYSA]	26.69	8.02	1	2	2	2	0.000245614	0.000141622	0.00673014	0.0240238	1.73429	0.794349
LIR1	Q03200	Light-regulated protein, chloroplastic OS=Oryza sativa subsp. japonica OX=39947 GN=LIR1 PE=1 SV=1 - [LIRP1_ORYSJ]	116.673	35.16	1	2	2	4	0.00016799	9.64091e-05	0.00222884	0.0149633	1.74247	0.801131
OsJ_36559	B9GDU6	Uncharacterized protein OS=Oryza sativa subsp. japonica OX=39947 GN=OsJ_36559 PE=4 SV=1 - [B9GDU6_ORYSJ]	49.9826	13.68	4	3	3	8	0.000267678	0.000152024	0.0125517	0.0313036	1.76076	0.816198
OsI_31501	B8BFE4	Uncharacterized protein OS=Oryza sativa subsp. indica OX=39946 GN=OsI_31501 PE=4 SV=1 - [B8BFE4_ORYSI]	33.86	3.02	2	4	4	4	0.000223111	0.000126686	0.00318092	0.0173567	1.76113	0.816505
Os01g0791150	C7IXC8	Os01g0791150 protein OS=Oryza sativa subsp. japonica OX=39947 GN=Os01g0791150 PE=3 SV=1 - [C7IXC8_ORYSJ]	4030.99	61.01	1	1	14	317	0.000249319	0.000139651	0.00111422	0.0111036	1.7853	0.836166
Os03g0725100	A0A0P0W2D0	Os03g0725100 protein (Fragment) OS=Oryza sativa subsp. japonica OX=39947 GN=Os03g0725100 PE=4 SV=1 - [A0A0P0W2D0_ORYSJ]	31.15	14.33	5	4	4	4	0.000307828	0.000171794	0.000958988	0.0105105	1.79184	0.841442
OsJ_04066	B9EUE5	Uncharacterized protein OS=Oryza sativa subsp. japonica OX=39947 GN=OsJ_04066 PE=4 SV=1 - [B9EUE5_ORYSJ]	62.56	3.11	2	1	1	1	0.000261201	0.00014404	0.00322576	0.0174566	1.8134	0.858694
OsJ_10304	B9F7A0	Uncharacterized protein OS=Oryza sativa subsp. japonica OX=39947 GN=OsJ_10304 PE=4 SV=1 - [B9F7A0_ORYSJ]	35.31	9.41	2	1	1	1	0.000286009	0.000155629	0.0163154	0.0344507	1.83776	0.877949
OJ1135_F06.14	Q6ZHT8	Putative bZIP protein HY5 OS=Oryza sativa subsp. japonica OX=39947 GN=OJ1135_F06.14 PE=4 SV=1 - [Q6ZHT8_ORYSJ]	105.693	26.6	5	4	5	7	0.000230563	0.000123465	0.00193677	0.014208	1.86743	0.901053
OsI_01742	B8A7G7	Uncharacterized protein OS=Oryza sativa subsp. indica OX=39946 GN=OsI_01742 PE=4 SV=1 - [B8A7G7_ORYSI]	0	1.12	4	1	1	1	0.000335407	0.000178655	0.00806762	0.0259949	1.8774	0.908736
OsI_36331	A2ZEW5	Uncharacterized protein OS=Oryza sativa subsp. indica OX=39946 GN=OsI_36331 PE=4 SV=1 - [A2ZEW5_ORYSI]	222.403	35.64	2	5	5	27	0.000256917	0.000134322	0.000781941	0.00986698	1.91269	0.935606
CRSH1	Q6ATB4	Probable GTP diphosphokinase CRSH1, chloroplastic OS=Oryza sativa subsp. japonica OX=39947 GN=CRSH1 PE=2 SV=1 - [CRSH1_ORYSJ]	32.42	2.57	2	1	1	1	0.000213997	0.000110874	0.0243675	0.0413227	1.93009	0.948671
OsI_27196	B8B5J6	Uncharacterized protein OS=Oryza sativa subsp. indica OX=39946 GN=OsI_27196 PE=4 SV=1 - [B8B5J6_ORYSI]	0	0.52	2	1	1	1	0.000323447	0.000167469	0.00902362	0.0272376	1.93138	0.949634
OsJ_06854	A3A781	Uncharacterized protein OS=Oryza sativa subsp. japonica OX=39947 GN=OsJ_06854 PE=4 SV=1 - [A3A781_ORYSJ]	25.95	15.84	2	2	2	2	0.000297457	0.000146495	0.0438908	0.0563115	2.03049	1.02182
Os11g0244800	Q2R837	PHD finger protein ALFIN-LIKE 8 OS=Oryza sativa subsp. japonica OX=39947 GN=Os11g0244800 PE=2 SV=1 - [ALFL8_ORYSJ]	49.7237	9.84	2	2	3	5	0.000285192	0.000135633	0.0139181	0.0325698	2.10267	1.07222
rbcL	A0A088BVM4	Ribulose bisphosphate carboxylase large chain (Fragment) OS=Oryza sativa subsp. japonica OX=39947 GN=rbcL PE=3 SV=1 - [A0A088BVM4_ORYSJ]	18583.6	63.39	6	3	39	2089	0.000372702	0.000175731	0.00983054	0.0282923	2.12086	1.08465
rbcL	I7EGE7	Ribulose-1,5-bisphosphate carboxylase/oxygenase large subunit (Fragment) OS=Oryza sativa OX=4530 GN=rbcL PE=4 SV=1 - [I7EGE7_ORYSA]	3634.01	46.45	2	2	6	311	0.000385392	0.000179417	0.00829996	0.0263031	2.14802	1.10301
OsJ_06661	B9EZW2	Uncharacterized protein OS=Oryza sativa subsp. japonica OX=39947 GN=OsJ_06661 PE=4 SV=1 - [B9EZW2_ORYSJ]	46.72	12.36	3	2	2	2	0.000403952	0.000183781	0.0399964	0.0534846	2.19801	1.13619
HSP24.1	Q6Z7V2	24.1 kDa heat shock protein, mitochondrial OS=Oryza sativa subsp. japonica OX=39947 GN=HSP24.1 PE=2 SV=1 - [HS24M_ORYSJ]	48.1954	12.73	5	3	3	3	0.000140356	6.24732e-05	0.00102431	0.0107072	2.24667	1.16779
OsI_38307	B8BPL8	Uncharacterized protein OS=Oryza sativa subsp. indica OX=39946 GN=OsI_38307 PE=4 SV=1 - [B8BPL8_ORYSI]	34.36	25.3	2	1	1	1	0.000283537	0.000121373	0.011088	0.0297534	2.33608	1.22409
OsI_07008	B8AGM5	Uncharacterized protein OS=Oryza sativa subsp. indica OX=39946 GN=OsI_07008 PE=4 SV=1 - [B8AGM5_ORYSI]	48.2	5.04	3	1	1	1	0.000162485	6.77287e-05	0.0226839	0.0399855	2.39905	1.26246
OsI_29464	A2YVV8	Uncharacterized protein OS=Oryza sativa subsp. indica OX=39946 GN=OsI_29464 PE=4 SV=1 - [A2YVV8_ORYSI]	51.09	13.22	2	1	1	1	0.000116318	2.25393e-05	0.000962861	0.0105227	5.16069	2.36756
OsI_07318	A2X544	Uncharacterized protein OS=Oryza sativa subsp. indica OX=39946 GN=OsI_07318 PE=4 SV=1 - [A2X544_ORYSI]	0	3.68	2	1	1	1	1.281e-05	0.000193429	0.00749844	0.0251945	0.0662257	-3.91647
Os09g0484200	A0A0P0XNQ6	Os09g0484200 protein (Fragment) OS=Oryza sativa subsp. japonica OX=39947 GN=Os09g0484200 PE=4 SV=1 - [A0A0P0XNQ6_ORYSJ]	0	32.98	3	1	1	1	0.000174437	0.000725716	0.00204606	0.0145064	0.240365	-2.0567
OsI_09087	B8AJ54	Uncharacterized protein OS=Oryza sativa subsp. indica OX=39946 GN=OsI_09087 PE=4 SV=1 - [B8AJ54_ORYSI]	34.72	13.7	3	1	1	1	9.15325e-05	0.000278588	0.000227222	0.00659281	0.328559	-1.60578
Os02g0731600	Q0DXV3	Os02g0731600 protein (Fragment) OS=Oryza sativa subsp. japonica OX=39947 GN=Os02g0731600 PE=4 SV=1 - [Q0DXV3_ORYSJ]	123.802	36.11	4	4	4	12	0.000142961	0.000396447	0.0329415	0.047839	0.360605	-1.47151
OsI_03824	B8A9T5	Uncharacterized protein OS=Oryza sativa subsp. indica OX=39946 GN=OsI_03824 PE=4 SV=1 - [B8A9T5_ORYSI]	192.538	9.93	2	1	1	8	0.000113389	0.000300216	0.0140201	0.0326581	0.377693	-1.40471
Os12g0611700	Q0ILZ2	Os12g0611700 protein OS=Oryza sativa subsp. japonica OX=39947 GN=Os12g0611700 PE=4 SV=1 - [Q0ILZ2_ORYSJ]	50.75	29.69	5	1	1	1	0.000104702	0.000270887	1.42127e-06	0.00177498	0.386517	-1.37139
OSJNBb0079K11.29	Q69K85	Uncharacterized protein OSJNBb0079K11.29 OS=Oryza sativa subsp. japonica OX=39947 GN=OSJNBb0079K11.29 PE=4 SV=1 - [Q69K85_ORYSJ]	0	4.47	1	1	1	1	0.000270662	0.000636554	8.89716e-05	0.00565362	0.425199	-1.23379
OsI_11006	A2XF65	Uncharacterized protein OS=Oryza sativa subsp. indica OX=39946 GN=OsI_11006 PE=3 SV=1 - [A2XF65_ORYSI]	1117.16	42.65	3	12	12	79	9.06328e-05	0.000212913	0.00433466	0.0199905	0.425679	-1.23216
OsI_29321	A2YVG4	Uncharacterized protein OS=Oryza sativa subsp. indica OX=39946 GN=OsI_29321 PE=4 SV=1 - [A2YVG4_ORYSI]	60.3	11.32	2	1	1	2	0.00012759	0.000287374	0.00651692	0.0236953	0.443985	-1.17142
OsJ_19615	B9FLQ1	Uncharacterized protein OS=Oryza sativa subsp. japonica OX=39947 GN=OsJ_19615 PE=4 SV=1 - [B9FLQ1_ORYSJ]	28.66	9.48	3	1	1	3	0.000124699	0.000264454	0.000214624	0.00653907	0.471535	-1.08456
OsI_15832	A2XT95	Uncharacterized protein OS=Oryza sativa subsp. indica OX=39946 GN=OsI_15832 PE=4 SV=1 - [A2XT95_ORYSI]	33.84	4.93	2	1	1	6	0.000187949	0.000391507	0.0409634	0.054199	0.480064	-1.0587
OJ1111_B11.19	Q94GE1	Putative zinc finger protein OS=Oryza sativa subsp. japonica OX=39947 GN=OJ1111_B11.19 PE=4 SV=1 - [Q94GE1_ORYSJ]	0	22.86	2	1	1	1	0.00015855	0.000324657	0.000184561	0.00638614	0.48836	-1.03398
Os06g0530200	Q5Z6B8	Os06g0530200 protein OS=Oryza sativa subsp. japonica OX=39947 GN=Os06g0530200 PE=2 SV=1 - [Q5Z6B8_ORYSJ]	18.36	11.58	1	1	1	3	0.000201677	0.000406758	0.000677845	0.00939432	0.495815	-1.01213
OsI_03631	B8A916	Uncharacterized protein OS=Oryza sativa subsp. indica OX=39946 GN=OsI_03631 PE=4 SV=1 - [B8A916_ORYSI]	60.6526	42.86	1	3	3	4	0.000162205	0.000326307	0.0103169	0.0288818	0.497094	-1.00841
psbH	P0C422	Photosystem II reaction center protein H OS=Oryza sativa subsp. japonica OX=39947 GN=psbH PE=3 SV=1 - [PSBH_ORYSJ]	157.5	38.36	2	4	4	52	0.000133437	0.000265422	0.000814802	0.0100007	0.502737	-0.992124
Os10g0531400	Q8L4V6	Glutathione S-transferase GSTU6, putative, expressed OS=Oryza sativa subsp. japonica OX=39947 GN=Os10g0531400 PE=2 SV=1 - [Q8L4V6_ORYSJ]	176.517	20	3	3	4	11	0.000150634	0.000296383	4.95599e-05	0.00505966	0.508243	-0.976411
OsJ_04684	B9EW29	Uncharacterized protein OS=Oryza sativa subsp. japonica OX=39947 GN=OsJ_04684 PE=4 SV=1 - [B9EW29_ORYSJ]	0	11.37	2	2	2	2	0.000150095	0.000292645	0.000248606	0.00667318	0.512892	-0.963273
Os09g0375100	A0A0P0XLD9	Os09g0375100 protein (Fragment) OS=Oryza sativa subsp. japonica OX=39947 GN=Os09g0375100 PE=4 SV=1 - [A0A0P0XLD9_ORYSJ]	33.22	25	3	2	2	3	0.000147704	0.000286303	0.0256736	0.0422922	0.515899	-0.95484
CAM3	A2WNH1	Calmodulin-3 OS=Oryza sativa subsp. indica OX=39946 GN=CAM3 PE=3 SV=2 - [CALM3_ORYSI]	287.016	52.35	4	2	9	22	0.000113578	0.000214985	0.000634508	0.00918914	0.528306	-0.920555
OsI_08486	A2X8C8	Uncharacterized protein OS=Oryza sativa subsp. indica OX=39946 GN=OsI_08486 PE=3 SV=1 - [A2X8C8_ORYSI]	85.0356	59.52	3	3	3	5	0.000146332	0.000276466	0.000842047	0.0101062	0.529294	-0.91786
OsI_22504	B8B0J7	Uncharacterized protein OS=Oryza sativa subsp. indica OX=39946 GN=OsI_22504 PE=4 SV=1 - [B8B0J7_ORYSI]	97.6562	36.36	2	3	3	3	0.000134572	0.000251812	0.00022631	0.00658909	0.534416	-0.903965
Os05g0400400	Q0DIC9	Os05g0400400 protein OS=Oryza sativa subsp. japonica OX=39947 GN=Os05g0400400 PE=2 SV=1 - [Q0DIC9_ORYSJ]	46.19	62.9	2	5	5	11	0.000179535	0.000325273	0.0266397	0.0429743	0.551954	-0.857381
OsI_19050	B8AZN5	Uncharacterized protein OS=Oryza sativa subsp. indica OX=39946 GN=OsI_19050 PE=4 SV=1 - [B8AZN5_ORYSI]	113.103	24.53	3	3	3	6	0.000126081	0.000226599	0.00142416	0.0124779	0.556405	-0.845793
Os04g0137500	Q0JF69	Os04g0137500 protein (Fragment) OS=Oryza sativa subsp. japonica OX=39947 GN=Os04g0137500 PE=4 SV=2 - [Q0JF69_ORYSJ]	46.94	34.31	2	3	3	3	0.000139172	0.000248707	0.000443171	0.0080239	0.559583	-0.837576
OsI_18717	A2Y129	Uncharacterized protein OS=Oryza sativa subsp. indica OX=39946 GN=OsI_18717 PE=4 SV=1 - [A2Y129_ORYSI]	71.3214	21.43	2	3	3	3	0.000125581	0.000218779	3.12278e-05	0.00481846	0.574006	-0.800862
OsI_01816	A2WPN6	Uncharacterized protein OS=Oryza sativa subsp. indica OX=39946 GN=OsI_01816 PE=3 SV=1 - [A2WPN6_ORYSI]	163.123	26.32	6	5	5	16	0.000144553	0.000251817	0.00105133	0.0108216	0.574041	-0.800775
LOC_Os11g31900	Q2R3H7	Acyl carrier protein OS=Oryza sativa subsp. japonica OX=39947 GN=LOC_Os11g31900 PE=3 SV=2 - [Q2R3H7_ORYSJ]	97.19	20.54	4	2	2	8	0.000218661	0.000379141	0.0314128	0.0467262	0.576726	-0.794043
LOC_Os10g38360	Q945W6	Glutathione S-transferase, N-terminal domain containing protein, expressed OS=Oryza sativa subsp. japonica OX=39947 GN=LOC_Os10g38360 PE=2 SV=1 - [Q945W6_ORYSJ]	31.81	15.88	4	3	3	3	0.000224505	0.000388252	0.00191427	0.0141439	0.578246	-0.790245
SODCC2	P28757	Superoxide dismutase [Cu-Zn] 2 OS=Oryza sativa subsp. japonica OX=39947 GN=SODCC2 PE=1 SV=2 - [SODC2_ORYSJ]	288.17	39.47	5	2	6	18	0.000293241	0.000497587	0.000554929	0.00876	0.589326	-0.762861
ACBP2	Q5VRM0	Acyl-CoA-binding domain-containing protein 2 OS=Oryza sativa subsp. japonica OX=39947 GN=ACBP2 PE=1 SV=1 - [ACBP2_ORYSJ]	174.919	71.43	1	5	6	18	0.000105543	0.000179004	0.00615862	0.0231148	0.589614	-0.762157
OsI_20562	B8AZS6	Thioredoxin OS=Oryza sativa subsp. indica OX=39946 GN=OsI_20562 PE=3 SV=1 - [B8AZS6_ORYSI]	88.3279	36.36	2	3	4	9	0.000147291	0.000247961	0.000634855	0.00919086	0.594012	-0.751437
OsI_13228	A2XL83	Uncharacterized protein OS=Oryza sativa subsp. indica OX=39946 GN=OsI_13228 PE=4 SV=1 - [A2XL83_ORYSI]	29.86	9.3	1	1	1	1	0.000301622	0.000506531	0.000154292	0.00618358	0.595466	-0.74791
OSJNBb0034B12.21	Q69MT6	Uncharacterized protein OSJNBb0034B12.21 OS=Oryza sativa subsp. japonica OX=39947 GN=OSJNBb0034B12.21 PE=4 SV=1 - [Q69MT6_ORYSJ]	88.23	20.75	2	2	2	4	0.000194952	0.000325966	6.59458e-05	0.00536099	0.598076	-0.7416
OsI_32860	A2Z5D5	Uncharacterized protein OS=Oryza sativa subsp. indica OX=39946 GN=OsI_32860 PE=3 SV=1 - [A2Z5D5_ORYSI]	116.448	33.9	2	1	6	11	0.000271187	0.000452546	0.000211434	0.0065246	0.599248	-0.738774
OsI_14471	A2XPF9	Uncharacterized protein OS=Oryza sativa subsp. indica OX=39946 GN=OsI_14471 PE=4 SV=1 - [A2XPF9_ORYSI]	104.168	26.11	2	6	6	8	0.000225123	0.000375588	0.00675278	0.024058	0.599388	-0.738437
OsI_37230	A2ZHF9	Chalcone-flavonone isomerase family protein OS=Oryza sativa subsp. indica OX=39946 GN=OsI_37230 PE=3 SV=1 - [A2ZHF9_ORYSI]	208.749	41.83	3	1	8	13	0.000198284	0.000327011	0.00151764	0.0128418	0.606352	-0.721773
OsI_07209	A2X4T7	40S ribosomal protein S27 OS=Oryza sativa subsp. indica OX=39946 GN=OsI_07209 PE=3 SV=1 - [A2X4T7_ORYSI]	163.952	44.19	7	3	3	11	0.000162186	0.000267268	0.000806794	0.00996883	0.60683	-0.720636
LOC_Os03g10500	Q10QB8	Adenosine-5'-phosphosulfate kinase, putative OS=Oryza sativa subsp. japonica OX=39947 GN=LOC_Os03g10500 PE=4 SV=1 - [Q10QB8_ORYSJ]	46.17	11.48	3	1	1	1	0.000148986	0.000245211	0.0244281	0.0413689	0.607581	-0.718852
OsI_18157	A2XZJ9	Uncharacterized protein OS=Oryza sativa subsp. indica OX=39946 GN=OsI_18157 PE=4 SV=1 - [A2XZJ9_ORYSI]	48.89	10.94	3	2	2	4	0.000175668	0.000289087	0.00486391	0.02099	0.607664	-0.718655
OsI_34226	A2Z936	Uncharacterized protein OS=Oryza sativa subsp. indica OX=39946 GN=OsI_34226 PE=4 SV=1 - [A2Z936_ORYSI]	0	1.89	2	1	1	1	0.000369157	0.000607192	0.00412146	0.0195479	0.607973	-0.717921
OsI_12015	A2XHW8	Uncharacterized protein OS=Oryza sativa subsp. indica OX=39946 GN=OsI_12015 PE=4 SV=1 - [A2XHW8_ORYSI]	483.077	29.75	3	4	4	28	0.000171195	0.000281412	0.00158636	0.0130938	0.608343	-0.717043
OsI_29348	A2YVI8	Chlorophyll a-b binding protein, chloroplastic OS=Oryza sativa subsp. indica OX=39946 GN=OsI_29348 PE=3 SV=1 - [A2YVI8_ORYSI]	609.119	51.64	6	7	7	60	0.000170825	0.000277021	0.000124914	0.0059199	0.616649	-0.697479
CAM2	Q6F332	Calmodulin-2 OS=Oryza sativa subsp. japonica OX=39947 GN=CAM2 PE=2 SV=3 - [CALM2_ORYSJ]	526.09	52.35	5	2	9	43	0.000133256	0.000215593	0.00023697	0.006631	0.618091	-0.69411
OsI_14124	B8AMT0	Uncharacterized protein OS=Oryza sativa subsp. indica OX=39946 GN=OsI_14124 PE=4 SV=1 - [B8AMT0_ORYSI]	57.6742	23.72	4	1	5	7	0.000117586	0.000187916	0.011778	0.0305099	0.625735	-0.676376
CHMP1	Q84VG1	ESCRT-related protein CHMP1 OS=Oryza sativa subsp. japonica OX=39947 GN=CHMP1 PE=2 SV=1 - [CHMP1_ORYSJ]	34.71	9.76	1	3	3	5	0.000186575	0.000296063	0.000123119	0.00590986	0.630187	-0.666147
OsI_05681	B8AGZ5	Uncharacterized protein OS=Oryza sativa subsp. indica OX=39946 GN=OsI_05681 PE=4 SV=1 - [B8AGZ5_ORYSI]	45.4019	36.36	3	3	3	6	0.00015093	0.000237317	0.000433535	0.00795545	0.635985	-0.652936
OsI_12483	B8ALP5	Uncharacterized protein OS=Oryza sativa subsp. indica OX=39946 GN=OsI_12483 PE=4 SV=1 - [B8ALP5_ORYSI]	78.3067	11.86	1	1	1	3	0.000154323	0.000241546	0.00143503	0.0125215	0.638899	-0.64634
TIP1-2	Q94CS9	Probable aquaporin TIP1-2 OS=Oryza sativa subsp. japonica OX=39947 GN=TIP1-2 PE=2 SV=1 - [TIP12_ORYSJ]	52.165	6.35	1	1	1	4	0.000170242	0.000265531	0.00248792	0.0156	0.641139	-0.641292
SODCC1	A2XGP6	Superoxide dismutase [Cu-Zn] 1 OS=Oryza sativa subsp. indica OX=39946 GN=SODCC1 PE=2 SV=2 - [SODC1_ORYSI]	402.453	63.16	3	3	7	28	0.000254878	0.000397296	0.00699061	0.0244327	0.641532	-0.640407
OsJ_02893	A2ZW76	Uncharacterized protein OS=Oryza sativa subsp. japonica OX=39947 GN=OsJ_02893 PE=3 SV=1 - [A2ZW76_ORYSJ]	32.59	7.37	2	2	2	3	0.00028211	0.000439591	0.0288604	0.0447638	0.641756	-0.639903
OsI_24464	A2YGZ9	Uncharacterized protein OS=Oryza sativa subsp. indica OX=39946 GN=OsI_24464 PE=4 SV=1 - [A2YGZ9_ORYSI]	154.683	10.12	2	1	1	3	0.00019891	0.000307761	0.00370066	0.0185962	0.646315	-0.62969
LOC_Os12g42850	Q2QLY9	Amino acid permease family protein, putative, expressed OS=Oryza sativa subsp. japonica OX=39947 GN=LOC_Os12g42850 PE=4 SV=1 - [Q2QLY9_ORYSJ]	43.97	1.78	4	1	1	1	0.000234706	0.000362399	0.00320205	0.017404	0.647645	-0.626725
MST3	Q7EZD7	Sugar transport protein MST3 OS=Oryza sativa subsp. japonica OX=39947 GN=MST3 PE=2 SV=1 - [MST3_ORYSJ]	97.5347	7.53	1	2	3	5	0.000145959	0.000224275	8.23394e-05	0.00558331	0.650806	-0.6197
xd23	Q710P3	Putative ribosomal protein L32 OS=Oryza sativa OX=4530 GN=xd23 PE=2 SV=1 - [Q710P3_ORYSA]	39.53	46.3	4	2	2	3	0.000191732	0.000294294	0.00457495	0.0204608	0.651497	-0.618169
OsI_35603	B8BJS5	Uncharacterized protein OS=Oryza sativa subsp. indica OX=39946 GN=OsI_35603 PE=4 SV=1 - [B8BJS5_ORYSI]	34.06	30.86	1	1	1	1	0.000202292	0.000307834	0.018377	0.0361325	0.657145	-0.605716
OSJNBa0060A14.13	Q7XEU6	Complex 1 family protein, putative, expressed OS=Oryza sativa subsp. japonica OX=39947 GN=OSJNBa0060A14.13 PE=2 SV=1 - [Q7XEU6_ORYSJ]	115.938	38.89	5	3	3	10	0.000135152	0.000204901	0.00671004	0.0239933	0.659597	-0.600344
P0497A05.16	Q8L416	Os01g0908400 protein OS=Oryza sativa subsp. japonica OX=39947 GN=P0497A05.16 PE=2 SV=1 - [Q8L416_ORYSJ]	59.1216	36.07	1	2	2	4	0.000135489	0.000204034	0.000409494	0.00777635	0.664051	-0.590634
OsI_09336	A2XAQ4	Uncharacterized protein OS=Oryza sativa subsp. indica OX=39946 GN=OsI_09336 PE=4 SV=1 - [A2XAQ4_ORYSI]	119.818	28.69	1	4	4	7	0.000171835	0.000258765	0.0461968	0.0578937	0.664058	-0.590618
OsI_16622	B8ARR4	Uncharacterized protein OS=Oryza sativa subsp. indica OX=39946 GN=OsI_16622 PE=4 SV=1 - [B8ARR4_ORYSI]	146.578	43.11	2	5	5	18	0.000138968	0.00020867	0.00226952	0.0150676	0.66597	-0.586471
OsI_00645	A2WLD6	Uncharacterized protein OS=Oryza sativa subsp. indica OX=39946 GN=OsI_00645 PE=4 SV=1 - [A2WLD6_ORYSI]	132.58	36.95	4	2	8	20	0.000167902	0.000251912	0.0017135	0.0135289	0.666508	-0.585305
OsI_30039	A2YXH6	Uncharacterized protein OS=Oryza sativa subsp. indica OX=39946 GN=OsI_30039 PE=3 SV=1 - [A2YXH6_ORYSI]	32.18	43.84	1	3	3	3	0.000201295	0.000301924	0.0381202	0.0520639	0.666706	-0.584877
OsI_20107	A2Y534	Uncharacterized protein OS=Oryza sativa subsp. indica OX=39946 GN=OsI_20107 PE=3 SV=1 - [A2Y534_ORYSI]	173.765	28.72	1	4	10	27	0.000181059	0.000270739	0.00113106	0.0111761	0.668759	-0.580442
OsI_09423	A2XAZ1	Uncharacterized protein OS=Oryza sativa subsp. indica OX=39946 GN=OsI_09423 PE=4 SV=1 - [A2XAZ1_ORYSI]	211.912	17.61	3	2	2	8	0.000185539	0.000275935	0.0146627	0.0331962	0.672404	-0.572601
OsI_30330	B8B9N0	Uncharacterized protein OS=Oryza sativa subsp. indica OX=39946 GN=OsI_30330 PE=4 SV=1 - [B8B9N0_ORYSI]	47.26	2.45	2	1	1	1	0.000161605	0.000240209	4.61604e-05	0.00502808	0.672768	-0.571819
OsI_17234	A2XX36	Uncharacterized protein OS=Oryza sativa subsp. indica OX=39946 GN=OsI_17234 PE=4 SV=1 - [A2XX36_ORYSI]	0	20.17	2	1	1	1	0.000206333	0.000305359	0.000343087	0.00720978	0.675706	-0.565532
P0524E08.111	Q7XI43	Metal-transporting P-type ATPase-like protein OS=Oryza sativa subsp. japonica OX=39947 GN=P0524E08.111 PE=2 SV=1 - [Q7XI43_ORYSJ]	71.6048	20.37	3	3	3	5	0.000204564	0.000300801	5.51607e-05	0.00515924	0.680063	-0.556259
Os12g0628600	P31110	Thaumatin-like protein OS=Oryza sativa subsp. japonica OX=39947 GN=Os12g0628600 PE=1 SV=1 - [TLP_ORYSJ]	84.0314	33.33	7	3	3	9	0.000279664	0.000410059	0.012615	0.0313659	0.68201	-0.552135
OsI_15093	A2XR23	Uncharacterized protein OS=Oryza sativa subsp. indica OX=39946 GN=OsI_15093 PE=4 SV=1 - [A2XR23_ORYSI]	47.7481	17.03	4	3	3	4	0.000123947	0.000181122	0.000491714	0.00835981	0.68433	-0.547236
OsJ_19692	B9FLT3	Uncharacterized protein OS=Oryza sativa subsp. japonica OX=39947 GN=OsJ_19692 PE=4 SV=1 - [B9FLT3_ORYSJ]	199.82	25.35	7	3	14	24	0.00019963	0.000290997	0.00109437	0.0110166	0.68602	-0.543678
OJ1316_A04.115	Q7XIQ1	Os07g0647500 protein OS=Oryza sativa subsp. japonica OX=39947 GN=OJ1316_A04.115 PE=2 SV=1 - [Q7XIQ1_ORYSJ]	93.8767	43.28	5	3	3	8	0.000166541	0.000242532	0.0386925	0.0525036	0.686677	-0.542296
Os02g0238500	Q6EQI9	Phospholipid scramblase OS=Oryza sativa subsp. japonica OX=39947 GN=Os02g0238500 PE=3 SV=1 - [Q6EQI9_ORYSJ]	0	8.04	7	1	1	1	0.000124902	0.000181715	0.00220339	0.0149026	0.68735	-0.540884
TIC62	Q10A77	Protein TIC 62, chloroplastic OS=Oryza sativa subsp. japonica OX=39947 GN=TIC62 PE=1 SV=1 - [TIC62_ORYSJ]	300.126	36.62	2	14	14	33	0.000243998	0.00035465	0.000386135	0.00758993	0.687997	-0.539525
OsI_38721	A2ZLM3	Uncharacterized protein OS=Oryza sativa subsp. indica OX=39946 GN=OsI_38721 PE=3 SV=1 - [A2ZLM3_ORYSI]	165.854	35.75	7	2	6	14	0.000152398	0.00022148	0.000125873	0.00592516	0.688091	-0.539328
P0458E05.28	Q5JJV4	YGGT family protein-like OS=Oryza sativa subsp. japonica OX=39947 GN=P0458E05.28 PE=4 SV=1 - [Q5JJV4_ORYSJ]	62.5166	9.74	2	1	1	4	0.000171874	0.000249095	0.0260355	0.0425511	0.689993	-0.535346
Os12g0555200	Q2QNT0	Os12g0555200 protein OS=Oryza sativa subsp. japonica OX=39947 GN=Os12g0555200 PE=2 SV=1 - [Q2QNT0_ORYSJ]	84.6346	25.32	6	4	4	4	0.000212329	0.000307143	0.0022872	0.015113	0.691304	-0.532607
TIP1-1	P50156	Probable aquaporin TIP1-1 OS=Oryza sativa subsp. japonica OX=39947 GN=TIP1-1 PE=2 SV=1 - [TIP11_ORYSJ]	59.793	6.8	1	1	1	3	0.000216025	0.00031219	0.0256173	0.0422515	0.691967	-0.531225
OsI_20451	A2Y628	Cysteine proteinase inhibitor OS=Oryza sativa subsp. indica OX=39946 GN=OsI_20451 PE=3 SV=1 - [A2Y628_ORYSI]	53.67	22.22	3	2	2	2	0.000196468	0.000283017	0.000683719	0.00942078	0.694192	-0.526594
P0708D12.1	Q6L4R1	PRA1 family protein OS=Oryza sativa subsp. japonica OX=39947 GN=P0708D12.1 PE=3 SV=1 - [Q6L4R1_ORYSJ]	0	3.63	2	1	1	1	0.00013864	0.000199651	8.12821e-05	0.00557122	0.694408	-0.526145
Os08g0109900	A0A0P0XB85	Os08g0109900 protein (Fragment) OS=Oryza sativa subsp. japonica OX=39947 GN=Os08g0109900 PE=4 SV=1 - [A0A0P0XB85_ORYSJ]	35.97	3.98	3	1	1	1	0.000180946	0.000260376	0.000433281	0.00795362	0.694943	-0.525033
OsI_18738	B8AYV7	Uncharacterized protein OS=Oryza sativa subsp. indica OX=39946 GN=OsI_18738 PE=4 SV=1 - [B8AYV7_ORYSI]	48.65	23.02	2	3	3	7	0.000212129	0.000304996	0.000740665	0.00968792	0.695515	-0.523846
OsI_18189	B8AXA2	Histone H2A OS=Oryza sativa subsp. indica OX=39946 GN=OsI_18189 PE=3 SV=1 - [B8AXA2_ORYSI]	48.647	36.49	7	1	5	22	0.000216808	0.000310293	3.29677e-05	0.00485146	0.69872	-0.517213
OsI_38129	A2ZJY0	Uncharacterized protein OS=Oryza sativa subsp. indica OX=39946 GN=OsI_38129 PE=4 SV=1 - [A2ZJY0_ORYSI]	125.931	25.88	3	4	4	16	0.000177759	0.000254258	0.00267286	0.0160992	0.699129	-0.51637
Os02g0764500	Q6Z7Q1	Chlorophyll a-b binding protein, chloroplastic OS=Oryza sativa subsp. japonica OX=39947 GN=Os02g0764500 PE=2 SV=1 - [Q6Z7Q1_ORYSJ]	178.853	20.31	3	4	4	11	0.000163654	0.000233694	0.000499276	0.0084109	0.700291	-0.513973
Os02g0750100	Q6Z8K7	Os02g0750100 protein OS=Oryza sativa subsp. japonica OX=39947 GN=Os02g0750100 PE=3 SV=1 - [Q6Z8K7_ORYSJ]	1142.51	56.38	4	10	10	123	0.000155623	0.000222102	0.00545992	0.0219722	0.70068	-0.513172
OsI_33538	A2Z764	Uncharacterized protein OS=Oryza sativa subsp. indica OX=39946 GN=OsI_33538 PE=3 SV=1 - [A2Z764_ORYSI]	121.888	68.09	2	6	10	20	0.000161967	0.000231057	0.000549369	0.00872712	0.700984	-0.512546
Os08g0157500	A0A0P0XC87	Os08g0157500 protein (Fragment) OS=Oryza sativa subsp. japonica OX=39947 GN=Os08g0157500 PE=3 SV=1 - [A0A0P0XC87_ORYSJ]	99.0004	36.28	4	9	9	12	0.000250057	0.00035617	0.00334572	0.017716	0.702073	-0.510307
OsI_34021	A2Z8I6	Uncharacterized protein OS=Oryza sativa subsp. indica OX=39946 GN=OsI_34021 PE=3 SV=1 - [A2Z8I6_ORYSI]	23.44	4.72	1	1	1	1	0.000194472	0.000276553	0.0337783	0.0485316	0.703199	-0.507994
LOC_Os03g16950	Q10N98	33 kDa secretory protein, putative, expressed OS=Oryza sativa subsp. japonica OX=39947 GN=LOC_Os03g16950 PE=2 SV=1 - [Q10N98_ORYSJ]	52.4364	16.98	1	1	2	2	0.000143539	0.000203321	0.0342983	0.0489738	0.705974	-0.502314
OsI_02598	A2WRV9	Uncharacterized protein OS=Oryza sativa subsp. indica OX=39946 GN=OsI_02598 PE=4 SV=1 - [A2WRV9_ORYSI]	0	4.28	1	2	2	3	0.000154803	0.000219012	0.0151174	0.033559	0.706826	-0.500573
OsI_23900	A2YFL7	50S ribosomal protein L35 OS=Oryza sativa subsp. indica OX=39946 GN=OsI_23900 PE=3 SV=1 - [A2YFL7_ORYSI]	0	9.59	1	1	1	2	0.000187846	0.00026528	0.0123024	0.0310544	0.708105	-0.497965
OsJ_36231	B9GDC3	Uncharacterized protein OS=Oryza sativa subsp. japonica OX=39947 GN=OsJ_36231 PE=4 SV=1 - [B9GDC3_ORYSJ]	70.0933	35.9	3	3	3	5	0.000251152	0.000354294	0.000593694	0.00897829	0.708879	-0.496388
OsI_06200	A2X1X4	Uncharacterized protein OS=Oryza sativa subsp. indica OX=39946 GN=OsI_06200 PE=4 SV=1 - [A2X1X4_ORYSI]	2070.54	66.67	4	12	13	115	0.000179196	0.000251912	0.00514408	0.0214688	0.711343	-0.491382
RSOsPR10	Q75T45	Os12g0555000 protein OS=Oryza sativa subsp. japonica OX=39947 GN=RSOsPR10 PE=2 SV=1 - [Q75T45_ORYSJ]	73.8584	43.13	2	7	7	10	0.000207594	0.000291744	0.0137415	0.032415	0.711563	-0.490938
Os02g0506500	Q6K6K7	Ubiquitin-like modifier-activating enzyme 5 OS=Oryza sativa subsp. japonica OX=39947 GN=Os02g0506500 PE=2 SV=1 - [UBA5_ORYSJ]	0	7.13	1	3	3	3	0.000186452	0.000261633	0.000610031	0.00906489	0.712648	-0.488739
ROMT-15	Q9XGP7	Tricin synthase 1 OS=Oryza sativa subsp. japonica OX=39947 GN=ROMT-15 PE=1 SV=1 - [OMT15_ORYSJ]	0	4.37	1	1	1	1	0.00023589	0.000330863	0.00568359	0.0223254	0.712952	-0.488123
OsI_28878	B8B9V9	Uncharacterized protein OS=Oryza sativa subsp. indica OX=39946 GN=OsI_28878 PE=4 SV=1 - [B8B9V9_ORYSI]	229.818	33.09	2	1	22	33	0.000202381	0.000283241	0.0450788	0.0571359	0.714519	-0.484956
OsI_34590	A2ZA25	Uncharacterized protein OS=Oryza sativa subsp. indica OX=39946 GN=OsI_34590 PE=4 SV=1 - [A2ZA25_ORYSI]	0	5.15	1	1	1	2	0.000201562	0.00028084	0.0123847	0.0311373	0.71771	-0.478527
OsI_04561	A2WXB5	Uncharacterized protein OS=Oryza sativa subsp. indica OX=39946 GN=OsI_04561 PE=4 SV=1 - [A2WXB5_ORYSI]	45.871	26.92	1	2	2	2	0.000158644	0.000220684	0.0175138	0.035414	0.718876	-0.476185
Os04g0674700	Q7XQ93	OSJNBa0018M05.15 protein OS=Oryza sativa subsp. japonica OX=39947 GN=Os04g0674700 PE=2 SV=2 - [Q7XQ93_ORYSJ]	47.42	3.76	1	2	2	2	0.000201673	0.000280534	0.0312396	0.0465982	0.718889	-0.476158
PPT1	Q69VR7	Phosphoenolpyruvate/phosphate translocator 1, chloroplastic OS=Oryza sativa subsp. japonica OX=39947 GN=PPT1 PE=2 SV=1 - [PPT1_ORYSJ]	134.134	3.43	1	1	1	3	0.000161124	0.000223802	0.0212099	0.038725	0.71994	-0.474052
OsI_30399	B8BCY3	Uncharacterized protein OS=Oryza sativa subsp. indica OX=39946 GN=OsI_30399 PE=4 SV=1 - [B8BCY3_ORYSI]	120.576	15.86	1	3	3	7	0.000174666	0.000242277	0.000264343	0.00672503	0.720937	-0.472056
OsI_06397	A2X2I0	CASP-like protein 2D1 OS=Oryza sativa subsp. indica OX=39946 GN=OsI_06397 PE=2 SV=1 - [CSPL9_ORYSI]	76.9065	19.9	2	3	3	4	0.000183997	0.000255166	0.000197355	0.00645601	0.721085	-0.471758
Os06g0219600	Q67X81	Os06g0219600 protein OS=Oryza sativa subsp. japonica OX=39947 GN=Os06g0219600 PE=2 SV=1 - [Q67X81_ORYSJ]	54.7949	41.18	2	4	7	10	0.000170114	0.000235345	0.000575139	0.00887614	0.722826	-0.468279
OsI_01178	A2WMV7	Uncharacterized protein OS=Oryza sativa subsp. indica OX=39946 GN=OsI_01178 PE=3 SV=1 - [A2WMV7_ORYSI]	21.03	6.35	2	1	1	1	0.000161428	0.000223152	0.0316582	0.0469065	0.723401	-0.467133
OsI_26816	A2YNK3	Uncharacterized protein OS=Oryza sativa subsp. indica OX=39946 GN=OsI_26816 PE=4 SV=1 - [A2YNK3_ORYSI]	33.08	13.88	1	2	2	2	0.000186642	0.000257516	0.00344293	0.0179553	0.724779	-0.464387
OsI_19808	B8AXU3	Uncharacterized protein OS=Oryza sativa subsp. indica OX=39946 GN=OsI_19808 PE=3 SV=1 - [B8AXU3_ORYSI]	29.86	2.32	3	1	1	1	0.000157525	0.000217074	0.0178719	0.0356867	0.725675	-0.462604
OsI_31133	B8BEY3	Mitochondrial pyruvate carrier OS=Oryza sativa subsp. indica OX=39946 GN=OsI_31133 PE=3 SV=1 - [B8BEY3_ORYSI]	55.9267	23.36	2	3	3	5	0.000161462	0.000222084	0.00236351	0.0153042	0.727029	-0.459916
Os01g0840700	Q8L5X0	60S ribosomal protein L36 OS=Oryza sativa subsp. japonica OX=39947 GN=Os01g0840700 PE=3 SV=1 - [Q8L5X0_ORYSJ]	41.1967	26.36	4	1	5	7	0.000172366	0.0002367	0.00214955	0.0147712	0.728204	-0.457585
OsI_29327	A2YVH0	Uncharacterized protein OS=Oryza sativa subsp. indica OX=39946 GN=OsI_29327 PE=4 SV=1 - [A2YVH0_ORYSI]	58.2912	42.16	4	3	3	3	0.00014935	0.000204749	0.00537412	0.0218391	0.729429	-0.45516
Os01g0934350	A0A0P0VCP0	Os01g0934350 protein (Fragment) OS=Oryza sativa subsp. japonica OX=39947 GN=Os01g0934350 PE=4 SV=1 - [A0A0P0VCP0_ORYSJ]	24.38	6.59	3	1	1	1	0.000199334	0.000272951	0.00076168	0.00978069	0.730293	-0.453453
rau1	Q8S490	Transcription factor RAU1 (Fragment) OS=Oryza sativa OX=4530 GN=rau1 PE=2 SV=1 - [Q8S490_ORYSA]	38.12	10.67	6	1	1	1	0.000176468	0.000241332	0.0153589	0.0337461	0.731225	-0.451613
OsI_01556	A2WNX6	Uncharacterized protein OS=Oryza sativa subsp. indica OX=39946 GN=OsI_01556 PE=4 SV=1 - [A2WNX6_ORYSI]	1616.97	61.29	2	9	10	60	0.000152357	0.000208316	0.00403291	0.0193566	0.731372	-0.451323
OsI_03747	B8A9G1	Uncharacterized protein OS=Oryza sativa subsp. indica OX=39946 GN=OsI_03747 PE=4 SV=1 - [B8A9G1_ORYSI]	0	30.99	6	2	2	4	0.000139767	0.000190977	0.0120968	0.0308442	0.731853	-0.450373
Os02g0460200	Q0E1D7	Flowering-promoting factor 1-like protein 3 OS=Oryza sativa subsp. japonica OX=39947 GN=Os02g0460200 PE=2 SV=1 - [FLP3_ORYSJ]	109.315	25.41	1	2	2	6	0.000200961	0.000273943	0.0164966	0.0346004	0.733587	-0.446961
LOC_Os10g38730	Q8LMJ0	Glutathione S-transferase GSTU6, putative, expressed OS=Oryza sativa subsp. japonica OX=39947 GN=LOC_Os10g38730 PE=4 SV=1 - [Q8LMJ0_ORYSJ]	171.339	20.58	3	4	5	10	0.000172795	0.000235052	0.00587078	0.0226233	0.735136	-0.443916
UGD3	Q9AUV6	UDP-glucose 6-dehydrogenase 3 OS=Oryza sativa subsp. japonica OX=39947 GN=UGD3 PE=2 SV=1 - [UGDH3_ORYSJ]	287.869	32.71	4	1	12	27	0.000263977	0.000358227	0.00237241	0.015326	0.736899	-0.440461
OsI_07937	B8AF07	Glucose-6-phosphate 1-dehydrogenase OS=Oryza sativa subsp. indica OX=39946 GN=OsI_07937 PE=3 SV=1 - [B8AF07_ORYSI]	70.4902	9.86	2	1	5	11	0.000171234	0.00023158	0.00362964	0.0184243	0.739415	-0.435543
OsI_05072	A2WYR6	Uncharacterized protein OS=Oryza sativa subsp. indica OX=39946 GN=OsI_05072 PE=4 SV=1 - [A2WYR6_ORYSI]	40.38	15.32	8	1	2	2	0.000146284	0.000197688	0.0115756	0.0302921	0.739973	-0.434455
OsI_06243	A2X218	Chlorophyll a-b binding protein, chloroplastic OS=Oryza sativa subsp. indica OX=39946 GN=OsI_06243 PE=3 SV=1 - [A2X218_ORYSI]	1801.69	42.38	4	8	8	167	0.000184979	0.000249843	0.0181342	0.0358999	0.740379	-0.433663
OsI_14189	B8AMR4	Uncharacterized protein OS=Oryza sativa subsp. indica OX=39946 GN=OsI_14189 PE=4 SV=1 - [B8AMR4_ORYSI]	135.158	54.33	1	6	6	9	0.000172323	0.00023266	0.000949376	0.01048	0.740665	-0.433108
OsJ_00227	B9EZB4	Uncharacterized protein OS=Oryza sativa subsp. japonica OX=39947 GN=OsJ_00227 PE=4 SV=1 - [B9EZB4_ORYSJ]	25.32	5.07	2	1	1	1	0.000151238	0.000204086	0.0217527	0.0391995	0.741051	-0.432356
OsI_16758	B8ASD9	Uncharacterized protein OS=Oryza sativa subsp. indica OX=39946 GN=OsI_16758 PE=3 SV=1 - [B8ASD9_ORYSI]	44.293	19.87	3	1	5	7	0.000150169	0.000202639	0.0491625	0.0598237	0.741067	-0.432324
Os11g0116300	Q2RBC7	Chalcone-flavonone isomerase family protein OS=Oryza sativa subsp. japonica OX=39947 GN=Os11g0116300 PE=2 SV=2 - [Q2RBC7_ORYSJ]	208.749	43.87	3	1	8	13	0.000190048	0.000256375	0.0352078	0.0497344	0.741291	-0.431888
OsI_13909	B8ALB7	DNA (cytosine-5)-methyltransferase OS=Oryza sativa subsp. indica OX=39946 GN=OsI_13909 PE=3 SV=1 - [B8ALB7_ORYSI]	46.49	0.59	2	1	1	2	0.000168466	0.000227183	0.000866511	0.0101971	0.741541	-0.431402
OsI_017815	A2Y0H2	REF/SRPP-like protein OsI_017815 OS=Oryza sativa subsp. indica OX=39946 GN=OsI_017815 PE=3 SV=1 - [Y5513_ORYSI]	180.826	38.74	2	9	9	17	0.000212631	0.000286534	0.000209067	0.00651362	0.74208	-0.430354
Os02g0612000	A0A0P0VLJ4	GrpE protein homolog (Fragment) OS=Oryza sativa subsp. japonica OX=39947 GN=Os02g0612000 PE=3 SV=1 - [A0A0P0VLJ4_ORYSJ]	640.172	47.12	5	10	10	41	0.000144461	0.000194375	0.0368254	0.0510476	0.743205	-0.428167
OsJ_16572	B9FD83	Uncharacterized protein OS=Oryza sativa subsp. japonica OX=39947 GN=OsJ_16572 PE=4 SV=1 - [B9FD83_ORYSJ]	24.05	2.87	2	1	1	1	0.000183664	0.000247117	0.00514339	0.0214677	0.743224	-0.42813
OsJ_17130	B9FMG7	Uncharacterized protein OS=Oryza sativa subsp. japonica OX=39947 GN=OsJ_17130 PE=4 SV=1 - [B9FMG7_ORYSJ]	76.9608	14.07	4	4	4	6	0.000214513	0.000288348	0.000216396	0.00654695	0.743935	-0.426751
LOC_Os03g25390	Q10KU7	Novel plant SNARE 11, putative, expressed OS=Oryza sativa subsp. japonica OX=39947 GN=LOC_Os03g25390 PE=4 SV=1 - [Q10KU7_ORYSJ]	38.7805	10.81	7	1	2	2	0.000174322	0.00023354	0.0464054	0.0580333	0.74643	-0.421921
OsI_26600	A2YMZ1	Chlorophyll a-b binding protein, chloroplastic OS=Oryza sativa subsp. indica OX=39946 GN=OsI_26600 PE=3 SV=1 - [A2YMZ1_ORYSI]	163.737	28.14	2	5	5	20	0.000183912	0.000246347	0.000154787	0.00618741	0.746556	-0.421677
COX2	P04373	Cytochrome c oxidase subunit 2 OS=Oryza sativa subsp. japonica OX=39947 GN=COX2 PE=3 SV=4 - [COX2_ORYSJ]	61.4817	8.46	3	2	2	3	0.000177468	0.000237213	0.00014148	0.00607715	0.748136	-0.418628
OsI_33317	B8BGJ2	Uncharacterized protein OS=Oryza sativa subsp. indica OX=39946 GN=OsI_33317 PE=4 SV=1 - [B8BGJ2_ORYSI]	59.0114	24.54	6	3	6	9	0.000168934	0.000225773	0.0205373	0.0381193	0.748246	-0.418416
OJ1457_D07.114	Q8H4Q9	GTP-binding protein Rab6 OS=Oryza sativa subsp. japonica OX=39947 GN=OJ1457_D07.114 PE=4 SV=1 - [Q8H4Q9_ORYSJ]	313.514	48.56	5	8	9	31	0.000168838	0.000225301	0.000125324	0.00592216	0.74939	-0.416212
OsJ_26610	B9FZW2	Uncharacterized protein OS=Oryza sativa subsp. japonica OX=39947 GN=OsJ_26610 PE=3 SV=1 - [B9FZW2_ORYSJ]	37.32	5.92	2	1	1	1	0.000190905	0.000254708	0.0379368	0.0519218	0.749505	-0.41599
GAPDH	O22387	Glyceraldehyde-3-phosphate dehydrogenase (Fragment) OS=Oryza sativa OX=4530 GN=GAPDH PE=2 SV=1 - [O22387_ORYSA]	4230.71	73.13	1	3	20	327	0.000184311	0.000245812	0.00159444	0.0131226	0.749803	-0.415417
Os04g0457000	Q7XV11	Chlorophyll a-b binding protein, chloroplastic OS=Oryza sativa subsp. japonica OX=39947 GN=Os04g0457000 PE=2 SV=1 - [Q7XV11_ORYSJ]	2635.29	45.24	3	9	9	157	0.00018737	0.000249811	0.015261	0.0336707	0.750047	-0.414947
Os02g0229400	A0A0P0VGR3	Os02g0229400 protein (Fragment) OS=Oryza sativa subsp. japonica OX=39947 GN=Os02g0229400 PE=3 SV=1 - [A0A0P0VGR3_ORYSJ]	27.62	3.39	3	3	3	3	0.000174468	0.00023225	0.000268815	0.0067388	0.751209	-0.412714
OsI_25296	B8B881	Uncharacterized protein OS=Oryza sativa subsp. indica OX=39946 GN=OsI_25296 PE=4 SV=1 - [B8B881_ORYSI]	0	9.86	2	1	1	1	0.0001499	0.000199386	0.0175757	0.0354616	0.75181	-0.41156
OsI_29344	A2YVI4	Uncharacterized protein OS=Oryza sativa subsp. indica OX=39946 GN=OsI_29344 PE=3 SV=1 - [A2YVI4_ORYSI]	89.8585	41.05	4	8	8	19	0.000204795	0.00027156	0.00773476	0.025535	0.754142	-0.407093
OsI_11073	B8ALJ7	Uncharacterized protein OS=Oryza sativa subsp. indica OX=39946 GN=OsI_11073 PE=4 SV=1 - [B8ALJ7_ORYSI]	0	6.12	1	1	2	2	0.000177984	0.000235918	0.00510852	0.0214098	0.754432	-0.406537
Os02g0320300	Q6EQW2	Chalcone-flavonone isomerase family protein OS=Oryza sativa subsp. japonica OX=39947 GN=Os02g0320300 PE=2 SV=1 - [Q6EQW2_ORYSJ]	41.72	9.64	3	2	2	5	0.000166772	0.000220566	0.0122156	0.0309662	0.75611	-0.403333
Os08g0344300	Q6ZB58	Mitochondrial pyruvate carrier OS=Oryza sativa subsp. japonica OX=39947 GN=Os08g0344300 PE=2 SV=1 - [Q6ZB58_ORYSJ]	28.4926	32.11	3	1	3	4	0.000172847	0.000228534	0.0158844	0.0341401	0.756329	-0.402914
OsI_37639	B8BNE7	Uncharacterized protein OS=Oryza sativa subsp. indica OX=39946 GN=OsI_37639 PE=4 SV=1 - [B8BNE7_ORYSI]	38.6	3.37	1	1	1	1	0.000166035	0.000219453	0.0134071	0.032115	0.756584	-0.402428
rvs1	Q8S489	Susceptibility transcription factor RVS1 (Fragment) OS=Oryza sativa OX=4530 GN=rvs1 PE=2 SV=1 - [Q8S489_ORYSA]	42.25	10.47	7	2	2	3	0.000188706	0.000249301	0.0192019	0.0369021	0.756941	-0.401746
Os08g0559200	Q6YZI2	Os08g0559200 protein OS=Oryza sativa subsp. japonica OX=39947 GN=Os08g0559200 PE=2 SV=1 - [Q6YZI2_ORYSJ]	76.7948	44.44	8	6	6	10	0.000174821	0.000230893	0.000286538	0.0067896	0.757152	-0.401346
OsI_02297	A2WR13	Uncharacterized protein OS=Oryza sativa subsp. indica OX=39946 GN=OsI_02297 PE=4 SV=1 - [A2WR13_ORYSI]	32.43	1.98	3	1	1	1	0.0001729	0.000228353	0.0294075	0.0451984	0.757163	-0.401324
rpl14	P0C439	50S ribosomal protein L14, chloroplastic OS=Oryza sativa subsp. indica OX=39946 GN=rpl14 PE=3 SV=1 - [RK14_ORYSI]	379.442	69.11	5	2	8	61	0.000156814	0.000206935	0.00947156	0.0278354	0.757796	-0.40012
OsJ_13518	B9FD14	Uncharacterized protein OS=Oryza sativa subsp. japonica OX=39947 GN=OsJ_13518 PE=4 SV=1 - [B9FD14_ORYSJ]	0	11.65	3	2	2	2	0.000169825	0.000224085	0.0388028	0.0525877	0.757857	-0.400002
Os02g0541700	Q6ESZ6	Cytochrome b-c1 complex subunit 6 OS=Oryza sativa subsp. japonica OX=39947 GN=Os02g0541700 PE=3 SV=1 - [Q6ESZ6_ORYSJ]	39.448	42.03	3	4	4	6	0.000160811	0.000211971	0.00133621	0.0121111	0.758643	-0.398507
H0818H01.12	Q259P4	Reticulon-like protein OS=Oryza sativa OX=4530 GN=H0818H01.12 PE=4 SV=1 - [Q259P4_ORYSA]	32.02	5.21	2	1	1	1	0.000176898	0.000233004	0.00252135	0.0156763	0.759208	-0.397433
Os07g0462200	Q6Z3C2	Os07g0462200 protein OS=Oryza sativa subsp. japonica OX=39947 GN=Os07g0462200 PE=2 SV=1 - [Q6Z3C2_ORYSJ]	37.61	4.86	1	1	1	2	0.000267694	0.000352234	0.0257165	0.0423231	0.759991	-0.395946
sams	Q1H9B9	S-adenosylmethionine synthase (Fragment) OS=Oryza sativa OX=4530 GN=sams PE=3 SV=1 - [Q1H9B9_ORYSA]	102.976	38.56	9	5	12	23	0.000180789	0.000237881	0.000539942	0.00867039	0.759998	-0.395933
GF14C	Q6ZKC0	14-3-3-like protein GF14-C OS=Oryza sativa subsp. japonica OX=39947 GN=GF14C PE=1 SV=1 - [14333_ORYSJ]	677.078	57.42	3	8	14	51	0.000176005	0.000231512	0.0159227	0.0341682	0.760239	-0.395475
Os10g0530900	A0A0P0XXH4	Os10g0530900 protein (Fragment) OS=Oryza sativa subsp. japonica OX=39947 GN=Os10g0530900 PE=4 SV=1 - [A0A0P0XXH4_ORYSJ]	105.77	16.87	5	2	3	9	0.000196559	0.000258324	0.0101938	0.0287357	0.760899	-0.394223
GATC	A2XK57	Glutamyl-tRNA(Gln) amidotransferase subunit C, chloroplastic/mitochondrial OS=Oryza sativa subsp. indica OX=39946 GN=GATC PE=3 SV=1 - [GATC_ORYSI]	85.2609	32.68	1	4	4	9	0.000172719	0.0002268	0.00812523	0.0260723	0.761548	-0.392994
Os03g0406200	Q40682	Elongation factor 1-delta 2 OS=Oryza sativa subsp. japonica OX=39947 GN=Os03g0406200 PE=2 SV=3 - [EF1D2_ORYSJ]	222.4	45.13	4	5	8	18	0.000162949	0.000213875	0.0091337	0.0273875	0.76189	-0.392346
OsI_37977	B8BP39	Uncharacterized protein OS=Oryza sativa subsp. indica OX=39946 GN=OsI_37977 PE=4 SV=1 - [B8BP39_ORYSI]	34.59	3.73	2	1	1	1	0.000151259	0.000198176	0.0031964	0.0173914	0.763252	-0.389768
OsJ_03840	B9ETU6	Uncharacterized protein OS=Oryza sativa subsp. japonica OX=39947 GN=OsJ_03840 PE=4 SV=1 - [B9ETU6_ORYSJ]	84.4127	25.31	4	6	6	13	0.000171968	0.000225233	0.000626062	0.00914699	0.763514	-0.389274
petB	A0A173CU42	Cytochrome b6 OS=Oryza sativa subsp. indica OX=39946 GN=petB PE=3 SV=1 - [A0A173CU42_ORYSI]	1090.73	28.84	6	5	5	57	0.000143408	0.000187567	0.00235988	0.0152953	0.764568	-0.387283
PSAH	Q0DG05	Photosystem I reaction center subunit VI, chloroplastic OS=Oryza sativa subsp. japonica OX=39947 GN=PSAH PE=2 SV=1 - [PSAH_ORYSJ]	169.646	16.2	1	3	3	46	0.000188321	0.000246263	0.00965774	0.0280747	0.764714	-0.387008
OsI_21398	A2Y8L7	Uncharacterized protein OS=Oryza sativa subsp. indica OX=39946 GN=OsI_21398 PE=3 SV=1 - [A2Y8L7_ORYSI]	246.441	27.93	4	11	12	31	0.000204391	0.000267093	0.000957671	0.0105064	0.765244	-0.386008
Os02g0767700	Q6Z302	Os02g0767700 protein OS=Oryza sativa subsp. japonica OX=39947 GN=Os02g0767700 PE=2 SV=1 - [Q6Z302_ORYSJ]	129.673	23.36	3	5	5	6	0.000174528	0.000227927	0.00613777	0.0230798	0.765722	-0.385108
P0408G07.40	Q8S0P6	Peptide chain release factor-like protein OS=Oryza sativa subsp. japonica OX=39947 GN=P0408G07.40 PE=4 SV=1 - [Q8S0P6_ORYSJ]	0	25.45	2	2	2	2	0.000143976	0.000187973	0.00985909	0.0283278	0.765941	-0.384695
OsJ_36537	A3CII5	Uncharacterized protein OS=Oryza sativa subsp. japonica OX=39947 GN=OsJ_36537 PE=4 SV=1 - [A3CII5_ORYSJ]	41.62	14.06	3	1	1	1	0.00017755	0.000231706	0.00205611	0.0145329	0.766274	-0.384068
OsI_30263	A2YY39	Uncharacterized protein OS=Oryza sativa subsp. indica OX=39946 GN=OsI_30263 PE=4 SV=1 - [A2YY39_ORYSI]	211.006	37.7	6	3	4	10	0.000177177	0.000231057	0.00554989	0.0221131	0.766812	-0.383056
PR1	A0A0D3QSW1	Pathogenesis related protein 1 OS=Oryza sativa subsp. indica OX=39946 GN=PR1 PE=2 SV=1 - [A0A0D3QSW1_ORYSI]	70.9955	26.17	5	2	2	2	0.000249807	0.000325436	0.0124681	0.0312207	0.767607	-0.38156
B0812A04.3	Q25A95	B0812A04.3 protein OS=Oryza sativa OX=4530 GN=B0812A04.3 PE=4 SV=1 - [Q25A95_ORYSA]	450.214	58.1	6	13	13	45	0.000146061	0.000190101	0.0165515	0.0346459	0.768335	-0.380192
atpE	P0C2Z2	ATP synthase epsilon chain, chloroplastic OS=Oryza sativa subsp. indica OX=39946 GN=atpE PE=3 SV=1 - [ATPE_ORYSI]	421.543	71.53	2	4	7	53	0.000149182	0.000193808	0.0273556	0.0435262	0.76974	-0.377558
OsI_32104	A2Z3A4	Rhomboid-like protein OS=Oryza sativa subsp. indica OX=39946 GN=OsI_32104 PE=3 SV=1 - [A2Z3A4_ORYSI]	79.0327	9.91	1	2	2	2	0.000177678	0.000230714	0.000940865	0.0104525	0.770123	-0.376839
OsJ_01499	A2ZSE1	Uncharacterized protein OS=Oryza sativa subsp. japonica OX=39947 GN=OsJ_01499 PE=4 SV=1 - [A2ZSE1_ORYSJ]	0	25.46	7	1	6	7	0.000170554	0.000221012	0.00743554	0.0251018	0.771698	-0.373891
OsI_03680	B8A9D2	Uncharacterized protein OS=Oryza sativa subsp. indica OX=39946 GN=OsI_03680 PE=4 SV=1 - [B8A9D2_ORYSI]	130.236	27.26	5	9	9	17	0.000193423	0.000250589	0.0038843	0.0190251	0.771872	-0.373566
Os12g0611200	Q0ILZ4	DEAD-box ATP-dependent RNA helicase 9 OS=Oryza sativa subsp. japonica OX=39947 GN=Os12g0611200 PE=2 SV=1 - [RH9_ORYSJ]	0	0.96	3	1	1	1	0.000196176	0.000254123	0.0193889	0.0370718	0.771971	-0.373381
OsI_25157	A2YIV4	Uncharacterized protein OS=Oryza sativa subsp. indica OX=39946 GN=OsI_25157 PE=3 SV=1 - [A2YIV4_ORYSI]	43.26	14.8	2	2	2	2	0.000189416	0.000245218	0.014465	0.0330338	0.772438	-0.372508
GF14B	Q7XTE8	14-3-3-like protein GF14-B OS=Oryza sativa subsp. japonica OX=39947 GN=GF14B PE=1 SV=2 - [14332_ORYSJ]	676.814	53.82	3	4	13	66	0.000177303	0.000229485	0.0298813	0.0455685	0.772611	-0.372185
OsI_36131	A2ZEB7	Uncharacterized protein OS=Oryza sativa subsp. indica OX=39946 GN=OsI_36131 PE=4 SV=1 - [A2ZEB7_ORYSI]	44.8379	26.7	3	3	3	6	0.000163956	0.000212093	0.0417251	0.0547557	0.77304	-0.371386
Os03g0196400	Q0DUB1	CASP-like protein (Fragment) OS=Oryza sativa subsp. japonica OX=39947 GN=Os03g0196400 PE=3 SV=1 - [Q0DUB1_ORYSJ]	44.52	19.42	3	2	2	2	0.000187775	0.000242874	0.000775968	0.00984185	0.773139	-0.3712
OsI_30285	A2YY59	Superoxide dismutase [Cu-Zn] OS=Oryza sativa subsp. indica OX=39946 GN=OsI_30285 PE=3 SV=1 - [A2YY59_ORYSI]	1703.79	56.65	6	8	8	75	0.000242767	0.000313669	0.000294782	0.00681138	0.77396	-0.369669
NOL	Q84ST4	Chlorophyll(ide) b reductase NOL, chloroplastic OS=Oryza sativa subsp. japonica OX=39947 GN=NOL PE=1 SV=1 - [NOL_ORYSJ]	39.5	7	1	2	2	3	0.000180115	0.000232711	0.0156968	0.0340014	0.773986	-0.36962
OsJ_15259	A3AV21	Uncharacterized protein OS=Oryza sativa subsp. japonica OX=39947 GN=OsJ_15259 PE=4 SV=1 - [A3AV21_ORYSJ]	24.48	4.27	2	2	2	3	0.000167839	0.000216415	0.044759	0.0569159	0.775545	-0.366718
OsJ_07605	A3A997	Uncharacterized protein OS=Oryza sativa subsp. japonica OX=39947 GN=OsJ_07605 PE=3 SV=1 - [A3A997_ORYSJ]	459.959	24.29	6	6	6	28	0.000184612	0.000237998	3.3949e-06	0.00234293	0.775686	-0.366455
OsI_17711	B8AVK8	Uncharacterized protein OS=Oryza sativa subsp. indica OX=39946 GN=OsI_17711 PE=4 SV=1 - [B8AVK8_ORYSI]	74.955	25.17	5	5	5	6	0.000159842	0.000205985	0.000934888	0.0104331	0.775992	-0.365887
psbD	P0C436	Photosystem II D2 protein OS=Oryza sativa subsp. indica OX=39946 GN=psbD PE=3 SV=1 - [PSBD_ORYSI]	2510.05	25.21	8	4	8	171	0.000188042	0.00024227	0.00240738	0.0154107	0.776165	-0.365565
OsI_26845	A2YNM6	Uncharacterized protein OS=Oryza sativa subsp. indica OX=39946 GN=OsI_26845 PE=3 SV=1 - [A2YNM6_ORYSI]	139.44	40.41	2	3	5	11	0.000150533	0.000193843	0.00332802	0.0176785	0.776575	-0.364803
OsI_05317	A2WZD9	Peroxidase OS=Oryza sativa subsp. indica OX=39946 GN=OsI_05317 PE=3 SV=1 - [A2WZD9_ORYSI]	56.8507	18.26	1	4	6	8	0.000169895	0.000218553	0.0103575	0.0289296	0.777364	-0.363337
OsJ_09012	B9F4Q2	Uncharacterized protein OS=Oryza sativa subsp. japonica OX=39947 GN=OsJ_09012 PE=4 SV=1 - [B9F4Q2_ORYSJ]	29.8	7.8	3	2	2	2	0.000148641	0.000191053	0.00726724	0.0248532	0.778009	-0.362141
Os08g0292900	A0A0P0XEB4	Os08g0292900 protein (Fragment) OS=Oryza sativa subsp. japonica OX=39947 GN=Os08g0292900 PE=3 SV=1 - [A0A0P0XEB4_ORYSJ]	45.489	18.48	32	2	4	5	0.000207729	0.000266587	0.0179645	0.0357622	0.779217	-0.359902
OsI_27602	A2YQN3	Uncharacterized protein OS=Oryza sativa subsp. indica OX=39946 GN=OsI_27602 PE=3 SV=1 - [A2YQN3_ORYSI]	438.031	45.45	3	2	2	13	0.000158576	0.000203461	0.00613071	0.023068	0.779396	-0.359571
OsI_11477	A2XGG9	Ribosomal protein L19 OS=Oryza sativa subsp. indica OX=39946 GN=OsI_11477 PE=3 SV=1 - [A2XGG9_ORYSI]	226.373	36.54	3	3	8	18	0.000167209	0.00021404	0.0160232	0.0342413	0.781206	-0.356224
OsI_23611	A2YER6	Uncharacterized protein OS=Oryza sativa subsp. indica OX=39946 GN=OsI_23611 PE=4 SV=1 - [A2YER6_ORYSI]	100.108	52.27	2	3	8	16	0.000202087	0.000258112	0.00988306	0.0283575	0.782944	-0.353019
OsJ_24193	A3BJL6	Uncharacterized protein OS=Oryza sativa subsp. japonica OX=39947 GN=OsJ_24193 PE=4 SV=1 - [A3BJL6_ORYSJ]	111.98	21.21	3	2	5	6	0.000176266	0.000225062	0.0198875	0.0375159	0.783191	-0.352564
OSJNBa0036E02.13	Q7F7G0	Putative DNA-binding protein OS=Oryza sativa subsp. japonica OX=39947 GN=OSJNBa0036E02.13 PE=4 SV=1 - [Q7F7G0_ORYSJ]	0	2.03	5	1	1	1	0.000144027	0.000183746	0.00263867	0.0160061	0.783838	-0.351373
OsI_22755	A2YCB9	Chlorophyll a-b binding protein, chloroplastic OS=Oryza sativa subsp. indica OX=39946 GN=OsI_22755 PE=3 SV=1 - [A2YCB9_ORYSI]	276.495	29.88	2	6	6	42	0.000192653	0.000245471	0.0265581	0.0429178	0.78483	-0.349549
RCABP89	Q10HD0	Chlorophyll a-b binding protein, chloroplastic OS=Oryza sativa subsp. japonica OX=39947 GN=RCABP89 PE=2 SV=1 - [CB23_ORYSJ]	1445.54	57.03	5	7	10	158	0.000197777	0.000251948	0.0133051	0.0320216	0.784992	-0.349251
OsI_11064	B8ALJ3	Uncharacterized protein OS=Oryza sativa subsp. indica OX=39946 GN=OsI_11064 PE=4 SV=1 - [B8ALJ3_ORYSI]	163.228	39.33	5	8	8	16	0.000169481	0.000215884	0.00278018	0.0163842	0.785058	-0.349129
PETE	Q0DFC9	Plastocyanin, chloroplastic OS=Oryza sativa subsp. japonica OX=39947 GN=PETE PE=1 SV=1 - [PLAS_ORYSJ]	1135.08	46.1	1	3	3	125	0.000385827	0.000490724	0.0325821	0.0475725	0.78624	-0.346958
Os01g0920000	Q5JJJ9	CBS domain containing protein-like OS=Oryza sativa subsp. japonica OX=39947 GN=Os01g0920000 PE=4 SV=1 - [Q5JJJ9_ORYSJ]	29.86	2.34	3	1	1	1	0.000167627	0.000213131	0.0131397	0.0318683	0.786496	-0.346488
Os10g0539900	A0A0P0XWP3	Os10g0539900 protein (Fragment) OS=Oryza sativa subsp. japonica OX=39947 GN=Os10g0539900 PE=4 SV=1 - [A0A0P0XWP3_ORYSJ]	44.2706	27.4	6	6	6	9	0.000184958	0.000234944	0.0167364	0.0347976	0.787245	-0.345115
OsI_26347	B8B6Z9	Uncharacterized protein OS=Oryza sativa subsp. indica OX=39946 GN=OsI_26347 PE=3 SV=1 - [B8B6Z9_ORYSI]	36.38	10.22	4	4	4	4	0.000207685	0.000263661	0.0104518	0.0290398	0.787697	-0.344287
PIP2-6	Q7XLR1	Probable aquaporin PIP2-6 OS=Oryza sativa subsp. japonica OX=39947 GN=PIP2-6 PE=2 SV=2 - [PIP26_ORYSJ]	96.648	14.18	3	3	3	12	0.000216776	0.000275161	0.0254858	0.0421562	0.787814	-0.344074
COX5C	Q9SXX7	Cytochrome c oxidase subunit 5C OS=Oryza sativa subsp. japonica OX=39947 GN=COX5C PE=3 SV=3 - [COX5C_ORYSJ]	70.24	39.68	1	3	3	7	0.000181225	0.000229832	0.010521	0.0291198	0.788509	-0.342801
Os01g0685800	A0A0P0V6Q2	ATP synthase subunit beta (Fragment) OS=Oryza sativa subsp. japonica OX=39947 GN=Os01g0685800 PE=3 SV=1 - [A0A0P0V6Q2_ORYSJ]	2982.2	76.57	6	2	26	219	0.000174914	0.000221693	0.000795312	0.00992231	0.788992	-0.341917
GER4	Q7F731	Germin-like protein 1-1 OS=Oryza sativa subsp. japonica OX=39947 GN=GER4 PE=2 SV=1 - [GL11_ORYSJ]	18.59	4.63	1	1	1	2	0.000209515	0.000265428	0.000302551	0.00683094	0.789347	-0.341269
Os07g0661300	Q0D3X3	Os07g0661300 protein (Fragment) OS=Oryza sativa subsp. japonica OX=39947 GN=Os07g0661300 PE=4 SV=1 - [Q0D3X3_ORYSJ]	0	2.66	2	1	1	1	0.000173156	0.00021915	0.036531	0.0508123	0.790124	-0.339848
OsI_20971	B8AWQ3	Uncharacterized protein OS=Oryza sativa subsp. indica OX=39946 GN=OsI_20971 PE=3 SV=1 - [B8AWQ3_ORYSI]	36.95	16.5	2	3	3	3	0.000175202	0.000221649	0.00606575	0.0229581	0.79045	-0.339254
OsI_29890	B8B8W5	Uncharacterized protein OS=Oryza sativa subsp. indica OX=39946 GN=OsI_29890 PE=4 SV=1 - [B8B8W5_ORYSI]	71.4537	10.24	1	2	2	3	0.000179147	0.000226528	0.0231127	0.040336	0.790835	-0.338551
OsI_13691	B8AKJ8	Uncharacterized protein OS=Oryza sativa subsp. indica OX=39946 GN=OsI_13691 PE=3 SV=1 - [B8AKJ8_ORYSI]	157.394	32.65	1	3	3	15	0.000195047	0.000246511	0.00140124	0.0123846	0.791229	-0.337832
OsI_01951	B8A885	Uncharacterized protein OS=Oryza sativa subsp. indica OX=39946 GN=OsI_01951 PE=3 SV=1 - [B8A885_ORYSI]	25.81	6.19	5	1	5	6	0.000245021	0.000309638	0.0459706	0.0577418	0.791314	-0.337677
OsJ_35978	A3CH04	Uncharacterized protein OS=Oryza sativa subsp. japonica OX=39947 GN=OsJ_35978 PE=3 SV=1 - [A3CH04_ORYSJ]	33.86	4.61	20	1	2	3	0.000220469	0.000277667	0.00466449	0.0206288	0.794005	-0.332779
PEX11-5	Q5VRJ8	Peroxisomal membrane protein 11-5 OS=Oryza sativa subsp. japonica OX=39947 GN=PEX11-5 PE=2 SV=1 - [PX115_ORYSJ]	30.1082	14.16	2	2	3	6	0.000199174	0.00025073	0.0493307	0.0599298	0.794376	-0.332105
OsI_00826	A2WLV8	Uncharacterized protein OS=Oryza sativa subsp. indica OX=39946 GN=OsI_00826 PE=3 SV=1 - [A2WLV8_ORYSI]	256.446	34.62	11	1	5	18	0.000143874	0.00018106	0.00266129	0.0160678	0.794624	-0.331656
OsI_13588	A2XM46	Uncharacterized protein OS=Oryza sativa subsp. indica OX=39946 GN=OsI_13588 PE=3 SV=1 - [A2XM46_ORYSI]	87.1214	40.78	9	9	11	24	0.000174612	0.000219458	7.09038e-05	0.00543703	0.795653	-0.32979
OsI_26372	A2YMB7	Beta-amylase OS=Oryza sativa subsp. indica OX=39946 GN=OsI_26372 PE=3 SV=1 - [A2YMB7_ORYSI]	137.45	31.35	6	11	11	17	0.000280785	0.000352818	0.00401032	0.0193071	0.795834	-0.329461
OsI_07131	B8AHH6	Uncharacterized protein OS=Oryza sativa subsp. indica OX=39946 GN=OsI_07131 PE=4 SV=1 - [B8AHH6_ORYSI]	68.3797	46.51	4	6	6	8	0.00015513	0.000194809	0.0269145	0.0431633	0.796316	-0.328587
OsI_22823	A2YCI2	Uncharacterized protein OS=Oryza sativa subsp. indica OX=39946 GN=OsI_22823 PE=3 SV=1 - [A2YCI2_ORYSI]	241.846	14.11	3	3	3	10	0.00021263	0.000266987	0.00156455	0.0130152	0.796407	-0.328423
ACT3	A2XNS1	Actin-3 OS=Oryza sativa subsp. indica OX=39946 GN=ACT3 PE=3 SV=2 - [ACT3_ORYSI]	622.327	48.28	1	2	14	60	0.00018674	0.000234444	0.0109951	0.0296522	0.796522	-0.328214
OsJ_03676	B9ETC3	Secretory carrier-associated membrane protein OS=Oryza sativa subsp. japonica OX=39947 GN=OsJ_03676 PE=3 SV=1 - [B9ETC3_ORYSJ]	36.7033	4.21	2	1	1	4	0.000199239	0.000250092	0.0153896	0.0337696	0.796661	-0.327962
OJ1715_A07.14	Q6ZKZ4	Putative ras-related protein OS=Oryza sativa subsp. japonica OX=39947 GN=OJ1715_A07.14 PE=2 SV=1 - [Q6ZKZ4_ORYSJ]	154.086	48.84	4	5	11	23	0.000181772	0.000228018	0.00264416	0.0160211	0.79718	-0.327023
OsI_31925	A2Z2T0	Peptidylprolyl isomerase OS=Oryza sativa subsp. indica OX=39946 GN=OsI_31925 PE=4 SV=1 - [A2Z2T0_ORYSI]	72.7338	26.62	4	1	3	7	0.000202377	0.000253616	0.00636141	0.0234478	0.797964	-0.325604
OsI_34473	A2Z9R0	Uncharacterized protein OS=Oryza sativa subsp. indica OX=39946 GN=OsI_34473 PE=4 SV=1 - [A2Z9R0_ORYSI]	69.6959	5.23	3	1	1	3	0.000201054	0.000251638	0.0158527	0.0341168	0.798983	-0.323764
OsI_10762	B8AK27	Uncharacterized protein OS=Oryza sativa subsp. indica OX=39946 GN=OsI_10762 PE=3 SV=1 - [B8AK27_ORYSI]	128.675	33.86	1	1	6	11	0.000225218	0.000281833	0.0268954	0.0431502	0.799118	-0.32352
OsJ_24590	B9FXP8	Uncharacterized protein OS=Oryza sativa subsp. japonica OX=39947 GN=OsJ_24590 PE=3 SV=1 - [B9FXP8_ORYSJ]	33.27	3.45	2	1	1	1	0.000182792	0.000228312	0.0260183	0.0425389	0.800626	-0.320799
Os03g0580200	Q0DQM3	Os03g0580200 protein (Fragment) OS=Oryza sativa subsp. japonica OX=39947 GN=Os03g0580200 PE=4 SV=1 - [Q0DQM3_ORYSJ]	53.02	15.85	3	2	2	2	0.000270577	0.000337794	0.00432138	0.0199636	0.801012	-0.320105
Os12g0405200	Q2QT64	Expressed protein OS=Oryza sativa subsp. japonica OX=39947 GN=Os12g0405200 PE=2 SV=1 - [Q2QT64_ORYSJ]	51.9	5.72	2	1	1	1	0.000199316	0.000248654	0.0303088	0.0458975	0.801582	-0.319078
GME-2	Q2R1V8	GDP-mannose 3,5-epimerase 2 OS=Oryza sativa subsp. japonica OX=39947 GN=GME-2 PE=2 SV=2 - [GME2_ORYSJ]	181.813	38.01	3	5	12	22	0.000201161	0.000250826	0.010973	0.029628	0.801995	-0.318335
OsI_11989	A2XHV1	Uncharacterized protein OS=Oryza sativa subsp. indica OX=39946 GN=OsI_11989 PE=3 SV=1 - [A2XHV1_ORYSI]	95.2318	54.79	2	3	8	16	0.000166694	0.000207748	0.000451843	0.00808395	0.802383	-0.317637
OsI_18741	A2Y154	Malic enzyme OS=Oryza sativa subsp. indica OX=39946 GN=OsI_18741 PE=3 SV=1 - [A2Y154_ORYSI]	220.843	19.3	14	4	8	15	0.000203455	0.000253446	0.0110721	0.0297361	0.802757	-0.316965
OsI_01215	B8ABU1	Uncharacterized protein OS=Oryza sativa subsp. indica OX=39946 GN=OsI_01215 PE=3 SV=1 - [B8ABU1_ORYSI]	173.156	45.6	5	4	8	17	0.000165676	0.000206248	0.0465328	0.0581181	0.803286	-0.316014
UGLYAH	Q7F1K9	Probable (S)-ureidoglycine aminohydrolase OS=Oryza sativa subsp. japonica OX=39947 GN=UGLYAH PE=1 SV=1 - [UGHY_ORYSJ]	0	4.53	1	1	1	1	0.00023246	0.000289338	0.0201711	0.037781	0.803418	-0.315777
ndhK	A0A0N9E067	NAD(P)H-quinone oxidoreductase subunit K, chloroplastic OS=Oryza sativa aromatic subgroup OX=1736658 GN=ndhK PE=3 SV=1 - [A0A0N9E067_ORYSJ]	169.287	42.29	6	3	6	13	0.000172539	0.000214643	0.000987877	0.0105998	0.803841	-0.315017
PFK	A2ZQ69	ATP-dependent 6-phosphofructokinase OS=Oryza sativa subsp. japonica OX=39947 GN=PFK PE=3 SV=1 - [A2ZQ69_ORYSJ]	100.168	12.13	5	2	5	9	0.000172955	0.000214899	0.0304555	0.0460093	0.80482	-0.313261
Os02g0754300	Q6Z6A0	Os02g0754300 protein OS=Oryza sativa subsp. japonica OX=39947 GN=Os02g0754300 PE=2 SV=1 - [Q6Z6A0_ORYSJ]	158.855	24.85	3	7	7	24	0.000172392	0.00021418	0.00465694	0.0206148	0.804894	-0.313129
OsI_25849	A2YKV5	Mitochondrial pyruvate carrier OS=Oryza sativa subsp. indica OX=39946 GN=OsI_25849 PE=3 SV=1 - [A2YKV5_ORYSI]	34.31	32.11	3	1	3	4	0.000189461	0.000235329	0.0399348	0.0534389	0.80509	-0.312779
OsI_30262	B8B9K7	Uncharacterized protein OS=Oryza sativa subsp. indica OX=39946 GN=OsI_30262 PE=4 SV=1 - [B8B9K7_ORYSI]	31.1287	34.83	3	5	6	12	0.000225468	0.000279327	0.00116403	0.0113145	0.807184	-0.309031
OsI_13733	A2XMI1	Uncharacterized protein OS=Oryza sativa subsp. indica OX=39946 GN=OsI_13733 PE=4 SV=1 - [A2XMI1_ORYSI]	1794.94	38.98	3	8	8	119	0.000198689	0.000246	0.00263488	0.0159957	0.807678	-0.308148
COX6b2	Q9FE02	Cytochrome c oxidase subunit OS=Oryza sativa subsp. japonica OX=39947 GN=COX6b2 PE=2 SV=1 - [Q9FE02_ORYSJ]	40.5743	33.77	3	2	3	7	0.00026352	0.000326261	0.00990309	0.0283823	0.807697	-0.308115
COPE1	Q9MAX6	Coatomer subunit epsilon-1 OS=Oryza sativa subsp. japonica OX=39947 GN=COPE1 PE=2 SV=1 - [COPE1_ORYSJ]	83.7773	17.42	1	3	3	5	0.000165144	0.000204401	0.00887126	0.0270268	0.807941	-0.307678
OsI_02711	B8AB68	Uncharacterized protein OS=Oryza sativa subsp. indica OX=39946 GN=OsI_02711 PE=4 SV=1 - [B8AB68_ORYSI]	37.92	21.31	3	3	3	4	0.000160547	0.000198679	0.0160174	0.0342371	0.808074	-0.30744
OsI_08911	B8AIF7	Uncharacterized protein OS=Oryza sativa subsp. indica OX=39946 GN=OsI_08911 PE=4 SV=1 - [B8AIF7_ORYSI]	57.5416	22.65	2	5	5	10	0.000181072	0.000224047	0.00883301	0.0269732	0.808187	-0.30724
OsI_18630	B8AYL2	Uncharacterized protein OS=Oryza sativa subsp. indica OX=39946 GN=OsI_18630 PE=4 SV=1 - [B8AYL2_ORYSI]	40.72	5.7	2	2	2	3	0.000143602	0.000177625	0.00782889	0.0256673	0.808456	-0.306758
OsI_07489	A2X5K7	Uncharacterized protein OS=Oryza sativa subsp. indica OX=39946 GN=OsI_07489 PE=3 SV=1 - [A2X5K7_ORYSI]	37.59	18.58	1	2	2	2	0.000231078	0.000285762	0.00150585	0.0127972	0.808638	-0.306435
LOC_Os03g58060	Q10C48	5'-3' exoribonuclease OS=Oryza sativa subsp. japonica OX=39947 GN=LOC_Os03g58060 PE=3 SV=1 - [Q10C48_ORYSJ]	46.5	4.84	5	2	3	4	0.000170435	0.000210231	0.0160716	0.0342764	0.810703	-0.302754
OsJ_16379	A3AXY5	Uncharacterized protein OS=Oryza sativa subsp. japonica OX=39947 GN=OsJ_16379 PE=4 SV=1 - [A3AXY5_ORYSJ]	133.291	33.33	2	8	8	12	0.000181933	0.00022434	0.0235754	0.0407065	0.810969	-0.302282
OsI_26629	A2YN19	Uncharacterized protein OS=Oryza sativa subsp. indica OX=39946 GN=OsI_26629 PE=3 SV=1 - [A2YN19_ORYSI]	68.5587	10.78	3	5	5	8	0.000157011	0.000193589	0.00437597	0.0200734	0.811053	-0.302131
psaA	P0C353	Photosystem I P700 chlorophyll a apoprotein A1 OS=Oryza sativa OX=4530 GN=psaA PE=3 SV=1 - [PSAA_ORYSA]	670.094	14.13	8	13	13	109	0.000201236	0.000248066	0.00604357	0.0229203	0.811221	-0.301834
OsI_04915	A2WYB1	AP-4 complex subunit epsilon OS=Oryza sativa subsp. indica OX=39946 GN=OsI_04915 PE=3 SV=1 - [A2WYB1_ORYSI]	54.1467	4.74	5	3	3	3	0.000198296	0.000244319	0.0230134	0.0402554	0.811626	-0.301112
LOC_Os03g12890	Q10PK8	Branched-chain-amino-acid aminotransferase OS=Oryza sativa subsp. japonica OX=39947 GN=LOC_Os03g12890 PE=3 SV=1 - [Q10PK8_ORYSJ]	34.48	10.59	5	2	2	2	0.000197895	0.000243791	0.0264425	0.0428374	0.811741	-0.300909
OsI_22165	A2YAP9	Uncharacterized protein OS=Oryza sativa subsp. indica OX=39946 GN=OsI_22165 PE=4 SV=1 - [A2YAP9_ORYSI]	32.06	12.08	1	1	1	1	0.000194067	0.000239055	0.0180703	0.0358483	0.81181	-0.300786
OsI_20640	B8B000	Gamma-glutamyl hydrolase OS=Oryza sativa subsp. indica OX=39946 GN=OsI_20640 PE=4 SV=1 - [B8B000_ORYSI]	82.934	32.94	2	7	7	8	0.000250858	0.000308963	0.00336459	0.017763	0.811933	-0.300567
OsI_31697	A2Z263	Uncharacterized protein OS=Oryza sativa subsp. indica OX=39946 GN=OsI_31697 PE=3 SV=1 - [A2Z263_ORYSI]	161.147	50.67	1	10	10	21	0.000198962	0.000244786	0.00485173	0.0209684	0.8128	-0.299027
Os04g0532400	Q7X7F0	OSJNBa0081C01.25 protein OS=Oryza sativa subsp. japonica OX=39947 GN=Os04g0532400 PE=3 SV=2 - [Q7X7F0_ORYSJ]	33.96	8.79	3	2	3	4	0.000211946	0.000260708	0.0246204	0.0415149	0.812963	-0.298739
Os05g0496200	A0A0P0WP33	Phosphoglycerate kinase OS=Oryza sativa subsp. japonica OX=39947 GN=Os05g0496200 PE=3 SV=1 - [A0A0P0WP33_ORYSJ]	7630.62	64.46	8	23	34	456	0.00018939	0.000232847	0.00191508	0.0141462	0.813366	-0.298023
OsI_04321	B8ABP1	Coatomer subunit delta OS=Oryza sativa subsp. indica OX=39946 GN=OsI_04321 PE=3 SV=1 - [B8ABP1_ORYSI]	62.5233	8.52	3	1	4	7	0.000171632	0.000210996	0.0247298	0.0415973	0.813436	-0.297899
OsI_34227	B8BHR1	Malic enzyme OS=Oryza sativa subsp. indica OX=39946 GN=OsI_34227 PE=3 SV=1 - [B8BHR1_ORYSI]	178.886	26.61	8	13	13	24	0.000183237	0.000225227	0.00184922	0.0139535	0.813563	-0.297674
Os05g0435700	Q6I5L0	Os05g0435700 protein OS=Oryza sativa subsp. japonica OX=39947 GN=Os05g0435700 PE=2 SV=1 - [Q6I5L0_ORYSJ]	41.38	14.88	1	1	3	5	0.000193158	0.000237221	0.0201556	0.0377666	0.814253	-0.296451
OsI_21531	A2Y8Z7	Uncharacterized protein OS=Oryza sativa subsp. indica OX=39946 GN=OsI_21531 PE=4 SV=1 - [A2Y8Z7_ORYSI]	0	11.46	1	2	2	2	0.000130402	0.000160094	0.0322542	0.0473384	0.814535	-0.295951
Os01g0641100	B7FAI0	Os01g0641100 protein OS=Oryza sativa subsp. japonica OX=39947 GN=Os01g0641100 PE=2 SV=1 - [B7FAI0_ORYSJ]	0	4.53	4	1	1	2	0.000221304	0.000271659	0.0352553	0.0497737	0.814641	-0.295763
OsI_10738	B8AK12	Uncharacterized protein OS=Oryza sativa subsp. indica OX=39946 GN=OsI_10738 PE=4 SV=1 - [B8AK12_ORYSI]	59.51	3.8	8	6	6	9	0.000196012	0.000240582	0.0010128	0.0106739	0.814741	-0.295587
OsI_26031	A2YLD6	Uncharacterized protein OS=Oryza sativa subsp. indica OX=39946 GN=OsI_26031 PE=4 SV=1 - [A2YLD6_ORYSI]	0	4.88	2	1	1	1	0.000185004	0.000227015	0.00251446	0.0156606	0.814945	-0.295225
Os01g0783500	Q5ZAV7	Os01g0783500 protein OS=Oryza sativa subsp. japonica OX=39947 GN=Os01g0783500 PE=2 SV=1 - [Q5ZAV7_ORYSJ]	45.0091	25.19	3	2	3	5	0.000196609	0.000241132	0.0401954	0.0536318	0.81536	-0.294491
Os08g0117300	Q69UI1	40S ribosomal protein S13-2 OS=Oryza sativa subsp. japonica OX=39947 GN=Os08g0117300 PE=1 SV=1 - [RS132_ORYSJ]	297.035	52.32	9	1	8	25	0.000163703	0.000200771	0.00525442	0.0216489	0.815372	-0.29447
Os04g0589900	A0A0P0WE44	Os04g0589900 protein OS=Oryza sativa subsp. japonica OX=39947 GN=Os04g0589900 PE=4 SV=1 - [A0A0P0WE44_ORYSJ]	27.41	19.66	4	2	2	3	0.000217744	0.000267047	0.0211664	0.0386864	0.815376	-0.294463
Os09g0557800	A0A0P0XQB2	Transmembrane 9 superfamily member (Fragment) OS=Oryza sativa subsp. japonica OX=39947 GN=Os09g0557800 PE=3 SV=1 - [A0A0P0XQB2_ORYSJ]	29.5353	6.51	7	2	3	3	0.000184228	0.000225824	0.0383271	0.0522236	0.815805	-0.293703
OSIGBa0113I13.2	Q01KE5	alpha-1,2-Mannosidase OS=Oryza sativa OX=4530 GN=OSIGBa0113I13.2 PE=3 SV=1 - [Q01KE5_ORYSA]	38.4408	15.91	3	7	7	7	0.000192368	0.000235686	0.00576416	0.022455	0.816206	-0.292995
petD	A0A173CU24	Cytochrome b6-f complex subunit 4 OS=Oryza sativa subsp. indica OX=39946 GN=petD PE=3 SV=1 - [A0A173CU24_ORYSI]	27.3973	10.76	5	2	2	20	0.00014039	0.000171963	0.0399731	0.0534672	0.816397	-0.292657
Os04g0405600	B7EF30	Os04g0405600 protein OS=Oryza sativa subsp. japonica OX=39947 GN=Os04g0405600 PE=2 SV=1 - [B7EF30_ORYSJ]	150.503	11.16	6	4	4	7	0.000179498	0.000219661	0.000377355	0.00751644	0.817159	-0.291312
Os07g0614500	Q40680	Elongation factor 1-delta 1 OS=Oryza sativa subsp. japonica OX=39947 GN=Os07g0614500 PE=2 SV=3 - [EF1D1_ORYSJ]	726.935	54.15	5	8	11	45	0.000169426	0.00020728	0.00808604	0.0260197	0.817378	-0.290925
OsI_08819	B8AI21	Uncharacterized protein OS=Oryza sativa subsp. indica OX=39946 GN=OsI_08819 PE=3 SV=1 - [B8AI21_ORYSI]	35.02	26.09	1	3	3	4	0.000180546	0.000220807	0.0177179	0.0355703	0.817664	-0.29042
OsI_17372	B8AU50	Uncharacterized protein OS=Oryza sativa subsp. indica OX=39946 GN=OsI_17372 PE=3 SV=1 - [B8AU50_ORYSI]	153.906	36.02	9	2	7	18	0.000178084	0.000217102	4.06786e-05	0.00496719	0.820278	-0.285814
RIC1	P40392	Ras-related protein RIC1 OS=Oryza sativa subsp. japonica OX=39947 GN=RIC1 PE=2 SV=2 - [RIC1_ORYSJ]	201.2	68.32	3	8	14	32	0.00016905	0.000206076	0.000220208	0.00656354	0.820328	-0.285726
PHT1-8	Q8H6G8	Probable inorganic phosphate transporter 1-8 OS=Oryza sativa subsp. japonica OX=39947 GN=PHT1-8 PE=2 SV=1 - [PHT18_ORYSJ]	76.0887	12.94	5	4	5	7	0.000198553	0.000241797	0.0106793	0.0293007	0.821158	-0.284269
Os04g0379400	Q0JDT4	Os04g0379400 protein OS=Oryza sativa subsp. japonica OX=39947 GN=Os04g0379400 PE=2 SV=1 - [Q0JDT4_ORYSJ]	29.92	4.29	4	1	1	1	0.000134954	0.000164281	0.0392936	0.0529594	0.821486	-0.283693
OsI_28537	A2YT92	Uncharacterized protein OS=Oryza sativa subsp. indica OX=39946 GN=OsI_28537 PE=4 SV=1 - [A2YT92_ORYSI]	74.81	21.32	1	1	1	1	0.000339977	0.00041368	0.0111551	0.0298259	0.821835	-0.28308
OsI_20429	B8AZI2	Uncharacterized protein OS=Oryza sativa subsp. indica OX=39946 GN=OsI_20429 PE=4 SV=1 - [B8AZI2_ORYSI]	80.2381	23.26	1	4	4	7	0.000143783	0.000174848	0.0133064	0.0320228	0.822334	-0.282204
OsI_04485	B8ACG5	Uncharacterized protein OS=Oryza sativa subsp. indica OX=39946 GN=OsI_04485 PE=4 SV=1 - [B8ACG5_ORYSI]	41.9934	19.2	2	5	5	7	0.000185176	0.00022518	0.0442985	0.0565967	0.82235	-0.282176
OsI_15134	B8ARK2	Amine oxidase OS=Oryza sativa subsp. indica OX=39946 GN=OsI_15134 PE=3 SV=1 - [B8ARK2_ORYSI]	254.896	24	9	15	15	29	0.000213143	0.000259109	0.000932342	0.0104247	0.822602	-0.281734
Os03g0289400	Q10MY4	Os03g0289400 protein OS=Oryza sativa subsp. japonica OX=39947 GN=Os03g0289400 PE=4 SV=1 - [Q10MY4_ORYSJ]	167.061	15.64	4	3	3	8	0.000179516	0.000218002	0.00274714	0.0162971	0.823461	-0.280227
ycf3	P12203	Photosystem I assembly protein Ycf3 OS=Oryza sativa subsp. japonica OX=39947 GN=ycf3 PE=2 SV=3 - [YCF3_ORYSJ]	236.167	34.12	4	4	4	11	0.000163575	0.000198486	0.0178462	0.0356673	0.824115	-0.279082
OsI_29059	A2YUQ6	Thioredoxin-like protein CITRX, chloroplastic OS=Oryza sativa subsp. indica OX=39946 GN=OsI_29059 PE=3 SV=1 - [CITRX_ORYSI]	64.0497	27.51	2	5	5	8	0.000164201	0.000199149	0.0369264	0.051128	0.824515	-0.278382
OsI_36586	A2ZFN5	H/ACA ribonucleoprotein complex subunit OS=Oryza sativa subsp. indica OX=39946 GN=OsI_36586 PE=3 SV=1 - [A2ZFN5_ORYSI]	36.46	10.2	2	2	2	3	0.000165178	0.000199951	0.0302168	0.0458271	0.826091	-0.275627
Os04g0644600	Q7XTM8	OSJNBa0033G05.17 protein OS=Oryza sativa subsp. japonica OX=39947 GN=Os04g0644600 PE=2 SV=2 - [Q7XTM8_ORYSJ]	349.162	38.78	3	9	9	27	0.000173579	0.000210119	0.00296365	0.0168481	0.826096	-0.275619
OsI_14277	B8AN77	Uncharacterized protein OS=Oryza sativa subsp. indica OX=39946 GN=OsI_14277 PE=4 SV=1 - [B8AN77_ORYSI]	74.6209	40.36	4	6	9	11	0.000173016	0.000209328	0.00657223	0.0237816	0.826529	-0.274863
OsI_21018	A2Y7K1	Uncharacterized protein OS=Oryza sativa subsp. indica OX=39946 GN=OsI_21018 PE=3 SV=1 - [A2Y7K1_ORYSI]	32.97	5.2	2	2	2	2	0.00015645	0.000189208	0.0211948	0.0387116	0.826867	-0.274273
LOC_Os12g34070	Q2QPL4	Mitochondrial ribosomal protein S3, putative, expressed OS=Oryza sativa subsp. japonica OX=39947 GN=LOC_Os12g34070 PE=3 SV=1 - [Q2QPL4_ORYSJ]	46.618	5.88	4	2	3	6	0.000164818	0.000199213	0.00823156	0.0262134	0.827342	-0.273445
OsJ_10246	B9F773	Uncharacterized protein OS=Oryza sativa subsp. japonica OX=39947 GN=OsJ_10246 PE=3 SV=1 - [B9F773_ORYSJ]	252.034	24.46	4	8	8	33	0.000169863	0.000205037	1.38053e-05	0.00414439	0.828447	-0.271519
OsI_36451	B8BL02	Uncharacterized protein OS=Oryza sativa subsp. indica OX=39946 GN=OsI_36451 PE=4 SV=1 - [B8BL02_ORYSI]	102.913	32.84	4	5	5	9	0.000186974	0.000225647	0.0125278	0.0312799	0.828613	-0.27123
P0694A04.40-2	Q5SMZ3	Uncharacterized protein OS=Oryza sativa subsp. japonica OX=39947 GN=P0694A04.40-2 PE=4 SV=1 - [Q5SMZ3_ORYSJ]	24.58	10	2	1	1	1	0.000176851	0.000213385	0.0257081	0.042317	0.828789	-0.270923
LOC_Os10g18340	Q7G649	Expressed protein OS=Oryza sativa subsp. japonica OX=39947 GN=LOC_Os10g18340 PE=2 SV=1 - [Q7G649_ORYSJ]	217.698	60.61	3	8	8	28	0.000239875	0.000289377	0.0157207	0.0340192	0.828937	-0.270665
BASS4	B8AJ09	Probable sodium/metabolite cotransporter BASS4, chloroplastic OS=Oryza sativa subsp. indica OX=39946 GN=BASS4 PE=3 SV=1 - [BASS4_ORYSI]	32.58	2.36	1	1	1	1	0.000145452	0.000175415	0.0498863	0.0603007	0.829188	-0.270228
Os05g0591900	A0A0P0WR49	Os05g0591900 protein (Fragment) OS=Oryza sativa subsp. japonica OX=39947 GN=Os05g0591900 PE=4 SV=1 - [A0A0P0WR49_ORYSJ]	220.882	39.7	5	7	10	18	0.000176561	0.000212889	0.00679749	0.024128	0.829357	-0.269935
Os12g0207600	Q0IPF7	Os12g0207600 protein OS=Oryza sativa subsp. japonica OX=39947 GN=Os12g0207600 PE=3 SV=1 - [Q0IPF7_ORYSJ]	10450.6	41.54	6	5	26	1161	0.000157988	0.00019047	0.0305843	0.0461071	0.829463	-0.26975
VDAC3	Q7F4F8	Mitochondrial outer membrane protein porin 3 OS=Oryza sativa subsp. japonica OX=39947 GN=VDAC3 PE=2 SV=1 - [VDAC3_ORYSJ]	199.519	24	1	4	4	7	0.000176375	0.000212596	0.0168848	0.034918	0.829625	-0.269469
OsI_31789	A2Z2F3	Uncharacterized protein OS=Oryza sativa subsp. indica OX=39946 GN=OsI_31789 PE=4 SV=1 - [A2Z2F3_ORYSI]	185.761	22.7	3	5	5	44	0.000210678	0.000253785	0.0191422	0.0368476	0.830144	-0.268566
GAPC	A2YQT7	Glyceraldehyde-3-phosphate dehydrogenase, cytosolic OS=Oryza sativa subsp. indica OX=39946 GN=GAPC PE=2 SV=1 - [G3PC_ORYSI]	1117.83	60.24	5	10	20	119	0.000180921	0.000217914	0.000676574	0.00938855	0.830239	-0.268401
Os12g0226700	Q2QVJ8	NADP-dependent oxidoreductase P2, putative, expressed OS=Oryza sativa subsp. japonica OX=39947 GN=Os12g0226700 PE=4 SV=1 - [Q2QVJ8_ORYSJ]	66.2745	19.08	10	4	6	7	0.000152565	0.000183661	0.00282869	0.0165101	0.830685	-0.267627
OsI_30281	A2YY54	Uncharacterized protein OS=Oryza sativa subsp. indica OX=39946 GN=OsI_30281 PE=4 SV=1 - [A2YY54_ORYSI]	1438.04	67	2	13	13	220	0.000202214	0.000243408	0.00305329	0.017063	0.83076	-0.267496
Os02g0452500	Q0E1G2	Os02g0452500 protein (Fragment) OS=Oryza sativa subsp. japonica OX=39947 GN=Os02g0452500 PE=3 SV=1 - [Q0E1G2_ORYSJ]	37.11	8.51	6	2	2	2	0.000182329	0.000219437	0.0297452	0.0454628	0.830895	-0.267261
Os06g0716700	Q0D9G9	Os06g0716700 protein OS=Oryza sativa subsp. japonica OX=39947 GN=Os06g0716700 PE=3 SV=1 - [Q0D9G9_ORYSJ]	553.574	37.9	7	29	29	56	0.000213983	0.00025733	9.73933e-05	0.00573109	0.831553	-0.26612
OsI_35242	B8BJ82	Uncharacterized protein OS=Oryza sativa subsp. indica OX=39946 GN=OsI_35242 PE=3 SV=1 - [B8BJ82_ORYSI]	898.066	62.07	2	4	18	84	0.000179385	0.000215708	0.00738622	0.0250285	0.831613	-0.266016
CatA	A3REN3	Catalase OS=Oryza sativa subsp. indica OX=39946 GN=CatA PE=2 SV=2 - [A3REN3_ORYSI]	514.497	57.32	7	19	24	95	0.00023311	0.000280199	0.00191411	0.0141434	0.831946	-0.265438
OsI_20609	A2Y6H0	Proline iminopeptidase OS=Oryza sativa subsp. indica OX=39946 GN=OsI_20609 PE=3 SV=1 - [A2Y6H0_ORYSI]	0	5.1	2	1	1	1	0.000213309	0.000256371	0.0101534	0.0286873	0.832034	-0.265286
OSIGBa0135C09.6	A0B9Y0	OSIGBa0135C09.6 protein OS=Oryza sativa OX=4530 GN=OSIGBa0135C09.6 PE=4 SV=1 - [A0B9Y0_ORYSA]	26.98	12.68	5	3	3	3	0.00016068	0.000193115	0.015682	0.0339904	0.832043	-0.265271
Os06g0119600	Q5VPQ6	Os06g0119600 protein OS=Oryza sativa subsp. japonica OX=39947 GN=Os06g0119600 PE=2 SV=1 - [Q5VPQ6_ORYSJ]	47.8973	13.54	3	4	5	9	0.000192896	0.000231756	0.0223277	0.0396889	0.832324	-0.264782
ht	Q85V22	Histidine amino acid transporter OS=Oryza sativa subsp. indica OX=39946 GN=ht PE=4 SV=1 - [Q85V22_ORYSI]	0	9.07	2	4	4	5	0.000206201	0.000247669	0.013207	0.031931	0.832568	-0.26436
