# Supplementary material for: Integrated proteomics and metabolomics analysis of rice leaves in response to rice straw return
Source: Front Plant Sci. 2022 Sep 13;13:997557. doi: 10.3389/fpls.2022.997557 (PMC9514043; doi:10.3389/fpls.2022.997557)
Supplement: Supplementary file 4 [file Table_3.XLSX]

## Sheet: sheet 1
Supplementary Table 3 The differentially expressed metabolites between rice straw return and no straw return
Ion mode	Name	rt (s)	m/z	VIP	Fold change (SR/S0)	p-value
ESI(+)	5-Pentyloxazole	237.582	140.107	2.5353	8.22811	0.00134759
ESI(+)	5,2'-Dihydroxy-7-methoxy-6,8-dimethyl-4',5'-methylenedioxyflavan	206.552	345.133	1.72929	3.72664	0.0159668
ESI(+)	Ala Met Cys	148.608	324.107	1.90988	3.68033	0.0417556
ESI(+)	Irgarol-descyclopropyl	269.45	214.112	1.73528	3.04016	0.00362683
ESI(+)	Prometryn	338.058	242.143	1.73929	3.02456	0.0137932
ESI(+)	Enicoflavine	135.96	212.091	2.18403	2.98386	0.000151658
ESI(+)	Rutaecarpine	221.133	288.112	1.77506	2.9464	0.00372191
ESI(+)	Cys Asn His	215.647	373.128	1.67461	2.62053	0.0374419
ESI(+)	sn-Glycero-3-phosphocholine	32.3484	258.109	2.19742	2.5983	0.0016721
ESI(+)	Simazine-2-hydroxy	179.737	184.119	1.70893	2.53712	0.0124562
ESI(+)	Epigallocatechin	43.6929	307.082	2.14324	2.32079	0.016794
ESI(+)	Panthenol	156.627	206.138	1.86782	2.30391	0.0499236
ESI(+)	3-Methyl-19-nor-17alpha-pregna-1,3,5(10)-trien-17-ol	312.32	299.236	1.94799	2.19633	0.011092
ESI(+)	Kievitone hydrate	197.191	375.144	1.73503	2.00692	0.0187111
ESI(+)	6-(2-Chloroallylthio)purine	56.5849	227.016	2.14374	1.85459	0.000274751
ESI(+)	5-Ethyl-2,4-dimethyloxazole	211.9	126.091	1.70817	1.76848	0.0185493
ESI(+)	6'-Methoxypolygoacetophenoside	167.9	361.109	1.61264	1.76213	0.0392664
ESI(+)	ent-Corey PG-Lactone Diol	210.272	269.174	1.76132	1.75794	0.0130144
ESI(+)	Proline	34.892	116.07	1.94345	1.68676	0.0305618
ESI(+)	D-Aspartic acid	31.4025	134.045	1.91937	1.6851	0.0129439
ESI(+)	Raclopride	147.767	347.094	1.76118	1.65694	0.0140029
ESI(+)	3,4-Dicaffeoyl-1,5-quinolactone	293.025	499.119	1.83498	1.57862	0.0104293
ESI(+)	8-Acetylegelolide	248.807	309.13	1.64806	1.57643	0.0128528
ESI(+)	Citric acid	43.2506	193.034	1.57905	1.5569	0.0165545
ESI(+)	Lys His Trp His	311.802	607.307	1.70199	1.53821	0.0163197
ESI(+)	Glu Phe Gln Asn	248.005	537.229	1.44465	1.53222	0.0413387
ESI(+)	Phe Glu Trp	253.09	481.203	1.56008	1.51329	0.0399204
ESI(+)	N-Acetyl-L-arginine	39.3216	217.129	1.63181	1.50075	0.0277863
ESI(+)	3-oxoglutaric acid	43.44	147.029	1.50672	1.469	0.0339154
ESI(+)	O-PHOSPHO-DL-SERINE	31.4038	186.016	1.73398	1.38778	0.0309665
ESI(+)	Lys Cys Asp Asn	258.735	479.187	1.71527	1.37282	0.00931735
ESI(+)	N-Acetyl-D-fucosamine	138.594	206.102	1.83967	1.3306	0.00667755
ESI(+)	Epicatechin 3-O-(3-O-methylgallate)	184.073	457.11	1.87318	1.30753	0.0102212
ESI(+)	Methionine	43.4384	150.058	1.45305	1.25682	0.0336657
ESI(+)	Taxifolin 3-O-acetate	245.6	347.075	1.79661	1.25157	0.0180528
ESI(+)	Traumatic Acid	223.376	229.143	1.48315	1.15145	0.0447863
ESI(+)	Diglyme	170.307	135.101	1.61339	1.14821	0.0290176
ESI(+)	Met Met	296.248	281.099	1.68008	0.910976	0.0272394
ESI(+)	3,5-Dicaffeoyl-4-succinoylquinic acid	209.262	617.146	1.45851	0.832817	0.0350027
ESI(+)	beta-Nicotinamide mononucleotide	35.4184	335.063	1.94719	0.832462	0.00563836
ESI(+)	BETA-D-LACTOSE	35.7276	343.122	1.79714	0.812253	0.0129492
ESI(+)	Adenosine	107.082	268.103	1.50975	0.80783	0.046403
ESI(+)	Malvidin 3-O-(6-O-(4-O-caffeoyl-alpha-rhamnopyranosyl)-beta-glucopyranoside)	225.53	801.221	1.79655	0.78727	0.0187154
ESI(+)	D-Tagatose	35.6574	163.06	1.91374	0.771202	0.00593236
ESI(+)	Furfural	35.4163	97.0282	1.83611	0.770535	0.0110076
ESI(+)	3R-Hydroxyhexan-2-one	183.512	117.091	1.86769	0.767137	0.0141916
ESI(+)	Kojibiose	35.5535	325.112	1.87529	0.762281	0.00755738
ESI(+)	Val His Ser	183.506	342.175	1.80264	0.760268	0.0194366
ESI(+)	3-Oxoadipic acid	55.6423	161.044	2.15825	0.755108	0.000770211
ESI(+)	2,5-Furandicarboxylic acid	36.0191	157.013	1.70238	0.742926	0.0223798
ESI(+)	1-L-Leucyl-L-Proline	174.893	229.154	1.49778	0.740932	0.03595
ESI(+)	L-gamma-Glutamyl-S-allylthio-L-cysteine	164.428	323.073	1.43092	0.731888	0.0473917
ESI(+)	Maltotriose	35.6436	527.156	1.64972	0.731539	0.0308472
ESI(+)	Val Ala Val	174.888	288.191	1.62713	0.728772	0.045958
ESI(+)	Quinone	35.4269	109.028	1.91144	0.727094	0.00812222
ESI(+)	Choline	31.9392	104.107	2.24922	0.716479	0.000609733
ESI(+)	5-Methyl-2(3H)-furanone	35.3939	99.0439	1.95034	0.707136	0.00552013
ESI(+)	Catechin 5-O-(2-feruloyl-6-p-coumaroyl-beta-D-glucopyranoside)	226.075	775.221	1.80572	0.705585	0.0169943
ESI(+)	1-Monopalmitin	401.276	331.283	1.64963	0.699964	0.0300522
ESI(+)	Ile Ala Gly	160.326	260.16	1.87556	0.698056	0.00651505
ESI(+)	2(5H)-Furanone	49.5893	85.0282	2.03462	0.691389	0.00318314
ESI(+)	14(15)-EpETE	366.778	319.226	1.92108	0.681637	0.0116626
ESI(+)	13-HODE	482.303	279.231	1.47388	0.678186	0.0444219
ESI(+)	Retinoic acid	366.767	301.215	1.89038	0.67749	0.0142663
ESI(+)	Glucosylisomaltol	49.054	289.091	2.02845	0.672483	0.00219119
ESI(+)	beta-D-Glucosamine	35.4173	180.086	1.98006	0.668688	0.00440612
ESI(+)	Osmanthuside B	216.177	593.218	1.75586	0.666178	0.011906
ESI(+)	PE(18:1(9Z)/0:0)	423.02	480.307	1.60353	0.660393	0.0233193
ESI(+)	Genistein	224.856	271.059	2.08527	0.655175	0.0151022
ESI(+)	D-(+)-GLUCOSAMINE	49.2536	180.086	2.21051	0.652041	0.000395132
ESI(+)	Galactose	49.293	198.097	2.13075	0.646704	0.000909592
ESI(+)	3-Hydroxybenzaldehyde	88.9144	123.044	2.16654	0.638907	0.000738599
ESI(+)	Asn Trp Leu Ala	283.382	503.26	1.79218	0.63767	0.0260811
ESI(+)	Tiaprofenic acid	76.4629	261.057	2.07912	0.636071	0.00141462
ESI(+)	Glu Val	144.261	247.128	1.84628	0.589366	0.0165304
ESI(+)	Terminaline	538.461	364.32	1.93288	0.586508	0.00344625
ESI(+)	Benzaldehyde	148.709	107.049	1.66518	0.577818	0.0287145
ESI(+)	Lovastatin acid	406.377	423.273	1.46697	0.569529	0.0216481
ESI(+)	5,8,3',4',5'-Pentahydroxy-3,7-dimethoxyflavone	35.1489	363.068	1.84528	0.565495	0.00483415
ESI(+)	Citronellyl alpha-toluate	344.497	275.2	1.71159	0.564246	0.00979762
ESI(+)	Gly Glu His	35.4171	342.138	2.05037	0.562249	0.00127045
ESI(+)	3-Deoxyestradiol	344.494	257.189	1.5533	0.539062	0.011024
ESI(+)	Marginatoside	180.838	757.216	1.68511	0.528397	0.0181685
ESI(+)	1,7-Dimethylxanthine	31.3941	219.026	2.04652	0.52306	0.00379873
ESI(+)	2-Methylcitrate	57.4931	207.049	1.89556	0.508167	0.00109013
ESI(+)	Trp Thr Phe	252.823	453.208	1.78023	0.492865	0.0429948
ESI(+)	MG(18:2(9Z,12Z)/0:0/0:0)[rac]	423.419	355.283	1.82772	0.469153	0.0070474
ESI(+)	His Arg Gln Phe	252.289	587.302	1.97647	0.467799	0.0250278
ESI(+)	Gly Tyr Pro Phe	275.663	483.219	1.80982	0.462802	0.0426349
ESI(+)	Syringic acid	171.315	199.06	2.13716	0.434955	0.000361419
ESI(+)	Diphenylsulfoxide	31.6712	203.052	1.68535	0.421471	0.033871
ESI(+)	Leu Pro Pro His	415.874	463.265	1.84428	0.39017	0.00256355
ESI(+)	Leukotriene F4	303.452	569.291	1.99031	0.38767	0.0249627
ESI(+)	3-Buten-1-amine	26.5896	72.0807	2.1967	0.275434	0.0170194
ESI(+)	12-bromo-dodecanoic acid	332.426	279.093	2.50176	0.192655	0.00198454
ESI(-)	Phosphoric acid	39.8662	96.9695	2.11501	2.56093	0.00272245
ESI(-)	Glutathione	28.2969	611.144	2.04548	2.46531	0.0243133
ESI(-)	UDP-glucose	27.9856	565.047	2.06843	1.86076	0.00547895
ESI(-)	Asp	27.8852	132.03	1.7282	1.61182	0.0437395
ESI(-)	Trehalose 6-phosphate	28.2154	421.075	1.60738	1.56833	0.0410107
ESI(-)	Malic acid	43.1675	133.014	1.75909	1.43803	0.0112845
ESI(-)	Syringetin-3-O-glucoside	229.504	507.114	1.58667	1.1993	0.0299316
ESI(-)	Itaconate	57.7566	129.019	2.02622	0.885126	0.00705597
ESI(-)	3-methyl pyruvic acid	32.0441	101.024	1.8042	0.692505	0.00365444
ESI(-)	myo-Inositol	30.8269	179.056	2.01473	0.652251	0.00634825
ESI(-)	Lactulose	49.3695	341.108	2.03302	0.651258	0.00143771
ESI(-)	D-Arabinono-1,4-lactone	29.6474	147.03	1.42576	0.640103	0.0148166
ESI(-)	Isolauric acid	368.635	199.17	2.06831	0.629492	0.0137903
ESI(-)	FERULATE	144.815	193.05	1.87238	0.609962	0.00382358
ESI(-)	2-trans-Hexadecenoic Acid	433.072	253.217	2.04811	0.58514	0.00117857
ESI(-)	Trehalose	35.5801	377.085	2.16141	0.515535	0.00113102
ESI(-)	Linolenic Acid	434.913	277.217	1.72676	0.501215	0.00924535
ESI(-)	12-OPDA	341.296	291.196	1.52659	0.493362	0.0272917
ESI(-)	Linoelaidic acid	471.664	279.233	2.38855	0.468201	1.58356e-05
ESI(-)	Stearic acid	551.838	283.264	2.05657	0.351716	0.0104148
